# Supplementary material for: Cleavage of oxygen–sulfur double bonds and carbon–sulfur bonds: unusual highly selective electrophilic addition of allenylic sulfoxides
Source: Royal Society of Chemistry journal article supplement (doi:10.1039/c2sc21920d), 2012-11-09

# **Cleavage of Oxygen-Sulfur Double Bond and Carbon-Sulfur Bond: Unnatural Highly Selective Electrophilic Addition of Allenylic Sulfoxides**

Minyan Wang, Chunling Fu, and Shengming Ma \*

*Laboratory of Molecular Recognition and Synthesis, Department of Chemistry,  
Zhejiang University, 310027 Hangzhou, Zhejiang, P. R. China*

Fax: (+86) 21-62609305;

E-mail: [masm@mail.sioc.ac.cn](mailto:masm@mail.sioc.ac.cn)

## **Supporting Information**

## Table of Contents

|                                                                                               |          |
|-----------------------------------------------------------------------------------------------|----------|
| General Information                                                                           | S3       |
| The Known Methods for the Synthesis of Enones or Enals                                        | S3-S4    |
| The Known Methods for the Synthesis of $\alpha$ -Iodoallylic Alcohols                         | S4-S6    |
| Supplementary Table S1-S4                                                                     | S7-S9    |
| Preparation of Starting 1,2-Allenlyic Sulfoxides <b>1c</b> , <b>1d</b> , and <b>1l</b>        | S9-S12   |
| Preparation of Starting 1,2-Allenlyic Sulfoxides <b>1e</b> , <b>1f</b> , and <b>1g</b>        | S12-S15  |
| The Reaction of 1,2-Allenlyic Sulfoxide <b>1a</b> Affording <i>E</i> - <b>2a</b>              | S15-S16  |
| Preparation of <i>Z</i> -1-Iodo-1-alkenyl Ketones <i>Z</i> - <b>3a</b> - <i>Z</i> - <b>3f</b> | S16-S21  |
| Preparation of 2-Iodo-2-enals with the Same Substituents at the 3-Position<br><b>3h-3k</b>    | S22-S24  |
| Preparation of <i>Z</i> -2-Iodo-2-enals <i>Z</i> - <b>3l</b> - <i>Z</i> - <b>3o</b>           | S24-S27  |
| Preparation of <i>E</i> -2-Iodo-3-phenyl-2-enals <i>E</i> - <b>3p</b> - <i>E</i> - <b>3q</b>  | S27-S29  |
| The Reaction of <b>3</b> with 2,4- Dinitrophenylhydrazine Affording <b>4</b>                  | S29-S31  |
| The Synthetic Application of the <i>Z</i> - <b>3a</b> Affording <b>5-6</b>                    | S31-S33  |
| Experiments for Mechanistic Study                                                             | S33-S43  |
| References                                                                                    | S43-S46  |
| $^1\text{H}/^{13}\text{C}$ NMR Spectra of These Compounds                                     | S47-S131 |

### General Information:

Anhydrous  $\text{CHCl}_3$  was dried over  $\text{P}_2\text{O}_5$  under reflux for 5 hours and distilled before use. Commercial anhydrous EtOH was used.  $\text{Et}_3\text{N}$  was dried over KOH and distilled freshly before use.  $\text{CH}_2\text{Cl}_2$  was dried over  $\text{CaH}_2$  under reflux for 3 hours and distilled before use. THF was dried over sodium wire with benzophenone as indicator and distilled freshly before use. The petroleum ether (30-60 °C) for chromatography was distilled before use. Other reagents were used without further treatment.

### The known methods for the synthesis of enones or enals:

Transition metal-catalyzed hydroacylation of alkynes with aldehydes or alcohols usually affords *E/Z* mixtures of  $\alpha,\beta$ -enones together with an issue of regioselectivity referring to the alkynes.<sup>1-4</sup> When Lewis acids were used in such transformations, *E/Z* >99/1 can be achieved only when the group of  $\text{R}^1$  is larger than the  $\text{R}^2$ .<sup>5</sup> In addition, these methodologies are limited to incorporate substituents into the  $\beta$  position of the enones or enals. The Wittig reaction between ylides and aldehydes afforded *Z/E* mixtures.<sup>6-7</sup> When  $\text{R}^2 = \text{quinolyl}$  and  $\text{R}^3 = \text{H}$ , the reaction could afford the enals with the ratio of *E/Z* up to 99/1.<sup>6</sup> Isomerization of propargylic alcohols catalyzed by Ag, Au, and Ru complexes could also afford enones.<sup>8-10</sup> However, poor *E/Z* ratio were observed and these methodologies cannot incorporate substituents into the  $\alpha$  positions. The aldol addition between ketones and aldehydes is an efficient approach to  $\alpha,\beta$ -unsaturated ketones, however, this methodology cannot be used

widely because of the regioselectivity arise from the unsymmetric ketones.<sup>11</sup>

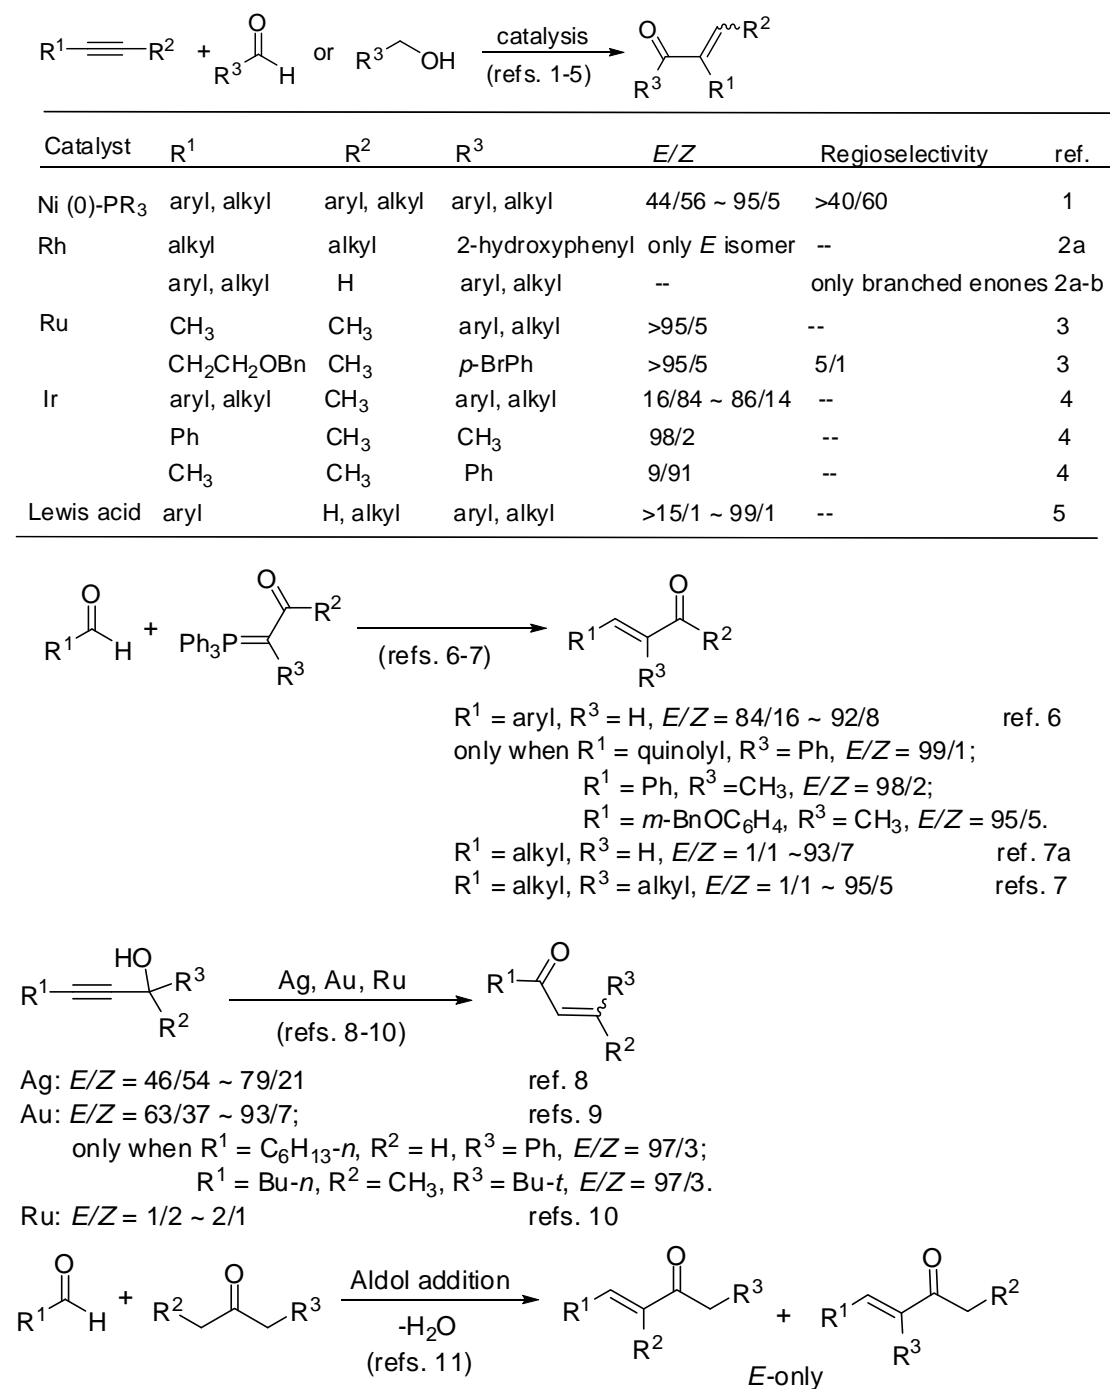

**Figure 1. The known methods for the synthesis of enones or enals**

The known methods for the synthesis of  $\alpha$ -iodoallylic alcohols:

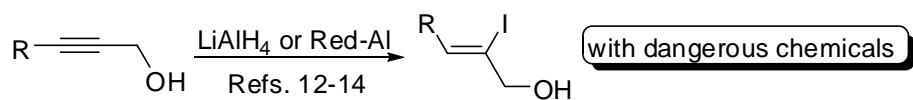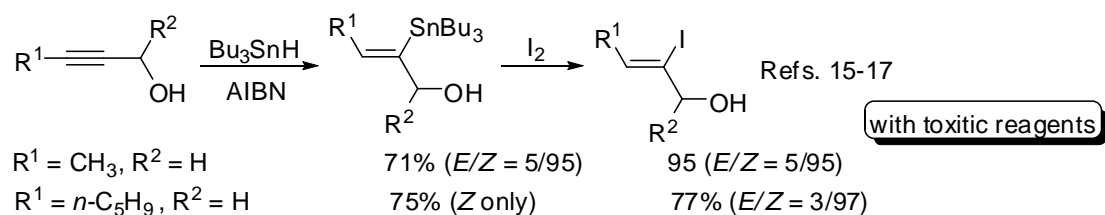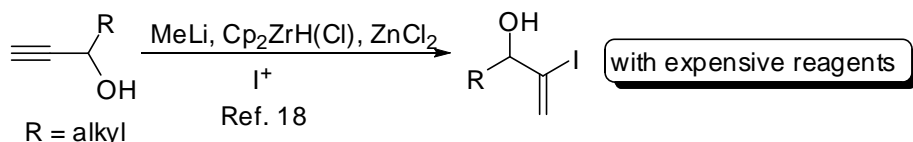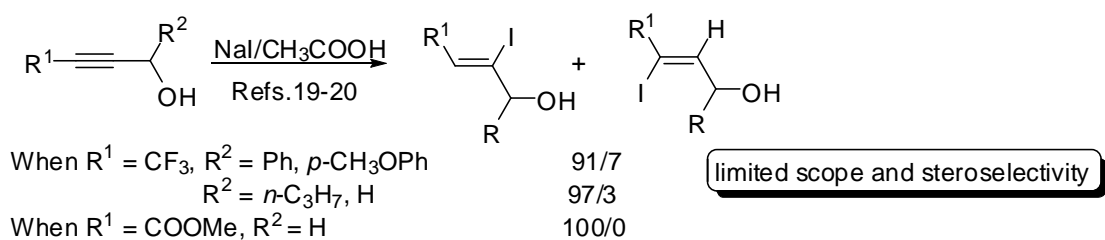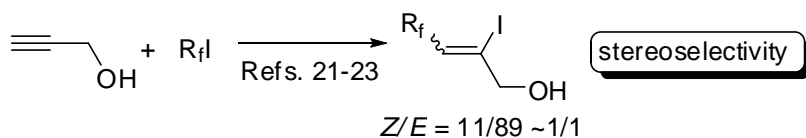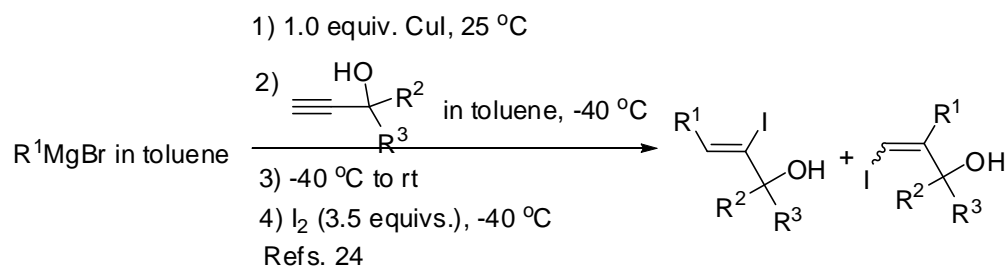

R<sup>1</sup> = alkyl, aryl; R<sup>2</sup> = alkyl, aryl; R<sup>3</sup> = H, CH<sub>3</sub>      90/10 ~ >99/1

stoichiometric amounts of reagent, stereoselectivity, and non-convenient temperature

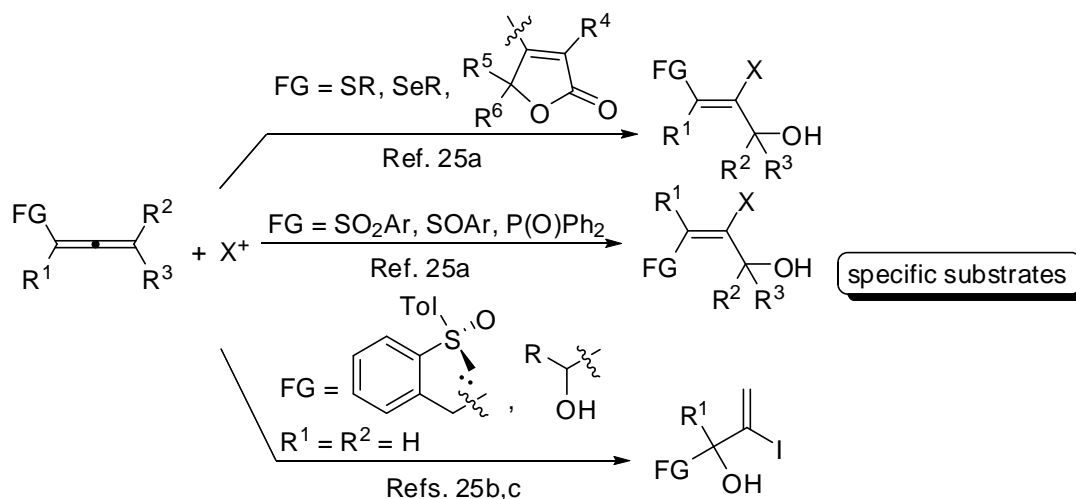

**Supplementary Table S1-S4:**

**Table S1. Effect of H<sub>2</sub>O or EtOH <sup>a</sup>**

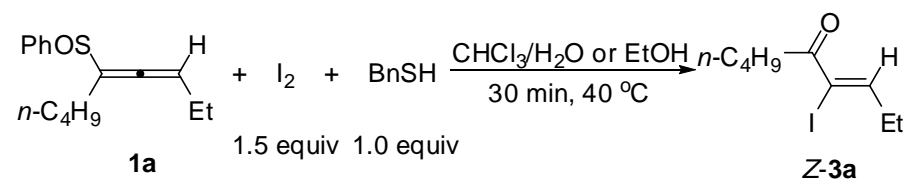

| entry           | H <sub>2</sub> O or EtOH             | yield of Z-3a (%) <sup>b</sup> |
|-----------------|--------------------------------------|--------------------------------|
| 1               | 0                                    | 0                              |
| 2               | 27 μL H <sub>2</sub> O (5.0 equiv)   | 0                              |
| 3               | 54 μL H <sub>2</sub> O (10.0 equiv)  | 2                              |
| 4               | 270 μL H <sub>2</sub> O (50.0 equiv) | 1                              |
| 5               | 86 μL EtOH (5.0 equiv)               | 46                             |
| 6               | 75 μL EtOH (4.4 equiv)               | 50                             |
| 7               | 100 μL EtOH (5.9 equiv)              | 51                             |
| <b>8</b>        | <b>120 μL EtOH (7.1 equiv)</b>       | <b>53</b>                      |
| 9               | 150 μL EtOH (8.9 equiv)              | 48                             |
| 10              | 300 μL EtOH (17.7 equiv)             | 44                             |
| 11 <sup>c</sup> | 600 μL EtOH (35.5 equiv)             | 8                              |

<sup>a</sup> A solution of **1a** (0.3 mmol), CHCl<sub>3</sub> (4 mL, dried under reflux over P<sub>2</sub>O<sub>5</sub> for 5 hours and

distilled), and anhydrous EtOH or H<sub>2</sub>O was treated with I<sub>2</sub> (0.45 mmol) for 5 min at 40 °C followed by the addition of a solution of BnSH in CHCl<sub>3</sub> (0.15 M, 2 mL, dried under reflux over P<sub>2</sub>O<sub>5</sub> for 5 hours and distilled) with stirring. After being stirred for 30 min, the mixture was quenched with 6 mL of water followed by the addition of a saturated aqueous solution of Na<sub>2</sub>S<sub>2</sub>O<sub>3</sub> at 40 °C. <sup>b</sup> The yields were determined by <sup>1</sup>H NMR analysis with CH<sub>2</sub>Br<sub>2</sub> as the internal standard. <sup>c</sup> 64% of *E*-**2a** was formed.

**Table S2. Effect of temperature on the yield of Z-3a<sup>a</sup>**

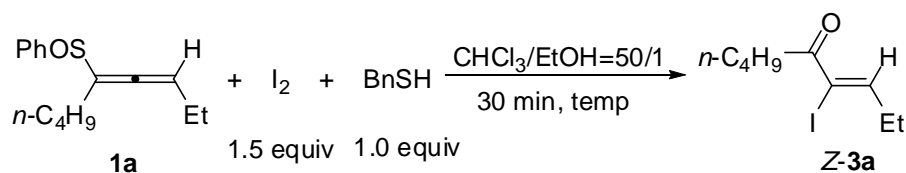

| entry          | temp (°C) | yield of <b>Z-3a</b> (%) <sup>b</sup> |
|----------------|-----------|---------------------------------------|
| 1 <sup>c</sup> | 10        | 7                                     |
| 2 <sup>d</sup> | 20        | 47                                    |
| 3              | 30        | 48                                    |
| <b>5</b>       | <b>40</b> | <b>53</b>                             |
| 6              | 50        | 47                                    |
| 7              | 60        | 45                                    |

<sup>a</sup> A solution of **1a** (0.3 mmol), CHCl<sub>3</sub> (4 mL, dried under reflux over P<sub>2</sub>O<sub>5</sub> for 5 hours and distilled), and EtOH (30 μL) was treated with I<sub>2</sub> (0.45 mmol) for 5 min followed by the addition of a solution of BnSH in CHCl<sub>3</sub> (0.15 M, 2 mL, dried under reflux over P<sub>2</sub>O<sub>5</sub> for 5 hours and distilled) with stirring. After being stirred for 30 min, the mixture was quenched with 6 mL of water followed by the addition of a saturated aqueous solution of Na<sub>2</sub>S<sub>2</sub>O<sub>3</sub>. <sup>b</sup> The yields were determined by <sup>1</sup>H NMR analysis with CH<sub>2</sub>Br<sub>2</sub> as the internal standard. <sup>c</sup> 58% of *E*-**2a** was formed under this condition. <sup>d</sup> The reaction was complete in 45 min.

**Table S3. Effect of the loading of I<sub>2</sub> on the reaction of nona-3,4-dien-5-ylphenyl sulfoxide **1a** with I<sub>2</sub> in the BnSH<sup>a</sup>**

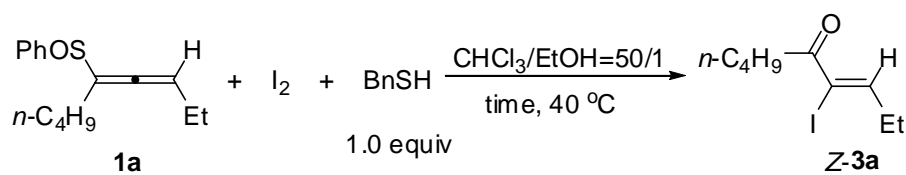

| entry    | I <sub>2</sub> (equiv) | time (min) | yield of <b>Z-3a</b> (%) <sup>b</sup> |
|----------|------------------------|------------|---------------------------------------|
| 1        | 1.0                    | 30         | 28                                    |
| 2        | 2.0                    | 30         | 62                                    |
| 3        | 2.5                    | 15         | 70                                    |
| 4        | 3.0                    | 15         | 76                                    |
| <b>5</b> | <b>3.5</b>             | <b>15</b>  | <b>81</b>                             |
| 6        | 4.0                    | 15         | 80                                    |
| 7        | 5.0                    | 15         | 80                                    |

<sup>a</sup> A solution of **1a** (0.3 mmol), CHCl<sub>3</sub> (4 mL, dried under reflux over P<sub>2</sub>O<sub>5</sub> for 5 hours and distilled), and anhydrous EtOH (30 μL) was treated with I<sub>2</sub> for 5 min at 40 °C followed by the addition of a solution of BnSH in CHCl<sub>3</sub> (0.15 M, 2 mL, dried under reflux over P<sub>2</sub>O<sub>5</sub> for 5 hours and distilled) with stirring. After the reaction completed, the mixture was quenched with 6 mL of water followed by the addition of a saturated aqueous solution of Na<sub>2</sub>S<sub>2</sub>O<sub>3</sub> at 40 °C. <sup>b</sup> The yields were determined by <sup>1</sup>H NMR analysis with CH<sub>2</sub>Br<sub>2</sub> as the internal standard.



**Table S4. Concentration effect on the reaction of nona-3,4-dien-5-ylphenyl sulfoxide **1a** with I<sub>2</sub> in the presence of BnSH<sup>a</sup>**

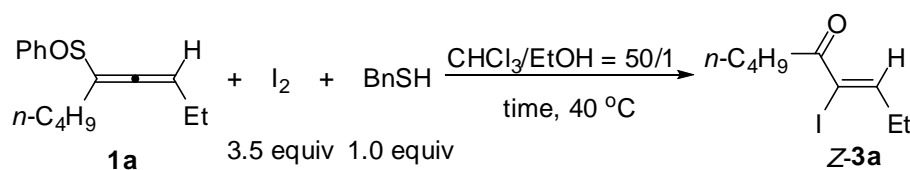

| entry          | c (mmol/mL) | time (min) | yield of <b>Z-3a</b> (%) <sup>b</sup> |
|----------------|-------------|------------|---------------------------------------|
| 1              | 0.05        | 15         | 83                                    |
| 2 <sup>c</sup> | 0.05        | 180        | 0                                     |
| 3              | 0.1         | 15         | 85                                    |
| <b>4</b>       | <b>0.2</b>  | <b>15</b>  | <b>89 (82<sup>d</sup>)</b>            |
| 5 <sup>e</sup> | 0.3         | 15         | 76                                    |

<sup>a</sup> A solution of **1a** (0.3 mmol), CHCl<sub>3</sub> (dried under reflux over P<sub>2</sub>O<sub>5</sub> for 5 hours and distilled), and anhydrous EtOH was treated with I<sub>2</sub> (1.05 mmol) for 5 min at 40 °C followed by the addition of a solution of BnSH (0.3 mmol) in CHCl<sub>3</sub> (dried under reflux over P<sub>2</sub>O<sub>5</sub> for 5 hours and distilled) with stirring. After the reaction completed, the mixture was quenched with 6 mL of water followed by the addition of a saturated aqueous solution of Na<sub>2</sub>S<sub>2</sub>O<sub>3</sub> at 40 °C. <sup>b</sup> The yields were determined by <sup>1</sup>H NMR analysis with CH<sub>2</sub>Br<sub>2</sub> as the internal standard. <sup>c</sup> The reaction was conducted in the absence of BnSH. <sup>d</sup> Isolated yield. <sup>e</sup> 0.6 mmol **1a** and 2 mL of CHCl<sub>3</sub> were used.

### Preparation of Starting 1,2-Allenlic Sulfoxides **1c**, **1d**, and **1l**

Synthesis of the starting materials: Compounds **1a-b**, **1h-o**, and **1q-r** were prepared according to the known procedures<sup>28-30</sup>. Compounds **1c**, **1d**, **1e**, **1f**, **1g**, and **1p** were prepared as follows:

## 1. 2-Methylnona-3,4-dien-5-yl phenyl sulfoxide (**1c**) wmy-3-132

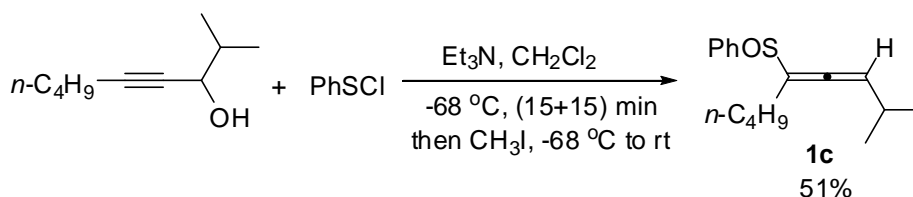

**Typical Procedure**<sup>28</sup>: To a dried three-neck round bottom flask were added 2-methylnon-4-yn-3-ol (1.5417 g, 10 mmol), CH<sub>2</sub>Cl<sub>2</sub> (20 mL), and triethylamine (1.55 mL, d = 0.72 g/mL, 1.116 g, 10 mmol) sequentially. After the mixture was cooled to -68 °C, a solution of sulfenyl chloride (1.4531 g, 10 mmol) was added dropwise within 15 min. After being stirred at -68 °C for another 15 min, methyl iodide (0.3 mL, d = 2.28 g/mL, 0.684 g, 4.8 mmol) was added, then the resulting mixture was allowed to warm up naturally to room temperature followed by quenching with water (10 mL). The organic layer was separated, and the aqueous layer was extracted with CH<sub>2</sub>Cl<sub>2</sub> (10 mL). The combined organic layer was dried over anhydrous Na<sub>2</sub>SO<sub>4</sub>. Filtration, evaporation and chromatography on silica gel (eluent: petroleum ether / ethyl acetate = 15/1 ~ 8/1) of the crude product afforded **1c** (1.3464 g, 51%) as an oil. <sup>1</sup>H NMR (300 MHz, CDCl<sub>3</sub>) δ 7.68-7.56 (m, 2 H, ArH), 7.55-7.40 (m, 3 H, ArH), 5.78-5.64 (m, 1 H, =CH), 2.53-2.34 (m, 1 H), 2.33-2.14 (m, 1 H), 1.94-1.76 (m, 1 H), 1.46-1.16 (m, 4 H, 2 × CH<sub>2</sub>), 1.14-0.96 (m, 6 H, 2 × CH<sub>3</sub>), 0.87-0.73 (m, 3 H, CH<sub>3</sub>); <sup>13</sup>C NMR (75 MHz, CDCl<sub>3</sub>) δ 200.2, 200.1, 143.8, 143.4, 130.5, 130.4, 128.73, 128.70, 124.5, 124.3, 114.7, 114.4, 106.4, 106.2, 29.5, 28.4, 28.3, 22.7, 22.6, 22.3, 22.22, 22.19, 21.9, 13.6; IR (neat) ν (cm<sup>-1</sup>) 3058, 2960, 2930, 2871, 1951, 1578, 1465, 1443, 1379, 1364, 1293, 1083, 1049, 1022; MS (70 eV, EI)

$m/z$  (%) 262 ( $M^+$ , 1.30), 81 (100); Anal. Calcd. for  $C_{16}H_{22}OS$ : C, 73.23, H, 8.45;  
Found: C, 72.93, H, 8.46.

The following compounds were prepared according to this Typical Procedure.

## 2. 1-Cyclohexylhepta-1,2-dien-3-yl phenyl sulfoxide (**1d**) wmy-3-182

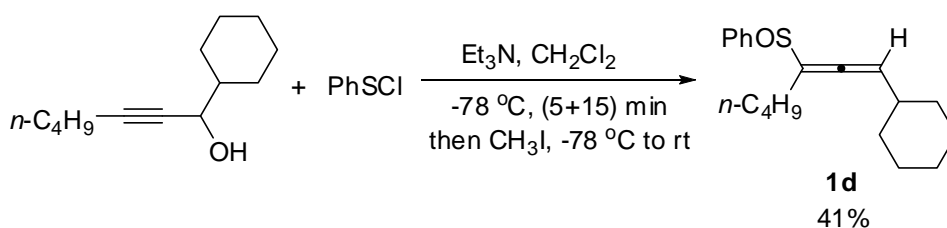

The reaction of 1-cyclohexylhept-2-yn-1-ol (1.9414 g, 10 mmol), triethylamine (1.50 mL,  $d = 0.72\text{ g/mL}$ , 1.08 g, 10.7 mmol), sulfenyl chloride (1.4476 g, 10 mmol), and methyl iodide (0.3 mL,  $d = 2.28\text{ g/mL}$ , 0.684 g, 4.8 mmol) in  $CH_2Cl_2$  (20 mL) at  $-78\text{ }^\circ\text{C}$  afforded **1d** (1.2546 g, 41%) (eluent: petroleum ether / ethyl acetate = 20/1 ~ 10/1): Oil;  $^1H$  NMR (300 MHz,  $CDCl_3$ )  $\delta$  7.67-7.56 (m, 2 H, ArH), 7.56-7.40 (m, 3 H, ArH), 5.73-5.62 (m, 1 H, =CH), 2.32-1.98 (m, 2 H), 1.92-1.58 (m, 6 H), 1.45-0.98 (m, 9 H), 0.80 (t,  $J = 7.1\text{ Hz}$ , 3 H,  $CH_3$ );  $^{13}C$  NMR (75 MHz,  $CDCl_3$ )  $\delta$  200.7, 200.6, 143.9, 143.5, 130.5, 130.4, 128.8, 128.7, 124.6, 124.4, 114.3, 114.1, 104.9, 104.8, 37.5, 37.4, 32.83, 32.80, 32.7, 29.58, 29.56, 25.8, 25.7, 22.8, 22.6, 22.0, 13.6; IR (neat)  $\nu$  ( $cm^{-1}$ ) 3057, 2956, 2926, 2852, 1950, 1584, 1475, 1444, 1082, 1049, 1022; MS (70 eV, EI)  $m/z$  (%) 303 ( $M^++1$ , 8.98), 302 ( $M^+$ , 3.07), 81 (100); Anal. Calcd. for  $C_{19}H_{26}OS$ : C, 75.45, H, 8.66; Found: C, 75.45, H, 8.73.

### 3. 5-Phenylpenta-1,2-dienyl phenyl sulfoxide (**11**)

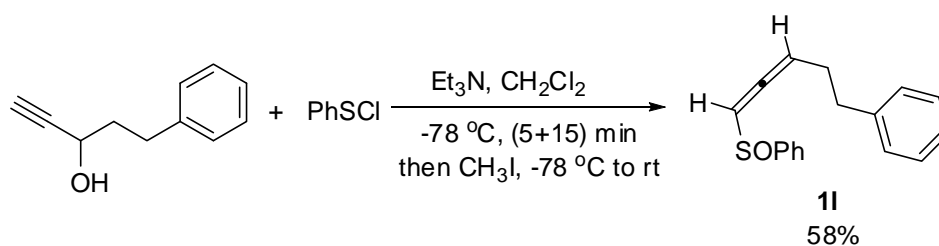

The reaction of 5-phenylpent-1-yn-3-ol (1.6165 g, 10.1 mmol), triethylamine (1.50 mL,  $d = 0.72$  g/mL, 1.08 g, 10.7 mmol), sulfenyl chloride (1.4631 g, 10.1 mmol), and methyl iodide (0.3 mL,  $d = 2.28$  g/mL, 0.684 g, 4.8 mmol) in CH<sub>2</sub>Cl<sub>2</sub> (20 mL) at -78 °C afforded **11** (1.5727 g, 58%) (eluent: petroleum ether / ethyl acetate = 20/1 ~ 10/1): Oil; <sup>1</sup>H NMR (300 MHz, CDCl<sub>3</sub>)  $\delta$  7.70-7.58 (m, 1 H, ArH), 7.58-7.51 (m, 1 H, ArH), 7.51-7.36 (m, 3 H, ArH), 7.34-7.21 (m, 2 H, ArH), 7.21-7.04 (m, 3 H, ArH), 6.08-5.90 (m, 1 H, =CH), 5.77-5.62 (m, 1 H, =CH), 2.79-2.56 (m, 2 H, CH<sub>2</sub>), 2.50-2.24 (m, 2 H, CH<sub>2</sub>); <sup>13</sup>C NMR (75 MHz, CDCl<sub>3</sub>)  $\delta$  203.6, 203.4, 144.6, 144.5, 140.42, 140.38, 130.8, 129.0, 128.3, 128.2, 126.1, 126.0, 124.0, 123.9, 102.9, 98.4, 98.3, 34.6, 29.7, 29.5; IR (neat)  $\nu$  (cm<sup>-1</sup>) 3060, 3026, 2923, 2856, 1748, 1603, 1581, 1496, 1475, 1454, 1443, 1304, 1083, 1046; MS (70 eV, EI)  $m/z$  (%) 268 (M<sup>+</sup>, 1.01), 91 (100); Anal. Calcd. for C<sub>17</sub>H<sub>16</sub>OS: C, 76.08, H, 6.01; Found: C, 75.76, H, 6.05.

### Preparation of Starting 1,2-Allenyl Sulfoxides **1e**, **1f**, and **1g**

#### 1. Deca-3,4-dien-3-yl phenyl sulfoxide (**1e**) wmy-4-153

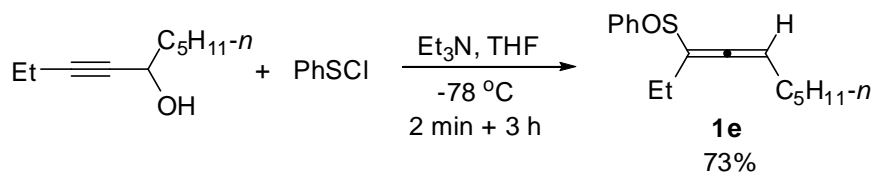

**Typical Procedure**<sup>31</sup>: To a dried three-neck round bottom flask were added dec-3-yn-5-ol (0.8412 g, 5.0 mmol), THF (10 mL), and triethylamine (1.0 mL, d = 0.72 g/mL, 0.72 g, 7.1 mmol) sequentially. After the mixture was cooled to -78 °C, a solution of sulfenyl chloride (1.0117 g, 7.0 mmol) was added dropwise in 2 min. After being stirred at -78 °C for 3 hours, water (10 mL) was added to quench the reaction. Then the mixture was extracted with Et<sub>2</sub>O (20 mL × 3), washed with brine, and dried over anhydrous Na<sub>2</sub>SO<sub>4</sub>. Filtration, evaporation and chromatography on silica gel (eluent: petroleum ether / ethyl acetate = 20/1) of the crude product afforded **1e** (0.9534 g, 73%) as an oil. <sup>1</sup>H NMR (300 MHz, CDCl<sub>3</sub>) δ 7.66-7.26 (m, 5 H, ArH), 5.81-5.66 (m, 1 H, =CH), 2.36-2.05 (m, 3 H), 1.91-1.73 (m, 1 H), 1.55-1.23 (m, 6 H), 1.03-0.82 (m, 6 H, 2 × CH<sub>3</sub>); <sup>13</sup>C NMR (75 MHz, CDCl<sub>3</sub>) δ 201.51, 201.48, 143.9, 143.6, 130.6, 130.5, 128.89, 128.85, 124.5, 124.4, 115.0, 114.9, 99.8, 99.6, 31.25, 31.20, 28.70, 28.67, 22.42, 22.39, 16.42, 16.37, 14.01, 13.98, 12.0; IR (neat) ν (cm<sup>-1</sup>) 3056, 2959, 2930, 2857, 1953, 1578, 1474, 1458, 1443, 1378, 1299, 1085, 1048; MS (70 eV, EI) *m/z* (%) 263 (M<sup>+</sup>+1, 3.66), 262 (M<sup>+</sup>, 17.37), 191 (100); Anal. Calcd. for C<sub>16</sub>H<sub>22</sub>OS: C, 73.23, H, 8.45; Found: C, 72.90, H, 8.52.

The following compounds were prepared according to this Typical Procedure.

## 2. 6-Phenylhexa-2,3-dien-2-yl phenyl sulfoxide (**1f**) wmy-4-154

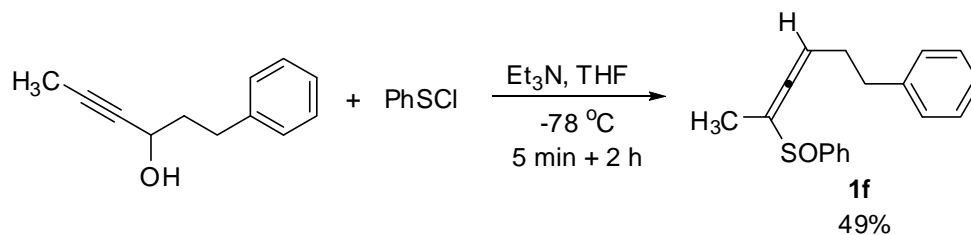

The reaction of 1-phenylhex-4-yn-3-ol (0.8707 g, 5.0 mmol), triethylamine (1.0 mL,  $d = 0.72 \text{ g/mL}$ , 0.72 g, 7.1 mmol), and sulfenyl chloride (1.0214 g, 7.1 mmol) in THF (10 mL) at  $-78^\circ\text{C}$  afforded **1f** (0.6898 g, 49%) (eluent: petroleum ether / ethyl acetate = 20/1): Oil;  $^1\text{H}$  NMR (300 MHz,  $\text{CDCl}_3$ )  $\delta$  7.64-7.55 (m, 1 H, ArH), 7.55-7.24 (m, 6 H, ArH), 7.24-7.12 (m, 3 H, ArH), 5.76-5.56 (m, 1 H, =CH), 2.86-2.65 (m, 2 H,  $\text{CH}_2$ ), 2.57-2.35 (m, 2 H,  $\text{CH}_2$ ), 1.70-1.57 (m, 3 H,  $\text{CH}_3$ );  $^{13}\text{C}$  NMR (75 MHz,  $\text{CDCl}_3$ )  $\delta$  202.12, 202.09, 143.6, 143.4, 140.8, 140.7, 130.72, 130.70, 129.0, 128.54, 128.47, 126.25, 126.16, 124.44, 124.38, 108.8, 108.6, 97.0, 96.7, 35.1, 35.0, 30.4, 30.0, 9.4; IR (neat)  $\nu$  ( $\text{cm}^{-1}$ ) 3060, 3026, 2920, 2856, 1956, 1603, 1580, 1496, 1474, 1453, 1443, 1389, 1090, 1048, 1011; MS (70 eV, EI)  $m/z$  (%) 283 ( $\text{M}^+ + 1$ , 3.58), 282 ( $\text{M}^+$ , 16.45), 177 (100); Anal. Calcd. for  $\text{C}_{18}\text{H}_{18}\text{OS}$ : C, 76.56, H, 6.42; Found: C, 76.77, H, 6.34.

## 3. 2,2-Dimethylnona-3,4-dien-3-yl phenyl sulfoxide (**1g**) wmy-4-97

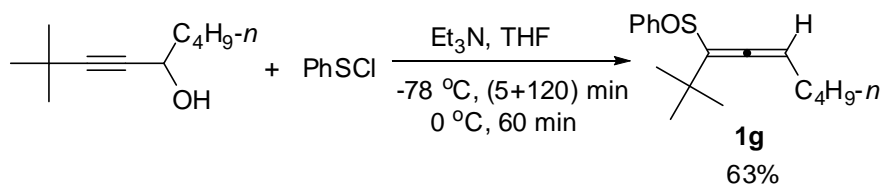

The reaction of 2,2-dimethylnon-3-yn-5-ol (1.6809 g, 10 mmol), triethylamine (1.70 mL,  $d = 0.72$  g/mL, 1.224 g, 12.1 mmol), and sulfenyl chloride (1.7347 g, 12 mmol) in THF (20 mL) at  $-78$  °C afforded **1g** (1.7428 g, 63%) (eluent: petroleum ether / ethyl acetate = 20/1 ~ 10/1): Oil;  $^1\text{H}$  NMR (300 MHz,  $\text{CDCl}_3$ )  $\delta$  7.62-7.53 (m, 2 H, ArH), 7.53-7.38 (m, 3 H, ArH), [5.51 (t,  $J = 6.9$  Hz, 0.58 H, =CH), 5.22 (t,  $J = 7.2$  Hz, 0.45 H, =CH)], 1.96 (q,  $J = 6.8$  Hz, one proton in  $\text{CH}_2$ ), 1.60 (q,  $J = 6.8$  Hz, one proton in  $\text{CH}_2$ ), 1.36-1.22 (m, 11 H,  $3 \times \text{CH}_3 + \text{CH}_2$ ), 1.22-1.10 (m, 1 H, one proton in  $\text{CH}_2$ ), 1.04-0.91 (m, 1 H, one proton in  $\text{CH}_2$ ), [0.87 (t,  $J = 7.1$  Hz, 1.69 H,  $\text{CH}_3$ ), 0.79 (t,  $J = 7.2$  Hz, 1.75 H,  $\text{CH}_3$ )];  $^{13}\text{C}$  NMR (75 MHz,  $\text{CDCl}_3$ )  $\delta$  200.3, 199.6, 144.6, 144.5, 130.34, 130.27, 128.5, 126.5, 125.5, 125.0, 124.7, 100.1, 99.9, 35.3, 35.1, 31.0, 30.5, 30.1, 29.9, 28.1, 27.6, 22.1, 22.0, 13.7, 13.6; IR (neat)  $\nu$  ( $\text{cm}^{-1}$ ) 3059, 2962, 2930, 2870, 1948, 1578, 1475, 1462, 1444, 1391, 1363, 1236, 1085, 1048; MS (70 eV, EI)  $m/z$  (%) 277 ( $\text{M}^++1$ , 1.79), 276 ( $\text{M}^+$ , 9.70), 163 (100); Anal. Calcd. for  $\text{C}_{17}\text{H}_{24}\text{OS}$ : C, 73.86, H, 8.75; Found: C, 73.86, H, 8.89.

**The Reaction of 1,2-Allenylic Sulfoxide 1a Affording  
*E*-4-Iodo-5-phenylthio-4-nonen-3-ol (*E*-2a) wmy-4-40**

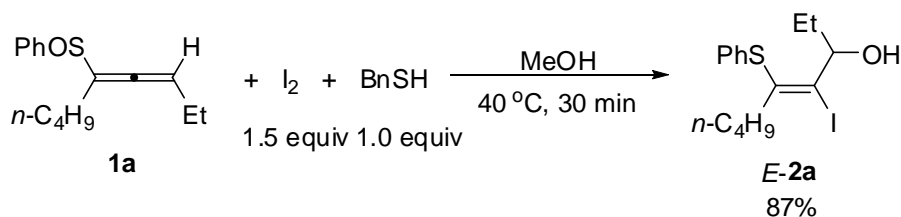

A solution of **1a** (74.9 mg, 0.3 mmol) in MeOH (4 mL) was treated with I<sub>2</sub> (115.2 mg, 0.45 mmol) for 5 min at 40 °C followed by the addition of a solution of BnSH (37.6 mg, 0.3 mmol) in MeOH (2 mL) with stirring. After being stirred at for 30 min, the mixture was quenched with 6 mL of water followed by the addition of a saturated aqueous solution of Na<sub>2</sub>S<sub>2</sub>O<sub>3</sub> at 40 °C. The mixture was extracted with ether (20 mL × 3) and dried over anhydrous Na<sub>2</sub>SO<sub>4</sub>. Filtration, evaporation, and column chromatography on silica gel (petroleum ether/ethyl acetate = 30/1) afforded *E*-**2a** (99.1 mg, 87%): Oil; <sup>1</sup>H NMR (300 MHz, CDCl<sub>3</sub>) δ 7.34-7.20 (m, 5 H, ArH), 4.55 (q, *J* = 6.9 Hz, 1 H, CH), 2.58-2.44 (m, 1 H, one protone in CH<sub>2</sub>), 2.36-2.23 (m, 1 H, one protone in CH<sub>2</sub>), 2.01 (d, *J* = 6.9 Hz, 1 H, OH), 1.76-1.42 (m, 4 H, 2 × CH<sub>2</sub>), 1.34-1.19 (m, 2 H, CH<sub>2</sub>), 0.93-0.81 (m, 6 H, 2 × CH<sub>3</sub>); <sup>13</sup>C NMR (75 MHz, CDCl<sub>3</sub>) δ 137.7, 134.3, 130.4, 129.0, 127.1, 120.1, 74.2, 41.4, 31.0, 29.9, 22.2, 13.8, 9.5; IR (neat) ν (cm<sup>-1</sup>) 3399, 3072, 3058, 2959, 2929, 2872, 2858, 1582, 1477, 1460, 1439, 1379, 1327, 1099, 1058, 1023; MS (70 eV, EI) *m/z* (%) 376 (M<sup>+</sup>, 11.09), 139 (100); HRMS (EI) Calcd for C<sub>15</sub>H<sub>21</sub>OSI (M<sup>+</sup>): 376.0358; Found: 376.0361.

## Preparation of *Z*-1-Iodo-1-alkenyl Ketones *Z*-3a-*Z*-3f

### 1. (*Z*)-4-Iodonon-3-en-5-one (*Z*-3a) wmy-3-83

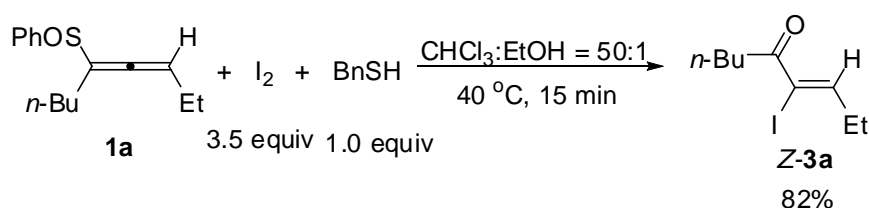



A solution of **1a** (74.8 mg, 0.3 mmol), CHCl<sub>3</sub> (1 mL), and EtOH (30 μL) was treated with I<sub>2</sub> (267.2 mg, 1.05 mmol) for 5 min at 40 °C followed by the addition of a solution of BnSH in CHCl<sub>3</sub> (0.6 M, 0.5 mL) with stirring. After being stirred for 15 min at 40 °C, the mixture was quenched with 6 mL of water followed by the addition of a saturated aqueous solution of Na<sub>2</sub>S<sub>2</sub>O<sub>3</sub>. The mixture was extracted with Et<sub>2</sub>O (20 mL × 3), washed with brine, and dried over anhydrous Na<sub>2</sub>SO<sub>4</sub>. Filtration, evaporation, and column chromatography on silica gel (petroleum ether ~ petroleum ether/ether = 300/1) afforded **Z-3a** (66.1 mg, 82%): Oil; <sup>1</sup>H NMR (300 MHz, CDCl<sub>3</sub>) δ 6.99 (t, *J* = 6.9 Hz, 1 H, =CH), 2.83 (t, *J* = 7.4 Hz, 2 H, COCH<sub>2</sub>), 2.49-2.37 (m, 2 H, CH<sub>2</sub>), 1.69-1.56 (m, 2 H, CH<sub>2</sub>), 1.44-1.23 (m, 2 H, CH<sub>2</sub>), 1.14 (t, *J* = 7.5 Hz, 3 H, CH<sub>3</sub>), 0.92 (t, *J* = 7.4 Hz, 3 H, CH<sub>3</sub>); <sup>13</sup>C NMR (75 MHz, CDCl<sub>3</sub>) δ 194.9, 152.9, 111.9, 37.4, 31.4, 27.0, 22.2, 13.8, 11.9; IR (neat) ν (cm<sup>-1</sup>) 2960, 2929, 2872, 1682, 1604, 1461, 1379, 1290, 1248, 1170, 1121, 1085; MS (70 eV, EI) *m/z* (%) 266 (M<sup>+</sup>, 1.19), 237 (100); HRMS (EI) Calcd for C<sub>9</sub>H<sub>15</sub>OI (M<sup>+</sup>): 266.0168; Found: 266.0167.

#### A large scale reaction:

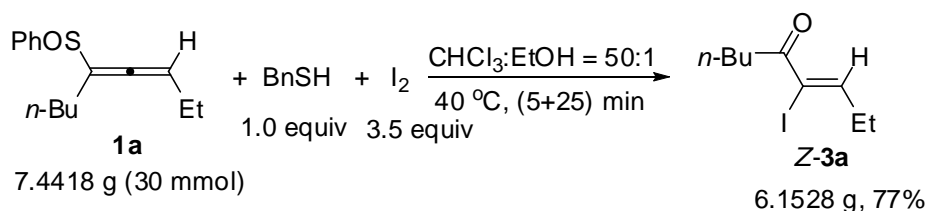

A solution of **1a** (7.4418 g, 30 mmol), CHCl<sub>3</sub> (100 mL), and EtOH (3 mL) was treated with I<sub>2</sub> (26.6772 g, 105 mmol) for 5 min at 40 °C, then a solution of BnSH (3.5 mL, d = 1.06 g/mL, 3.71 g, 30 mmol) in CHCl<sub>3</sub> (50 mL) was added within 5 min.

After being stirred for 25 min at 40 °C, the mixture was quenched with 10 mL of water followed by the addition of a saturated aqueous solution of Na<sub>2</sub>S<sub>2</sub>O<sub>3</sub>. The mixture was extracted with Et<sub>2</sub>O (20 mL × 3), washed with brine, and dried over anhydrous Na<sub>2</sub>SO<sub>4</sub>. Filtration, evaporation, and column chromatography on silica gel (petroleum ether ~ petroleum ether/ether = 300/1) afforded **Z-3a** (6.1528 g, 77%).

The following compounds were prepared according to this procedure.

## 2. (Z)-3-Iodo-1-phenyloct-2-en-4-one (**Z-3b**) wmy-3-170

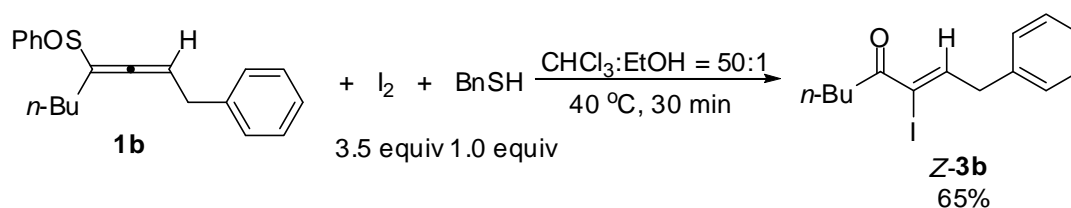

The reaction of **1b** (93.1 mg, 0.3 mmol), 30 μL of EtOH, 1 mL of CHCl<sub>3</sub>, I<sub>2</sub> (266.6 mg, 1.05 mmol), and BnSH in CHCl<sub>3</sub> (0.6 M, 0.5 mL) at 40 °C with stirring for 30 min afforded **Z-3b** (63.8 mg, 65%) (eluent: petroleum ether ~ petroleum ether/ether = 300/1 ~ petroleum ether/ether = 100/1): Oil; <sup>1</sup>H NMR (300 MHz, CDCl<sub>3</sub>) δ 7.40-7.21 (m, 5 H, ArH), 7.11 (t, *J* = 6.9 Hz, 1 H, =CH), 3.77 (d, *J* = 6.6 Hz, 2 H, CH<sub>2</sub>Ar), 2.80 (t, *J* = 7.5 Hz, 2 H, COCH<sub>2</sub>), 1.68-1.55 (m, 2 H, CH<sub>2</sub>), 1.42-1.23 (m, 2 H, CH<sub>2</sub>), 0.90 (t, *J* = 7.5 Hz, 3 H, CH<sub>3</sub>); <sup>13</sup>C NMR (75 MHz, CDCl<sub>3</sub>) δ 194.9, 149.7, 137.1, 128.8, 128.6, 126.9, 113.1, 44.2, 37.5, 26.9, 22.2, 13.8; IR (neat) ν

( $\text{cm}^{-1}$ ) 3063, 3027, 2957, 2926, 2867, 1682, 1598, 1495, 1453, 1251, 1145, 1100; MS (70 eV, EI)  $m/z$  (%) 328 ( $\text{M}^+$ , 20.68), 57 (100); HRMS (EI) Calcd for  $\text{C}_{14}\text{H}_{17}\text{OI}$  ( $\text{M}^+$ ): 328.0324; Found: 328.0329.

### 3. (Z)-4-Iodo-2-methylnon-3-en-5-one (Z-3c) wmy-4-7

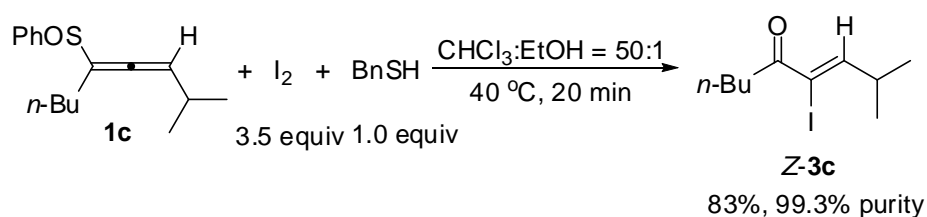

The reaction of **1c** (79.1 mg, 0.3 mmol), 30  $\mu\text{L}$  of EtOH, 1 mL of  $\text{CHCl}_3$ ,  $\text{I}_2$  (267.4 mg, 1.05 mmol), and BnSH in  $\text{CHCl}_3$  (0.6 M, 0.5 mL) at 40  $^\circ\text{C}$  with stirring for 20 min afforded **Z-3c** (70.6 mg, 83%, 99.3% purity) (eluent: petroleum ether ~ petroleum ether/ether = 300/1): Oil;  $^1\text{H}$  NMR (300 MHz,  $\text{CDCl}_3$ )  $\delta$  6.74 (d,  $J = 8.4$  Hz, 1 H, =CH), 2.92-2.77 (m, 3 H,  $\text{COCH}_2 + \text{CH}$ ), 1.77-1.56 (m, 2 H,  $\text{CH}_2$ ), 1.44-1.23 (m, 2 H,  $\text{CH}_2$ ), 1.12 (d,  $J = 6.6$  Hz, 6 H,  $2 \times \text{CH}_3$ ), 0.92 (t,  $J = 7.5$  Hz, 3 H,  $\text{CH}_3$ );  $^{13}\text{C}$  NMR (75 MHz,  $\text{CDCl}_3$ )  $\delta$  195.1, 157.1, 109.6, 37.5, 37.3, 27.0, 22.2, 20.7, 13.8; IR (neat)  $\nu$  ( $\text{cm}^{-1}$ ) 2960, 2931, 2870, 1682, 1602, 1465, 1412, 1382, 1363, 1329, 1267, 1166, 1128, 1086; MS (70 eV, EI)  $m/z$  (%) 280 ( $\text{M}^+$ , 0.76), 237 (100); HRMS (EI) Calcd for  $\text{C}_{10}\text{H}_{17}\text{OI}$  ( $\text{M}^+$ ): 280.0324; Found: 280.0317.

### 4. (Z)-1-Cyclohexyl-2-iodohept-1-en-3-one (Z-3d) wmy-4-9

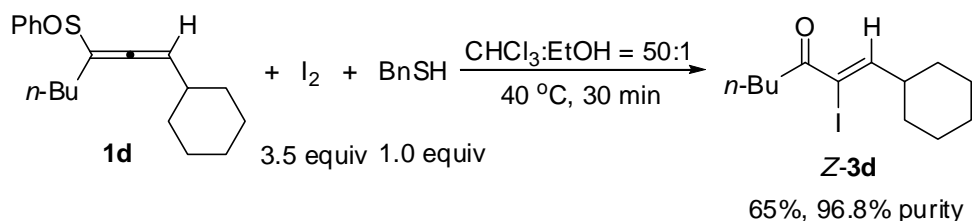

The reaction of **1d** (90.4 mg, 0.3 mmol), 30  $\mu\text{L}$  of EtOH, 1 mL of CHCl<sub>3</sub>, I<sub>2</sub> (267.3 mg, 1.05 mmol), and BnSH in CHCl<sub>3</sub> (0.6 M, 0.5 mL) at 40 °C with stirring for 30 min afforded **Z-3d** (62.0 mg, 65%, 96.8% purity) (eluent: petroleum ether ~ petroleum ether/ether = 300/1): Oil; <sup>1</sup>H NMR (300 MHz, CDCl<sub>3</sub>)  $\delta$  6.75 (d,  $J$  = 8.7 Hz, 1 H, =CH), 2.80 (t,  $J$  = 7.5 Hz, 2 H, COCH<sub>2</sub>), 2.60-2.50 (m, 1 H, CH), 1.87-1.52 (m, 7 H), 1.50-1.13 (m, 7 H), 0.92 (t,  $J$  = 7.2 Hz, 3 H, CH<sub>3</sub>); <sup>13</sup>C NMR (75 MHz, CDCl<sub>3</sub>)  $\delta$  195.2, 155.7, 109.9, 46.7, 37.5, 30.7, 27.1, 25.7, 25.2, 22.3, 13.8; IR (neat)  $\nu$  (cm<sup>-1</sup>) 2959, 2927, 2852, 1682, 1601, 1448, 1315, 1278, 1259, 1224, 1169, 1129, 1088; MS (70 eV, EI)  $m/z$  (%) 321 (M<sup>+</sup>+1, 44.69), 320 (M<sup>+</sup>, 6.73), 95 (100); HRMS (EI) Calcd for C<sub>13</sub>H<sub>21</sub>OI (M<sup>+</sup>): 320.0637; Found: 320.0631.

#### 5. (Z)-4-Iododec-4-en-3-one (**Z-3e**) wmy-4-156

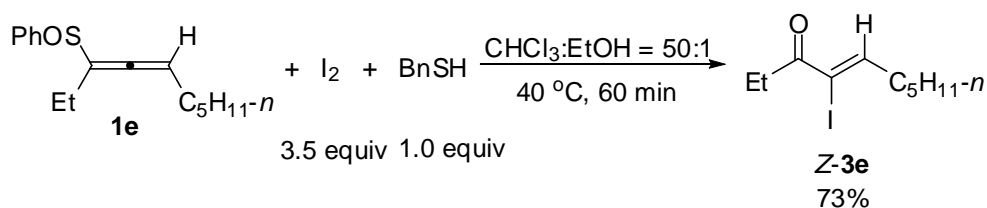

The reaction of **1e** (79.2 mg, 0.3 mmol), 30  $\mu\text{L}$  of EtOH, 1 mL of CHCl<sub>3</sub>, I<sub>2</sub> (267.7 mg, 1.05 mmol), and BnSH in CHCl<sub>3</sub> (0.6 M, 0.5 mL) at 40 °C with stirring for 60 min afforded **Z-3e** (61.7 mg, 73%) (eluent: petroleum ether ~ petroleum ether/ether = 300/1): Oil; <sup>1</sup>H NMR (300 MHz, CDCl<sub>3</sub>)  $\delta$  7.03 (t,  $J$  = 6.8 Hz, 1 H,

=CH), 2.86 (q,  $J = 7.2$  Hz, 2 H, COCH<sub>2</sub>), 2.42 (q,  $J = 7.4$  Hz, 2 H, CH<sub>2</sub>), 1.64-1.44 (m, 2 H, CH<sub>2</sub>), 1.44-1.24 (m, 4 H, 2 × CH<sub>2</sub>), 1.16 (t,  $J = 7.4$  Hz, 3 H, CH<sub>3</sub>), 0.92 (t,  $J = 6.9$  Hz, 3 H, CH<sub>3</sub>); <sup>13</sup>C NMR (75 MHz, CDCl<sub>3</sub>) δ 195.3, 151.9, 112.0, 37.9, 31.4, 31.1, 27.3, 22.4, 13.9, 9.0; IR (neat)  $\nu$  (cm<sup>-1</sup>) 2953, 2929, 2858, 1688, 1603, 1458, 1373, 1166, 1119, 1061; MS (70 eV, EI)  $m/z$  (%) 281 (M<sup>+</sup>+1, 3.34), 280 (M<sup>+</sup>, 27.12), 57 (100); HRMS (EI) Calcd for C<sub>10</sub>H<sub>17</sub>OI (M<sup>+</sup>): 280.0324; Found: 280.0325.

### 6. (Z)-3-Iodo-6-phenylhex-3-en-2-one (Z-3f) wmy-4-159

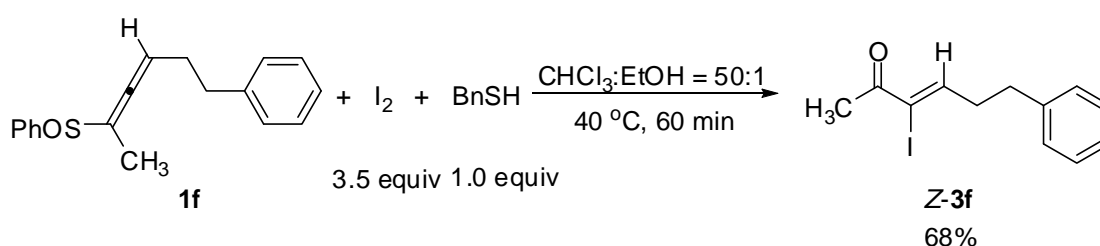

The reaction of **1f** (85.2 mg, 0.3 mmol), 30  $\mu$ L of EtOH, 1 mL of CHCl<sub>3</sub>, I<sub>2</sub> (267.4 mg, 1.05 mmol), and BnSH in CHCl<sub>3</sub> (0.6 M, 0.5 mL) at 40 °C with stirring for 60 min afforded **Z-3f** (61.9 mg, 68%) (eluent: petroleum ether ~ petroleum ether/ether = 100/1 ~ petroleum ether/ether = 50/1): Oil; <sup>1</sup>H NMR (300 MHz, CDCl<sub>3</sub>) δ 7.37-7.28 (m, 2 H, ArH), 7.27-7.19 (m, 3 H, ArH), 7.03 (t,  $J = 6.8$  Hz, 1 H, =CH), 2.90-2.82 (m, 2 H, COCH<sub>2</sub>), 2.80-2.69 (m, 2 H, CH<sub>2</sub>), 2.46 (s, 3 H, CH<sub>3</sub>); <sup>13</sup>C NMR (75 MHz, CDCl<sub>3</sub>) δ 192.4, 152.0, 140.1, 128.5, 128.2, 126.4, 113.1, 39.4, 33.5, 25.2; IR (neat)  $\nu$  (cm<sup>-1</sup>) 3061, 3026, 2924, 2858, 1682, 1603, 1496, 1454, 1428, 1356, 1299, 1228, 1168, 1087, 1030; MS (70 eV, EI)  $m/z$  (%) 301 (M<sup>+</sup>+1, 1.03), 300 (M<sup>+</sup>, 8.51), 91 (100); HRMS (EI) Calcd for C<sub>12</sub>H<sub>13</sub>OI (M<sup>+</sup>): 300.0011; Found: 300.0013.

## Preparation of 2-Iodo-2-enals with the Same Substituents at the 3-Position 3h-3k

### 1. 2-Cyclohexylidene-2-iodoacetaldehyde (**3h**)<sup>32</sup>

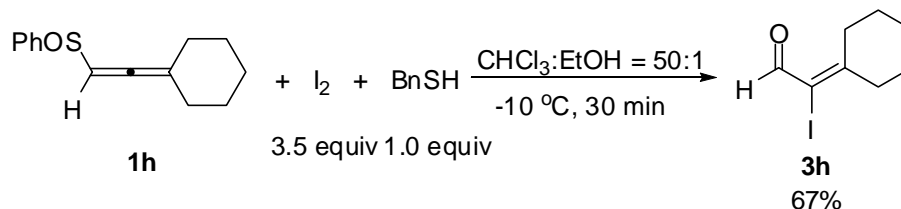

The reaction of **1h** (69.4 mg, 0.3 mmol), 30  $\mu$ L of EtOH, 1 mL of CHCl<sub>3</sub>, I<sub>2</sub> (267.3 mg, 1.05 mmol), and BnSH in CHCl<sub>3</sub> (0.6 M, 0.5 mL) at -10 °C with stirring for 30 min afforded **3h** (49.9 mg, 67%) (eluent: petroleum ether ~ petroleum ether/ether = 300/1 ~ petroleum ether/ether = 80/1): Oil; <sup>1</sup>H NMR (300 MHz, CDCl<sub>3</sub>)  $\delta$  9.17 (d,  $J$  = 0.9 Hz, 1 H, CHO), 2.98 (t,  $J$  = 5.1 Hz, 2 H, =CCH<sub>2</sub>), 2.74 (t,  $J$  = 5.7 Hz, 2 H, =CCH<sub>2</sub>), 1.68-1.59 (m, 6 H, 3  $\times$  CH<sub>2</sub>); <sup>13</sup>C NMR (75 MHz, CDCl<sub>3</sub>)  $\delta$  183.8, 171.8, 105.5, 44.5, 33.6, 28.7, 27.8, 26.1; IR (neat)  $\nu$  (cm<sup>-1</sup>) 2931, 2855, 1678, 1577, 1445, 1388, 1348, 1314, 1268, 1235, 1222, 1133, 1109, 1091, 1058; MS (70 eV, EI)  $m/z$  (%) 250 (M<sup>+</sup>, 100).

### 2. 3-Ethyl-2-iodopent-2-enal (**3i**) wmy-3-186

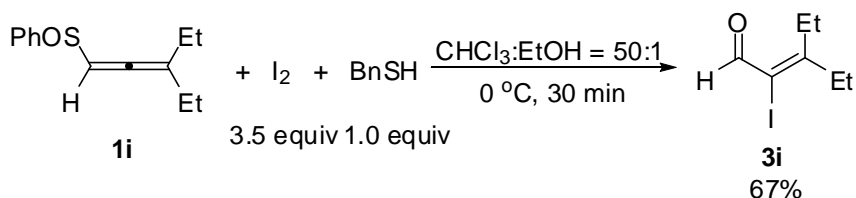

The reaction of **1i** (66.6 mg, 0.3 mmol), 30  $\mu$ L of EtOH, 1 mL of CHCl<sub>3</sub>, I<sub>2</sub> (267.1 mg, 1.05 mmol), and BnSH in CHCl<sub>3</sub> (0.6 M, 0.5 mL) at 0 °C with stirring for 30 min afforded **3i** (48.2 mg, 67%) (eluent: petroleum ether ~ petroleum ether/ether = 300/1

~petroleum ether/ether = 100/1): Oil;  $^1\text{H}$  NMR (300 MHz,  $\text{CDCl}_3$ )  $\delta$  9.07 (s, 1 H, CHO), 2.84 (q,  $J = 7.6$  Hz, 2 H,  $=\text{CCH}_2$ ), 2.59 (q,  $J = 7.6$  Hz, 2 H,  $=\text{CCH}_2$ ), 1.21 (t,  $J = 7.7$  Hz, 3 H,  $\text{CH}_3$ ), 1.14 (t,  $J = 7.7$  Hz, 3 H,  $\text{CH}_3$ );  $^{13}\text{C}$  NMR (75 MHz,  $\text{CDCl}_3$ )  $\delta$  184.6, 174.8, 106.4, 37.8, 27.0, 14.6, 11.3; IR (neat)  $\nu$  ( $\text{cm}^{-1}$ ) 2972, 2932, 2872, 1684, 1578, 1460, 1379, 1205, 1122, 1084, 1063; MS (70 eV, EI)  $m/z$  (%) 238 ( $\text{M}^+$ , 100); HRMS (EI) Calcd for  $\text{C}_7\text{H}_{11}\text{OI}$  ( $\text{M}^+$ ): 237.9855; Found: 237.9850.

### 3. 3-Butyl-2-iodohept-2-enal (**3j**) wmy-3-191

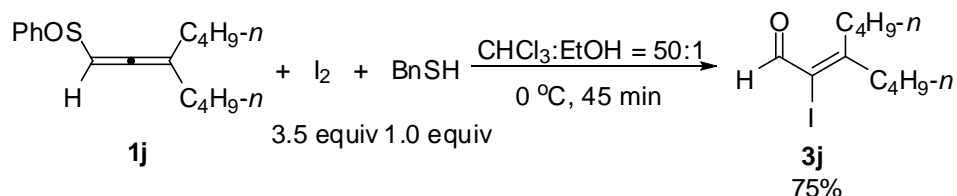

The reaction of **1j** (82.3 mg, 0.3 mmol), 30  $\mu\text{L}$  of EtOH, 1 mL of  $\text{CHCl}_3$ ,  $\text{I}_2$  (267.4 mg, 1.05 mmol), and BnSH in  $\text{CHCl}_3$  (0.6 M, 0.5 mL) at 0  $^\circ\text{C}$  with stirring for 45 min afforded **3j** (66.1 mg, 75%) (eluent: petroleum ether ~ petroleum ether/ether = 300/1 ~ petroleum ether/ether = 200/1): Oil;  $^1\text{H}$  NMR (300 MHz,  $\text{CDCl}_3$ )  $\delta$  9.05 (s, 1 H, CHO), 2.80 (t,  $J = 7.8$  Hz, 2 H,  $=\text{CCH}_2$ ), 2.55 (t,  $J = 7.7$  Hz, 2 H,  $=\text{CCH}_2$ ), 1.62-1.33 (m, 8 H,  $4 \times \text{CH}_2$ ), 1.02-0.88 (m, 6 H,  $2 \times \text{CH}_3$ );  $^{13}\text{C}$  NMR (75 MHz,  $\text{CDCl}_3$ )  $\delta$  184.6, 172.9, 107.2, 44.7, 34.1, 32.3, 29.3, 22.9, 22.5, 13.8, 13.7; IR (neat)  $\nu$  ( $\text{cm}^{-1}$ ) 2958, 2930, 2861, 2721, 1683, 1578, 1465, 1381, 1078; MS (70 eV, EI)  $m/z$  (%) 294 ( $\text{M}^+$ , 45.99), 55 (100); HRMS (EI) Calcd for  $\text{C}_{11}\text{H}_{19}\text{OI}$  ( $\text{M}^+$ ): 294.0481; Found: 294.0488.

### 4. 2-Cyclohexylidene-2-iodoacetaldehyde (**3h**) wmy-4-71

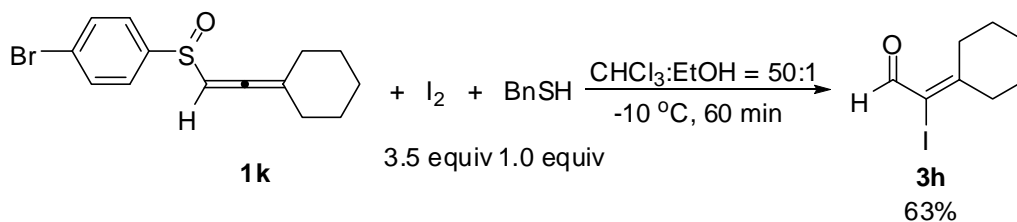

The reaction of **1k** (93.4 mg, 0.3 mmol), 30  $\mu\text{L}$  of EtOH, 1 mL of CHCl<sub>3</sub>, I<sub>2</sub> (266.8 mg, 1.05 mmol), and BnSH in CHCl<sub>3</sub> (0.6 M, 0.5 mL) at -10 °C with stirring for 60 min afforded **3h** (47.6 mg, 63%) (eluent: petroleum ether ~ petroleum ether/ether = 300/1 ~ petroleum ether/ether = 80/1): Oil; <sup>1</sup>H NMR (300 MHz, CDCl<sub>3</sub>)  $\delta$  9.10 (s, 1 H, CHO), 2.91 (t,  $J$  = 5.4 Hz, 2 H, =CCH<sub>2</sub>), 2.67 (t,  $J$  = 6.0 Hz, 2 H, =CCH<sub>2</sub>), 1.74-1.55 (m, 6 H, 3  $\times$  CH<sub>2</sub>); <sup>13</sup>C NMR (75 MHz, CDCl<sub>3</sub>)  $\delta$  183.8, 171.8, 105.5, 44.5, 33.6, 28.7, 27.8, 26.1.

## Preparation of Z-2-Iodo-2-enals Z-3l-Z-3o

### 1. (Z)-2-Iodo-5-phenylpent-2-enal (Z-3l) wmy-3-173

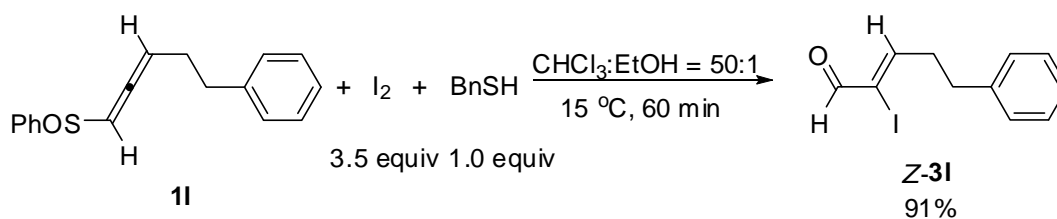

The reaction of **1l** (80.9 mg, 0.3 mmol), 30  $\mu\text{L}$  of EtOH, 1 mL of CHCl<sub>3</sub>, I<sub>2</sub> (266.3 mg, 1.05 mmol), and BnSH in CHCl<sub>3</sub> (0.6 M, 0.5 mL) at 15 °C with stirring for 60 min afforded **Z-3l** (78.3 mg, 91%) (eluent: petroleum ether ~ petroleum ether/ether = 300/1 ~ petroleum ether/ether = 100/1): Oil; <sup>1</sup>H NMR (300 MHz, CDCl<sub>3</sub>)  $\delta$  8.56 (s, 1 H, CHO), 7.38-7.10 (m, 6 H, ArH + =CH), 2.92-2.76 (m, 4 H, 2  $\times$  CH<sub>2</sub>); <sup>13</sup>C NMR (75 MHz, CDCl<sub>3</sub>)  $\delta$  187.5, 160.9, 139.6, 128.4, 128.1, 126.2, 112.2, 37.7, 33.0; IR



(neat)  $\nu$  ( $\text{cm}^{-1}$ ) 3081, 3063, 3026, 2924, 2846, 2816, 2724, 1694, 1604, 1496, 1454, 1188, 1113, 1075; MS (70 eV, EI)  $m/z$  (%) 286 ( $\text{M}^+$ , 2.95), 91 (100); HRMS (EI) Calcd for  $\text{C}_{11}\text{H}_{11}\text{OI}$  ( $\text{M}^+$ ): 285.9855; Found: 285.9852.

### A large scale reaction:

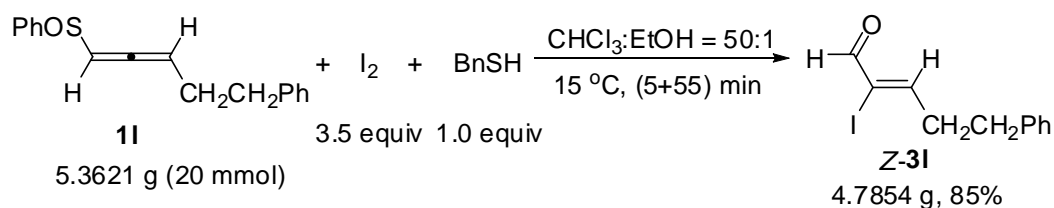

A solution of **1I** (5.3621 g, 20 mmol),  $\text{CHCl}_3$  (70 mL), and EtOH (2 mL) was treated with  $\text{I}_2$  (17.7872 g, 70 mmol) for 5 min at 15 °C. Then a solution of BnSH (2.35 mL,  $d = 1.06$  g/mL, 2.491 g, 20 mmol) in  $\text{CHCl}_3$  (30 mL) was added within 5 min. After being stirred for 55 min at 15 °C, the mixture was quenched with 20 mL of water followed by the addition of a saturated aqueous solution of  $\text{Na}_2\text{S}_2\text{O}_3$ . The mixture was extracted with  $\text{Et}_2\text{O}$  (50 mL  $\times$  3), washed with brine, and dried over anhydrous  $\text{Na}_2\text{SO}_4$ . Filtration, evaporation, and column chromatography on silica gel (petroleum ether  $\sim$  petroleum ether/ether = 300/1  $\sim$  petroleum ether/ether = 100/1) afforded **Z-3I** (4.7854 g, 84%).

### 2. (Z)-2-Iodoct-2-enal (Z-3m) wmy-3-172

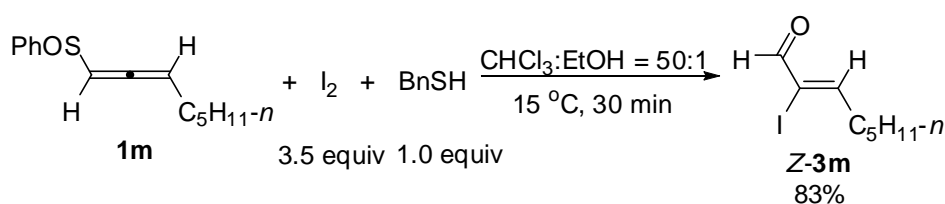

The reaction of **1m** (70.6 mg, 0.3 mmol), 30  $\mu$ L of EtOH, 1 mL of CHCl<sub>3</sub>, I<sub>2</sub> (267.7 mg, 1.05 mmol), and BnSH in CHCl<sub>3</sub> (0.6 M, 0.5 mL) at 15 °C with stirring for 30 min afforded **Z-3m** (63.4 mg, 83%) (eluent: petroleum ether ~ petroleum ether/ether = 300/1 ~ petroleum ether/ether = 100/1): Oil; <sup>1</sup>H NMR (300 MHz, CDCl<sub>3</sub>)  $\delta$  8.68 (s, 1 H, CHO), 7.21 (t,  $J$  = 7.1 Hz, 1 H, =CH), 2.55 (q,  $J$  = 7.3 Hz, 2 H, CH<sub>2</sub>), 1.63-1.50 (m, 2 H, CH<sub>2</sub>), 1.49-1.31 (m, 4 H, 2  $\times$  CH<sub>2</sub>), 0.92 (t,  $J$  = 6.8 Hz, 3 H, CH<sub>3</sub>); <sup>13</sup>C NMR (75 MHz, CDCl<sub>3</sub>)  $\delta$  187.9, 162.7, 111.7, 36.5, 31.3, 27.1, 22.3, 13.8; IR (neat)  $\nu$  (cm<sup>-1</sup>) 2956, 2927, 2858, 2810, 2726, 1695, 1606, 1465, 1380, 1199, 1141, 1082; MS (70 eV, EI)  $m/z$  (%) 252 (M<sup>+</sup>, 12.81), 41 (100); HRMS (EI) Calcd for C<sub>8</sub>H<sub>13</sub>OI (M<sup>+</sup>): 252.0011; Found: 252.0014.

### 3. (Z)-2-Iododec-2-enal (**Z-3n**) wmy-3-176

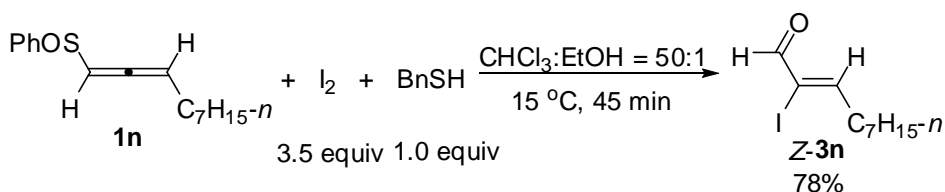

The reaction of **1n** (78.9 mg, 0.3 mmol), 30  $\mu$ L of EtOH, 1 mL of CHCl<sub>3</sub>, I<sub>2</sub> (266.5 mg, 1.05 mmol), and BnSH in CHCl<sub>3</sub> (0.6 M, 0.5 mL) at 15 °C with stirring for 45 min afforded **Z-3n** (65.7 mg, 78%) (eluent: petroleum ether ~ petroleum ether/ether = 300/1 ~ petroleum ether/ether = 100/1): Oil; <sup>1</sup>H NMR (300 MHz, CDCl<sub>3</sub>)  $\delta$  8.68 (s, 1 H, CHO), 7.20 (t,  $J$  = 6.9 Hz, 1 H, =CH), 2.55 (q,  $J$  = 7.3 Hz, 2 H, CH<sub>2</sub>), 1.65-1.50 (m, 2 H, CH<sub>2</sub>), 1.46-1.17 (m, 8 H, 4  $\times$  CH<sub>2</sub>), 0.89 (t,  $J$  = 6.8 Hz, 3 H, CH<sub>3</sub>); <sup>13</sup>C NMR (75 MHz, CDCl<sub>3</sub>)  $\delta$  187.9, 162.7, 111.7, 36.5, 31.6, 29.2, 28.9, 27.4, 22.5, 14.0; IR (neat)  $\nu$  (cm<sup>-1</sup>) 2926, 2856, 2806, 2726, 1698, 1605, 1465, 1379, 1185, 1140,

1086; MS (70 eV, EI)  $m/z$  (%) 280 ( $M^+$ , 1.76), 55 (100); HRMS (EI) Calcd for  $C_{10}H_{17}OI$  ( $M^+$ ): 280.0324; Found: 280.0324.

#### 4. (Z)-2-Iodo-4-phenylbut-2-enal (Z-3o) wmy-4-50

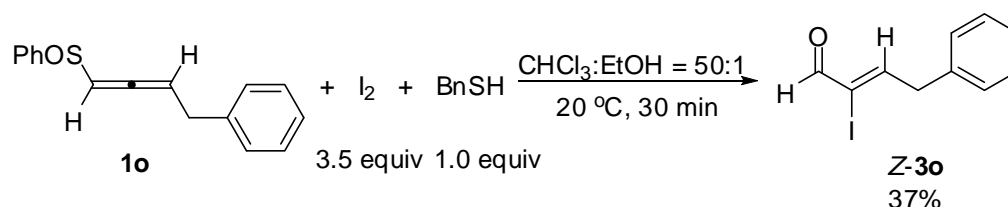

The reaction of **1o** (76.6 mg, 0.3 mmol), 30  $\mu$ L of EtOH, 1 mL of  $CHCl_3$ ,  $I_2$  (267.4 mg, 1.05 mmol), and BnSH in  $CHCl_3$  (0.6 M, 0.5 mL) at 20 °C with stirring for 30 min afforded **Z-3o** (30.5 mg, 37%) (eluent: petroleum ether ~ petroleum ether/ether = 300/1 ~ petroleum ether/ether = 80/1): Oil;  $^1H$  NMR (300 MHz,  $CDCl_3$ )  $\delta$  8.62 (s, 1 H, CHO), 7.42-7.20 (m, 6 H, ArH + =CH), 3.82 (d,  $J = 7.2$  Hz, 2 H,  $CH_2Ar$ );  $^{13}C$  NMR (75 MHz,  $CDCl_3$ )  $\delta$  187.9, 160.2, 136.4, 129.0, 128.7, 127.2, 112.1, 42.7; IR (neat)  $\nu$  ( $cm^{-1}$ ) 3027, 2922, 2820, 1695, 1599, 1494, 1453, 1113, 1072; MS (70 eV, EI)  $m/z$  (%) 272 ( $M^+$ , 33.00), 115 (100); HRMS (EI) Calcd for  $C_{10}H_9OI$  ( $M^+$ ): 271.9698; Found: 271.9692.

#### Preparation of *E*-2-iodo-3-phenyl-2-enals *E*-3p- *E*-3q

##### 1. (*E*)-2-Iodo-3-phenylbut-2-enal (*E*-3p) wmy-4-68

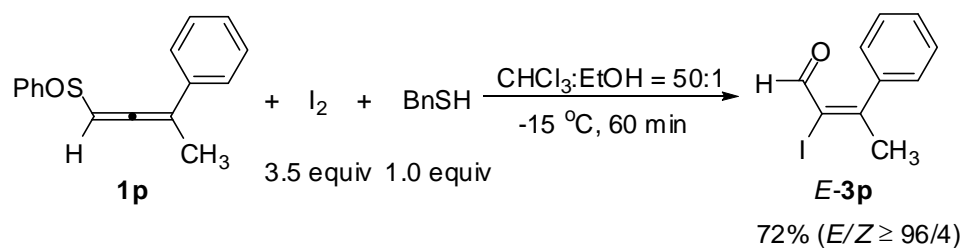

The reaction of **1p** (76.7 mg, 0.3 mmol), 30  $\mu$ L of EtOH, 1 mL of CHCl<sub>3</sub>, I<sub>2</sub> (267.6 mg, 1.05 mmol), and BnSH in CHCl<sub>3</sub> (0.6 M, 0.5 mL) at -15 °C stirred for 60 min afforded the crude product (The *E/Z* ratio of the product is 96/4 as determined by <sup>1</sup>H NMR analysis with CH<sub>2</sub>Br<sub>2</sub> as the internal standard.). Purification (eluent: petroleum ether ~ petroleum ether/ether = 300/1 ~ petroleum ether/ether = 100/1) afforded **E-3p** (58.9 mg, 72%, *E/Z* ≥ 98/2, if any): Oil; <sup>1</sup>H NMR (300 MHz, CDCl<sub>3</sub>)  $\delta$  8.46 (s, 1 H, CHO), 7.48-7.39 (m, 3 H, ArH), 7.30-7.21 (m, 2 H, ArH), 2.63 (s, 3 H, CH<sub>3</sub>); <sup>13</sup>C NMR (75 MHz, CDCl<sub>3</sub>)  $\delta$  186.9, 167.3, 139.2, 129.3, 128.6, 128.2, 110.3, 33.6; IR (neat)  $\nu$  (cm<sup>-1</sup>) 3054, 3021, 2923, 2847, 2718, 1674, 1578, 1560, 1489, 1442, 1375, 1123, 1025; MS (70 eV, EI) *m/z* (%) 272 (M<sup>+</sup>, 50.38), 115 (100); Anal. Calcd. for C<sub>10</sub>H<sub>9</sub>OI: C, 44.14, H, 3.33; Found: C, 44.17, H, 3.44.

## 2. (*E*)-2-Iodo-3-phenylpent-2-enal (**E-3q**) Wmy-4-113

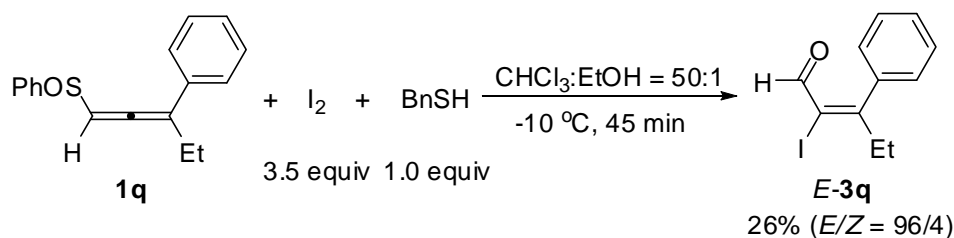

The reaction of **1q** (80.7 mg, 0.3 mmol), 30  $\mu$ L of EtOH, 1 mL of CHCl<sub>3</sub>, I<sub>2</sub> (267.5 mg, 1.05 mmol), and BnSH in CHCl<sub>3</sub> (0.6 M, 0.5 mL) at -10 °C stirred for 45 min afforded the crude product (The *E/Z* ratio of the product is 96/4 as determined by

$^1\text{H}$  NMR analysis with  $\text{CH}_2\text{Br}_2$  as the internal standard.). Purification (eluent: petroleum ether ~ petroleum ether/ether = 300/1 ~ petroleum ether/ether = 100/1) afforded only *E*-**3q** (22.8 mg, 26%): Oil;  $^1\text{H}$  NMR (300 MHz,  $\text{CDCl}_3$ )  $\delta$  8.40 (s, 1 H, CHO), 7.48-7.33 (m, 3 H, ArH), 7.25-7.14 (m, 2 H, ArH), 2.94 (q,  $J = 7.5$  Hz, 2 H,  $\text{CH}_2$ ), 1.05 (t,  $J = 7.5$  Hz, 3 H,  $\text{CH}_3$ );  $^{13}\text{C}$  NMR (75 MHz,  $\text{CDCl}_3$ )  $\delta$  187.3, 172.3, 138.1, 129.2, 128.55, 128.49, 109.4, 39.5, 11.3; IR (neat)  $\nu$  ( $\text{cm}^{-1}$ ) 3051, 2973, 2932, 2849, 2724, 1679, 1575, 1561, 1442, 1377, 1284, 1128, 1068; MS (70 eV, EI)  $m/z$  (%) 286 ( $\text{M}^+$ , 100); HRMS (EI) Calcd for  $\text{C}_{11}\text{H}_{11}\text{OI}$  ( $\text{M}^+$ ): 285.9855; Found: 285.9856.

#### The reaction of **3** with 2,4- dinitrophenylhydrazine affording **4**

##### 1. (*E*)-1-(2,4-Dinitrophenyl)-2-((*Z*)-4-iodonon-3-en-5-ylidene)hydrazine (**4a**)

###### wmy-4-61

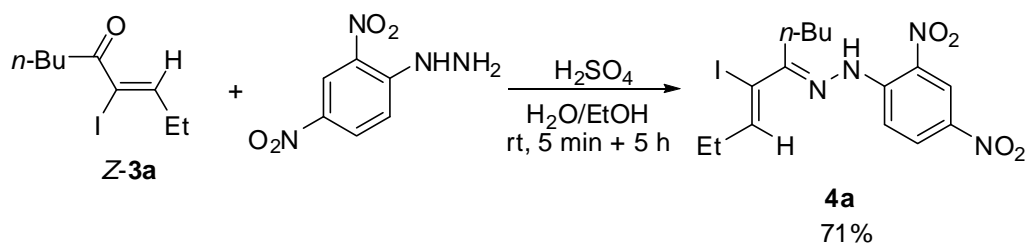

To a solution of 2,4-dinitrophenylhydrazine (198.4 mg, 1.0 mmol),  $\text{H}_2\text{SO}_4$  (1.5 mL, 98%), EtOH (15 mL), and  $\text{H}_2\text{O}$  (45 mL) was added a solution of *Z*-**3a** (291.8 mg, 1.1 mmol) in EtOH (5 mL) dropwise within 5 min. After being stirred for 5 hours at room temperature, the mixture was extracted with EtOAc (50 mL  $\times$  3), washed with brine, and dried over anhydrous  $\text{Na}_2\text{SO}_4$ . Filtration, evaporation, and column

chromatography on silica gel (petroleum ether/ethyl acetate = 50/1) afforded **4a** (318.4 mg, 71%) as solid: mp 113.1-114.0 °C (EtOAc/*n*-hexane); <sup>1</sup>H NMR (300 MHz, CDCl<sub>3</sub>) δ 11.38 (s, 1 H, NH), 9.14 (d, *J* = 2.7 Hz, 1 H, ArH), 8.42-8.34 (dd, *J*<sub>1</sub> = 9.5 Hz, *J*<sub>2</sub> = 2.5 Hz, 1 H, ArH), 8.16 (d, *J* = 9.6 Hz, 1 H, ArH), 6.37 (t, *J* = 6.8 Hz, 1 H, =CH), 2.72 (t, *J* = 7.8 Hz, 2 H, CH<sub>2</sub>), 2.57-2.43 (m, 2 H, CH<sub>2</sub>), 1.67-1.44 (m, 4 H, 2 × CH<sub>2</sub>), 1.15 (t, *J* = 7.5 Hz, 3 H, CH<sub>3</sub>), 1.01 (t, *J* = 7.1 Hz, 3 H, CH<sub>3</sub>); <sup>13</sup>C NMR (75 MHz, CDCl<sub>3</sub>) δ 154.1, 145.5, 145.0, 138.5, 130.2, 129.8, 123.3, 117.6, 106.8, 31.7, 28.0, 27.2, 22.9, 13.7, 12.6; IR (KBr) ν (cm<sup>-1</sup>) 3312, 3106, 2963, 2932, 2872, 1617, 1593, 1503, 1422, 1335, 1311, 1257, 1221, 1135, 1110; MS (70 eV, EI) *m/z* (%) 446 (M<sup>+</sup>, 12.42), 41 (100); Anal. Calcd. for C<sub>15</sub>H<sub>19</sub>IN<sub>4</sub>O<sub>4</sub>: C, 40.37, H, 4.29, N, 12.56; Found: C, 40.58, H, 4.29, N, 12.53.

## 2. (*E*)-1-(2,4-Dinitrophenyl)-2-((*Z*)-2-iodo-5-phenylpent-2-enylidene)hydrazine

### (4I) wmy-3-195

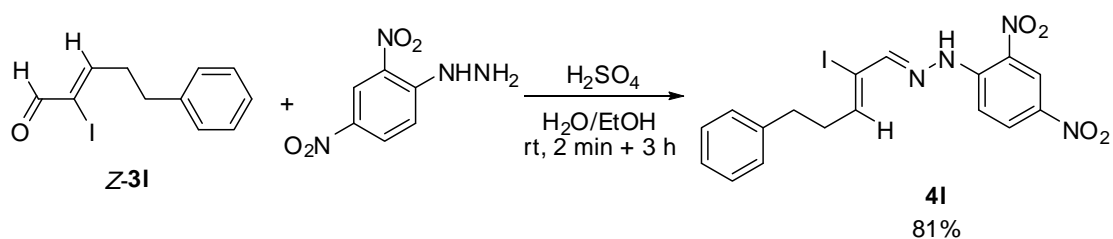

To a solution of 2,4-dinitrophenylhydrazine (199.1 mg, 1.0 mmol), H<sub>2</sub>SO<sub>4</sub> (1.5 mL, 98%), EtOH (15 mL), and H<sub>2</sub>O (45 mL) was added a solution of **Z-3I** (314.8 mg, 1.1 mmol) in EtOH (5 mL) dropwise within 3 min. After being stirred for 3 hours at room temperature, the mixture was extracted with EtOAc (50 mL × 3), washed with

brine, and dried over anhydrous  $\text{Na}_2\text{SO}_4$ . Filtration, evaporation, and column chromatography on silica gel (petroleum ether/ethyl acetate = 5/1) afforded **41** (379.1 mg, 81%) as solid: mp 193.9-194.2 °C (EtOAc/*n*-hexane);  $^1\text{H}$  NMR (300 MHz,  $\text{CDCl}_3$ )  $\delta$  11.27 (s, 1 H, NH), 9.13 (d,  $J = 2.4$  Hz, 1 H, ArH), 8.42-8.33 (dd,  $J_1 = 9.0$  Hz,  $J_2 = 2.6$  Hz, 1 H, ArH), 8.06 (d,  $J = 9.3$  Hz, 1 H, ArH), 7.39 (s, 1 H, =CH), 7.37-7.28 (m, 2 H, ArH), 7.26-7.18 (m, 3 H, ArH), 6.52-6.45 (m, 1 H, =CH), 2.93-2.75 (m, 4 H,  $2 \times \text{CH}_2$ );  $^{13}\text{C}$  NMR (75 MHz,  $\text{CDCl}_3$ )  $\delta$  149.0, 147.5, 144.9, 140.3, 138.6, 130.2, 129.6, 128.6, 128.4, 126.4, 123.3, 117.4, 101.8, 38.1, 34.0; IR (KBr)  $\nu$  ( $\text{cm}^{-1}$ ) 3414, 3303, 3090, 3022, 2930, 2858, 1616, 1585, 1515, 1504, 1421, 1332, 1314, 1139, 1091, 1077; MS (70 eV, EI)  $m/z$  (%) 466 ( $\text{M}^+$ , 4.17), 91 (100); Anal. Calcd. for  $\text{C}_{17}\text{H}_{15}\text{IN}_4\text{O}_4$ : C, 43.79, H, 3.24, N, 12.02; Found: C, 43.90, H, 3.13, N, 11.88.

## The Synthetic Application of the Z-3a Affording 5-6

### 1. (*E*)-4-Phenylnon-3-en-5-one (**5**) Wmy-4-30

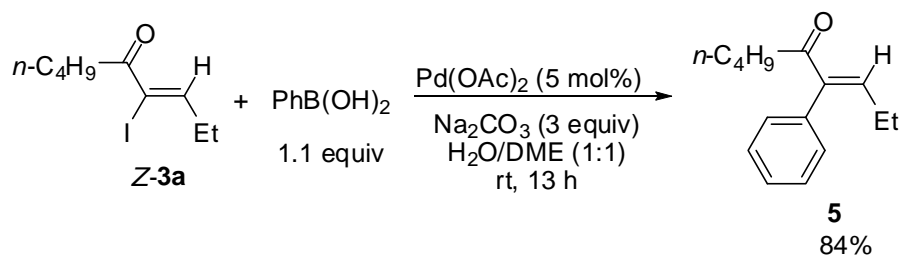

To a solution of **Z-3a** (79.9 mg, 0.3 mmol) in 1,2-dimethoxyethane (1.5 mL) were added  $\text{Na}_2\text{CO}_3$  (95.8 mg, 0.9 mmol),  $\text{H}_2\text{O}$  (1.5 mL), phenyl boronic acid (40.4 mg,

0.33 mmol), and Pd(OAc)<sub>2</sub> (3.5 mg, 0.016 mmol) sequentially. The mixture was stirring at room temperature under nitrogen for 13 h. After the reaction complete, 10 mL of ethyl ether was added. Filtration and evaporation, then column chromatography on silica gel (eluent: petroleum ether/ethyl ether = 100:1) gave **5** (54.8 mg, 84%): Oil; <sup>1</sup>H NMR (300 MHz, CDCl<sub>3</sub>) δ 7.42-7.26 (m, 3 H, ArH), 7.14-7.06 (m, 2 H, ArH), 6.84 (t, *J* = 7.5 Hz, 1 H, =CH), 2.54 (t, *J* = 7.5 Hz, 2 H, CH<sub>2</sub>), 2.13-1.98 (m, 2 H, CH<sub>2</sub>), 1.63-1.50 (m, 2 H, CH<sub>2</sub>), 1.37-1.20 (m, 2 H, CH<sub>2</sub>), 1.01 (t, *J* = 7.5 Hz, 3 H, CH<sub>3</sub>), 0.87 (t, *J* = 7.4 Hz, 3 H, CH<sub>3</sub>); <sup>13</sup>C NMR (75 MHz, CDCl<sub>3</sub>) δ 201.3, 144.1, 142.2, 136.3, 129.5, 128.2, 127.3, 39.2, 26.6, 22.9, 22.3, 13.9, 13.3; IR (neat) ν (cm<sup>-1</sup>) 3051, 3024, 2960, 2933, 2873, 1690, 1619, 1597, 1494, 1459, 1442, 1378, 1266, 1143, 1072, 1029; MS (70 eV, EI) *m/z* (%) 216 (M<sup>+</sup>, 6.03), 131 (100); HRMS (EI) Calcd for C<sub>15</sub>H<sub>20</sub>O (M<sup>+</sup>): 216.1514; Found: 216.1518.

## 2. (*E*)-4-(Phenylethynyl)non-3-en-5-one (**6**) Wmy-4-60

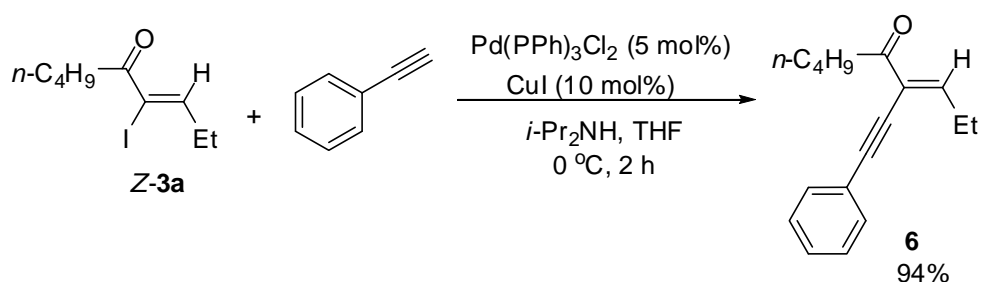

To a solution of **Z-3a** (80.3 mg, 0.3 mmol) in THF (1 mL) were added Pd(PPh<sub>3</sub>)<sub>2</sub>Cl<sub>2</sub> (10.6 mg, 0.015 mmol), a solution of phenylacetylene (46.1 mg, 0.45 mmol) in THF (1 mL), CuI (5.8 mg, 0.03 mmol), and a solution of *i*-Pr<sub>2</sub>NH (48.6 mg,



0.48 mmol) in THF (1 mL) sequentially. The mixture was stirring at 0 °C over a period of 2 h under nitrogen. After the reaction complete, 5 mL of ethyl ether was added. Filtration, evaporation and column chromatography on silica gel (eluent: petroleum ether/ethyl ether = 80:1) gave **6** (68.4 mg, 94%): Oil; <sup>1</sup>H NMR (300 MHz, CDCl<sub>3</sub>) δ 7.57-7.43 (m, 2 H, ArH), 7.42-7.27 (m, 3 H, ArH), 7.13 (t, *J* = 7.7 Hz, 1 H, =CH), 2.85 (t, *J* = 7.4 Hz, 2 H, CH<sub>2</sub>), 2.58-2.45 (m, 2 H, CH<sub>2</sub>), 1.73-1.60 (m, 2 H, CH<sub>2</sub>), 1.46-1.30 (m, 2 H, CH<sub>2</sub>), 1.13 (t, *J* = 7.7 Hz, 3 H, CH<sub>3</sub>), 0.94 (t, *J* = 7.4 Hz, 3 H, CH<sub>3</sub>); <sup>13</sup>C NMR (75 MHz, CDCl<sub>3</sub>) δ 197.8, 151.9, 131.3, 128.5, 128.3, 123.9, 122.9, 97.0, 84.2, 40.0, 26.1, 24.2, 22.3, 13.9, 12.6; IR (neat) ν (cm<sup>-1</sup>) 2960, 2933, 2873, 1700, 1601, 1587, 1490, 1459, 1442, 1378, 1254, 1165, 1141, 1099, 1067, 1019; MS (70 eV, EI) *m/z* (%) 240 (M<sup>+</sup>, 31.03), 57 (100); HRMS (EI) Calcd for C<sub>17</sub>H<sub>20</sub>O (M<sup>+</sup>): 240.1514; Found: 240.1512.

### Experiments for Mechanistic Study:

#### 1. CH<sub>3</sub><sup>18</sup>OH as additive for the reaction wmy-4-119

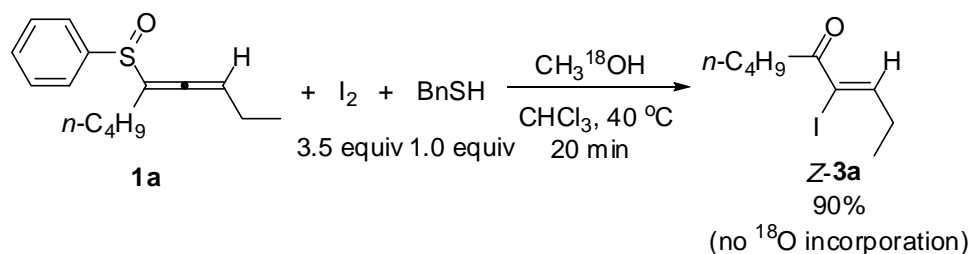

A solution of **1a** (74.2 mg, 0.3 mmol), CHCl<sub>3</sub> (1 mL), and CH<sub>3</sub><sup>18</sup>OH (30 μL) was treated with I<sub>2</sub> (267.4 mg, 1.05 mmol) for 5 min at 40 °C followed by the addition of a

solution of BnSH in  $\text{CHCl}_3$  (0.6 M, 0.5 mL) with stirring. After being stirred for 20 min at 40 °C, the mixture was quenched with 6 mL of water followed by the addition of a saturated aqueous solution of  $\text{Na}_2\text{S}_2\text{O}_3$ . The mixture was extracted with  $\text{Et}_2\text{O}$  (20 mL  $\times$  3), washed with brine, and dried over anhydrous  $\text{Na}_2\text{SO}_4$ . Filtration, evaporation, and column chromatography on silica gel (petroleum ether ~ petroleum ether/ether = 300/1) afforded **Z-3a** (71.6 mg, 90%): Oil;  $^1\text{H}$  NMR (300 MHz,  $\text{CDCl}_3$ )  $\delta$  7.00 (t,  $J$  = 6.8 Hz, 1 H, =CH), 2.83 (t,  $J$  = 7.5 Hz, 2 H,  $\text{COCH}_2$ ), 2.51-2.36 (m, 2 H,  $\text{CH}_2$ ), 1.71-1.54 (m, 2 H,  $\text{CH}_2$ ), 1.44-1.22 (m, 2 H,  $\text{CH}_2$ ), 1.15 (t,  $J$  = 7.5 Hz, 3 H,  $\text{CH}_3$ ), 0.92 (t,  $J$  = 7.2 Hz, 3 H,  $\text{CH}_3$ ).

## 2. Isotopic distribution experiments

### 1). Synthesis of Nona-3,4-dien-5-yl phenyl sulfoxide- $^{18}\text{O}$ **1a- $^{18}\text{O}$**

wmy-5-62, wmy-5-65

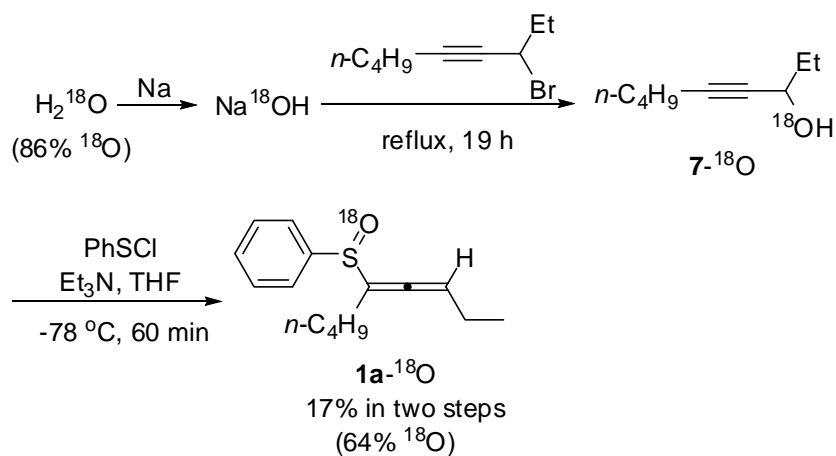

Na (0.4611 g, 2.0 mmol) was added to 1.0 mL of  $^{18}\text{O}$ -labelled water (86%  $\text{H}_2^{18}\text{O}$ ) in a reaction tube. Then 3-bromonon-4-yne (1.0153 g, 5.0 mmol) was added into the tube in a glove box. The resulting mixture was refluxed for 19 h with continuous stirring under  $\text{N}_2$  atmosphere. The resulting mixture was allowed to cool down naturally to room temperature followed by quenching with water (5 mL), extracted with  $\text{Et}_2\text{O}$  (10 mL  $\times$  3), washed with brine, and dried over anhydrous  $\text{Na}_2\text{SO}_4$ . Filtration, evaporation and chromatography on silica gel (eluent: petroleum ether/ethyl acetate = 10/1) of the impurity crude product **7**- $^{18}\text{O}$  (0.3134 g) as an oil.

To a dried reaction tube were added crude product non-4-yn-3-ol ( $^{18}\text{O}$ ) **7**- $^{18}\text{O}$  (0.3134 g) prepared above, THF (10 mL), and triethylamine (0.4 mL,  $d = 0.72 \text{ g/mL}$ , 0.288 g, 2.85 mmol) sequentially under  $\text{N}_2$  atmosphere. After the mixture was cooled to  $-78 \text{ }^\circ\text{C}$ , a solution of sulfenyl chloride (0.3821 g, 2.64 mmol) was added dropwise within 2 min. After being stirred at  $-78 \text{ }^\circ\text{C}$  for 60 min, water (5 mL) was added to quench the reaction. The resulting mixture was extracted with  $\text{Et}_2\text{O}$  (10 mL  $\times$  3), washed by brine, dried over anhydrous  $\text{Na}_2\text{SO}_4$ . Filtration, evaporation and chromatography on silica gel (eluent: petroleum ether / ethyl acetate = 20/1) of the product afforded **1a**- $^{18}\text{O}$  (0.2174 g, 17% in two steps, 64%  $^{18}\text{O}$ ) as an oil:  $^1\text{H}$  NMR (300 MHz,  $\text{CDCl}_3$ )  $\delta$  7.70-7.56 (m, 2 H, ArH), 7.56-7.36 (m, 3 H, ArH), 5.83-5.66 (m, 1 H, =CH), 2.29-2.07 (m, 3 H,  $\text{CH}_2$  + one proton in  $\text{CH}_2$ ), 1.93-1.70 (m, 1 H, one proton in  $\text{CH}_2$ ), 1.40-1.14 (m, 4 H,  $2 \times \text{CH}_2$ ), 1.14-0.96 (m, 3 H,  $\text{CH}_3$ ), 0.90-0.73 (m, 3 H,  $\text{CH}_3$ ); IR (neat)  $\nu$  ( $\text{cm}^{-1}$ ) 3057, 2961, 2931, 2872, 1951, 1581, 1475, 1457, 1443, 1378, 1322, 1303, 1083, 1049, 1022; MS (70 eV, EI)  $m/z$  (%) 250 ( $\text{M} (^{18}\text{O})^+$ , 30.46),

248 (M ( $^{16}\text{O}$ ) $^+$ , 15.12), 221 ((M ( $^{18}\text{O}$ )-Et) $^+$ , 100), 219 ((M ( $^{16}\text{O}$ )-Et) $^+$ , 46.94); HRMS (EI) Calcd for  $\text{C}_{15}\text{H}_{20}^{16}\text{OS}$  (M $^+$ ): 248.1235; Found: 248.1232; HRMS (EI) Calcd for  $\text{C}_{15}\text{H}_{20}^{18}\text{OS}$  (M $^+$ ): 250.1277; Found: 250.1279.

The  $^{18}\text{O}$ % of **1a**- $^{18}\text{O}$  was determined by MS spectrum. The natural abundance of the stable isotopes of some common elements has been reported by literatures. The presence and number of sulphur atoms is usually indicated by the contribution of  $^{34}\text{S}$  to the M+2 peak. Various combinations of C, H, O will thus give rise to the intensity of the M+2 peak. According to the theoretical calculations, the ratio  $\text{C}_{15}\text{H}_{20}^{16}\text{OS} : \text{C}_{15}\text{H}_{20}^{18}\text{OS} = 100:4.5$ . Thus the intensity of M+2 ( $\text{C}_{15}\text{H}_{20}^{18}\text{OS}$ ) peak will be 4.5 percent of the intensity of the molecular peak M ( $\text{C}_{15}\text{H}_{20}^{16}\text{OS}$ ). The relative abundances of 221 [M ( $^{18}\text{O}$ )-Et] $^+$ , 219 [(M ( $^{16}\text{O}$ )-Et) $^+$  of **1a**- $^{18}\text{O}$  are 100, 46.94. (The intensity of (M-Et) $^+$  could be calculated due to the contribution from Et to M+2 is extremely small.) The  $^{18}\text{O}$ % of **1a**- $^{18}\text{O}$  can be calculated as follow:  $(100-46.94*4.5\%)/(100-46.94*4.5\%+46.94)=67.6\%$  (See pages 102-104).

In additional, the spurious contributions to the isotope peak intensities from weak background peaks or from impurities in the sample must be considered. The spurious contribution of **1a** to M+2:  $(3.65-45.44*4.5\%)/(3.65-45.44*4.5\%+45.44)=3.4\%$  (See pages 106-107).

So the  $^{18}\text{O}$ % of **1a**- $^{18}\text{O}$  is  $67.\%-3.41\% \approx 64\%$ .

**(Z)-4-Iodonon-3-en-5-one-<sup>18</sup>O Z-3a-<sup>18</sup>O wmy-5-66**

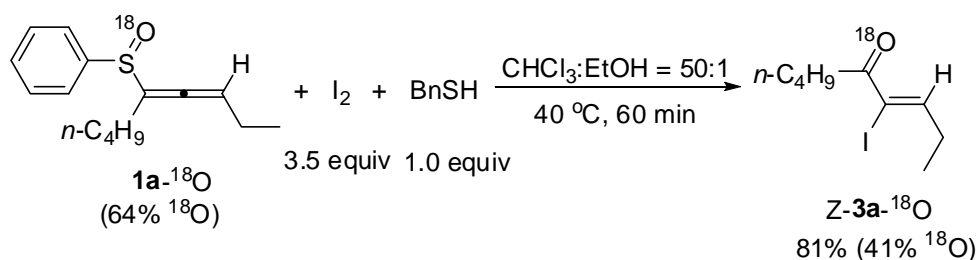

A solution of **1a-<sup>18</sup>O** (89.4 mg, 0.36 mmol, 64% <sup>18</sup>O), CHCl<sub>3</sub> (1.2 mL), and EtOH (36 μL) was treated with I<sub>2</sub> (320.7 mg, 1.26 mmol) for 5 min at 40 °C followed by the addition of a solution of BnSH in CHCl<sub>3</sub> (44.7mg, 0.36 mmol, 0.5 mL) with stirring. After being stirred for 60 min at 40 °C, the mixture was quenched with 6 mL of water followed by the addition of a saturated aqueous solution of Na<sub>2</sub>S<sub>2</sub>O<sub>3</sub>. The mixture was extracted with Et<sub>2</sub>O (20 mL × 3), washed with brine, and dried over anhydrous Na<sub>2</sub>SO<sub>4</sub>. Filtration, evaporation, and column chromatography on silica gel (petroleum ether ~ petroleum ether/ether = 300/1) afforded **Z-3a-<sup>18</sup>O** (77.4 mg, 81%, 41% <sup>18</sup>O): Oil; <sup>1</sup>H NMR (300 MHz, CDCl<sub>3</sub>) δ 6.99 (t, *J* = 6.9 Hz, 1 H, =CH), 2.82 (t, *J* = 7.5 Hz, 2 H, COCH<sub>2</sub>), 2.49-2.36 (m, 2 H, CH<sub>2</sub>), 1.70-1.53 (m, 2 H, CH<sub>2</sub>), 1.41-1.28 (m, 2 H, CH<sub>2</sub>), 1.14 (t, *J* = 7.5 Hz, 3 H, CH<sub>3</sub>), 0.93 (t, *J* = 7.4 Hz, 3 H, CH<sub>3</sub>); <sup>13</sup>C NMR (75 MHz, CDCl<sub>3</sub>) δ 195.0, 152.9, 111.9, 37.5, 31.5, 27.1, 22.3, 13.8, 12.0; IR (neat) ν (cm<sup>-1</sup>) 2959, 2932, 2872, 1682, 1605, 1457, 1413, 1378, 1323, 1280, 1171, 1121, 1085, 1019; MS (70 eV, EI) *m/z* (%) 268 (M (<sup>18</sup>O)<sup>+</sup>, 0.91), 266 (M (<sup>16</sup>O)<sup>+</sup>, 1.36), 239 ((M (<sup>18</sup>O)-Et)<sup>+</sup>, 65.81), 237 ((M (<sup>16</sup>O)-Et)<sup>+</sup>, 91.50), 53 (100); HRMS (EI) Calcd for C<sub>9</sub>H<sub>15</sub><sup>16</sup>OI (M<sup>+</sup>): 266.0168; Found: 266.0171; HRMS (EI) Calcd for C<sub>9</sub>H<sub>15</sub><sup>18</sup>OI (M<sup>+</sup>):

268.0210; Found: 268.0204. The  $^{18}\text{O}$ % of  $Z\text{-3a-}^{18}\text{O}$  was determined by MS spectrum:  
41.8%-0.6%  $\approx$  41% (see pages 110-114).

***E*-4-Iodo-5-phenylthio-4-nonen-3-ol- $^{18}\text{O}$  (*E*-2a- $^{18}\text{O}$ ) wmy-6-44**

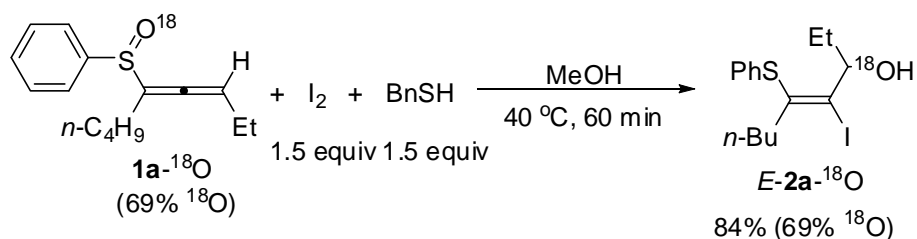

A solution of  $\text{1a-}^{18}\text{O}$  (163.2 mg, 0.65 mmol, 69%  $^{18}\text{O}$ ) in MeOH (8 mL) was treated with  $\text{I}_2$  (248.3 mg, 0.98 mmol) for 5 min at 40  $^\circ\text{C}$  followed by the addition of a solution of  $\text{BnSH}$  (121.0 mg, 0.98 mmol) in MeOH (2 mL) with stirring. After being stirred at for 60 min, the mixture was quenched with 5 mL of water at 40  $^\circ\text{C}$  followed by the addition of a saturated aqueous solution of  $\text{Na}_2\text{S}_2\text{O}_3$ . The mixture was extracted with ether (10 mL  $\times$  3), washed with brine, and dried over anhydrous  $\text{Na}_2\text{SO}_4$ . Filtration, evaporation, and column chromatography on silica gel (petroleum ether/ethyl acetate = 20/1) afforded  $\text{E-2a-}^{18}\text{O}$  (208.0 mg, 84%, 69%  $^{18}\text{O}$ ): Oil;  $^1\text{H}$  NMR (300 MHz,  $\text{CDCl}_3$ )  $\delta$  7.42-7.16 (m, 5 H, ArH), 4.56 (t,  $J$  = 6.8 Hz, 1 H, CH), 2.58-2.44 (m, 1 H, one proton in  $\text{CH}_2$ ), 2.36-2.22 (m, 1 H, one proton in  $\text{CH}_2$ ), 2.01 (bs, 1 H, OH), 1.74-1.40 (m, 4 H, 2  $\times$   $\text{CH}_2$ ), 1.34-1.16 (m, 2 H,  $\text{CH}_2$ ), 0.94-0.77 (m, 6 H, 2  $\times$   $\text{CH}_3$ );  $^{13}\text{C}$  NMR (75 MHz,  $\text{CDCl}_3$ )  $\delta$  137.6, 134.3, 130.3, 129.0, 127.0, 120.1, 74.2, 41.3, 30.9, 29.9, 22.2, 13.8, 9.5; IR (neat)  $\nu$  ( $\text{cm}^{-1}$ ) 3386, 3058, 2959, 2929, 2872, 1582, 1476, 1461, 1439, 1379, 1327, 1237, 1098, 1055, 1024, 1002; MS (70 eV, EI)

$m/z$  (%) 378 ( $M$  ( $^{18}\text{O}$ ) $^+$ , 3.07), 376 ( $M$  ( $^{16}\text{O}$ ) $^+$ , 1.20), 141 (100); HRMS (EI) Calcd for  $\text{C}_{15}\text{H}_{21}^{18}\text{OSI}$  ( $M^+$ ): 378.0400; Found: 378.408; HRMS (EI) Calcd for  $\text{C}_{15}\text{H}_{21}^{16}\text{OSI}$  ( $M^+$ ): 376.0358; Found: 376.0352. The  $^{18}\text{O}$ % of  $E$ -**2a**- $^{18}\text{O}$  was determined by MS spectrum: 71.5%-1.7%  $\approx$  69% (see pages 117-121).

**$E$ -**2a**- $^{18}\text{O}$  reacted with 45% HI aqueous affording  $Z$ -**3a**: wmy-6-45:**

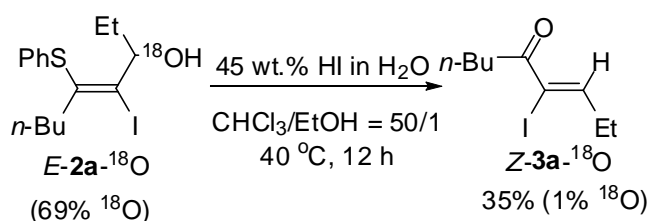

A solution of  $E$ -**2a**- $^{18}\text{O}$  (123.8 mg, 0.33 mmol, 69%  $^{18}\text{O}$ ),  $\text{CHCl}_3$  (6 mL), and EtOH (0.12 mL) was treated with 45 wt.% HI in  $\text{H}_2\text{O}$  (0.66 mmol, 188  $\mu\text{L}$ ) for 12 hours at 40  $^\circ\text{C}$ . The reaction was quenched with 5 mL of water, extracted with  $\text{Et}_2\text{O}$  (10 mL  $\times$  3), washed with brine, and dried over anhydrous  $\text{Na}_2\text{SO}_4$ . Filtration, evaporation, and column chromatography on silica gel (petroleum ether/ether = 300/1) afforded  $Z$ -**3a**- $^{18}\text{O}$  (30.5 mg, 35%, 1%  $^{18}\text{O}$ ): Oil;  $^1\text{H}$  NMR (300 MHz,  $\text{CDCl}_3$ )  $\delta$  6.99 (t,  $J = 6.8$  Hz, 1 H, =CH), 2.83 (t,  $J = 7.5$  Hz, 2 H,  $\text{COCH}_2$ ), 2.52-2.36 (m, 2 H,  $\text{CH}_2$ ), 1.74-1.56 (m, 2 H,  $\text{CH}_2$ ), 1.46-1.28 (m, 2 H,  $\text{CH}_2$ ), 1.15 (t,  $J = 7.5$  Hz, 3 H,  $\text{CH}_3$ ), 0.92 (t,  $J = 7.4$  Hz, 3 H,  $\text{CH}_3$ );  $^{13}\text{C}$  NMR (75 MHz,  $\text{CDCl}_3$ )  $\delta$  195.0, 153.0, 111.9, 37.5, 31.5, 27.1, 22.3, 13.8, 12.0; MS (70 eV, EI)  $m/z$  (%) 268 ( $M$  ( $^{18}\text{O}$ ) $^+$ , 0.04), 266 ( $M$  ( $^{16}\text{O}$ ) $^+$ , 1.16), 239 ( $(M$  ( $^{18}\text{O}$ )-Et) $^+$ , 1.84), 237 ( $(M$  ( $^{16}\text{O}$ )-Et) $^+$ , 100). The  $^{18}\text{O}$ % of  $Z$ -**3a**- $^{18}\text{O}$  was determined by MS spectrum: 1.8%-0.6%  $\approx$  1% (See pages 122 and 123).

### 3. 4-Bromophenthyll alcohol as additive for the reaction wmy-4-109

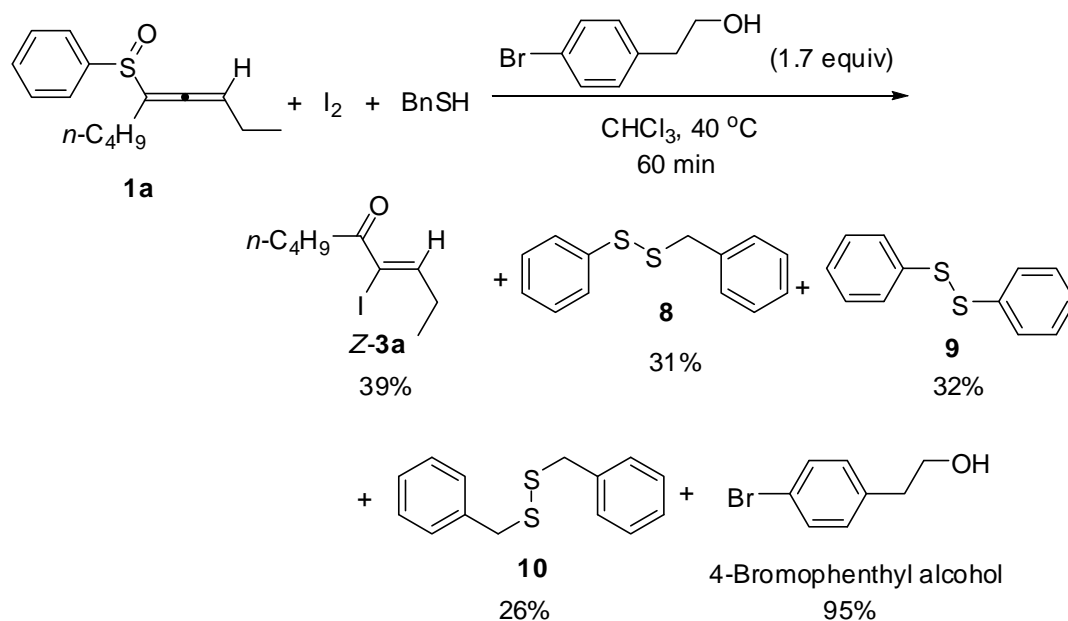

A solution of **1a** (75.1 mg, 0.3 mmol),  $CHCl_3$  (1 mL), and 4-bromophenthyll alcohol (101.9 mg, 0.51 mmol) was treated with  $I_2$  (266.8 mg, 1.05 mmol) for 5 min at  $40\text{ }^\circ\text{C}$  followed by the addition of a solution of BnSH in  $CHCl_3$  (0.6 M, 0.5 mL) with stirring. After being stirred for 60 min at  $40\text{ }^\circ\text{C}$ , the mixture was quenched with 6 mL of water followed by the addition of a saturated aqueous solution of  $Na_2S_2O_3$ . The mixture was extracted with  $Et_2O$  ( $20\text{ mL} \times 3$ ), washed with brine, and dried over anhydrous  $Na_2SO_4$ . Filtration, evaporation, and column chromatography on silica gel (petroleum ether ~ petroleum ether/ether = 300/1 ~ petroleum ether/ethyl acetate = 10/1) afforded **Z-3a** (31.3 mg, 39%), **8**<sup>33</sup> (21.9 mg, 31%), **9** (10.5 mg, 32%), **10** (9.6 mg, 26%), and 4-bromophenthyll alcohol (96.8 mg, 95%).



**Z-3a**: Oil;  $^1\text{H}$  NMR (300 MHz,  $\text{CDCl}_3$ )  $\delta$  7.00 (t,  $J = 6.8$  Hz, 1 H, =CH), 2.83 (t,  $J = 7.4$  Hz, 2 H,  $\text{COCH}_2$ ), 2.50-2.36 (m, 2 H,  $\text{CH}_2$ ), 1.72-1.54 (m, 2 H,  $\text{CH}_2$ ), 1.45-1.24 (m, 2 H,  $\text{CH}_2$ ), 1.15 (t,  $J = 7.7$  Hz, 3 H,  $\text{CH}_3$ ), 0.92 (t,  $J = 7.2$  Hz, 3 H,  $\text{CH}_3$ ).

**8<sup>33</sup>**: Oil;  $^1\text{H}$  NMR (300 MHz,  $\text{CDCl}_3$ )  $\delta$  7.50-7.39 (m, 2 H, ArH), 7.34-7.12 (m, 8 H, ArH), 3.93 (s, 2 H,  $\text{CH}_2$ );  $^{13}\text{C}$  NMR (75 MHz,  $\text{CDCl}_3$ )  $\delta$  137.0, 136.6, 129.4, 128.9, 128.5, 127.7, 127.5, 126.8, 43.4; IR (neat)  $\nu$  ( $\text{cm}^{-1}$ ) 3060, 3028, 2925, 2852, 1945, 1876, 1578, 1494, 1476, 1453, 1438, 1299, 1230, 1199, 1068, 1024; MS (70 eV, EI)  $m/z$  (%) 233 ( $\text{M}^+ + 1$ , 2.82), 232 ( $\text{M}^+$ , 17.13), 91 (100).

**9**: Oil; CAS: 882-33-7.  $^1\text{H}$  NMR (300 MHz,  $\text{CDCl}_3$ )  $\delta$  7.54-7.45 (m, 4 H, ArH), 7.36-7.14 (m, 6 H, ArH);  $^{13}\text{C}$  NMR (75 MHz,  $\text{CDCl}_3$ )  $\delta$  137.0, 129.0, 127.5, 127.1; IR (neat)  $\nu$  ( $\text{cm}^{-1}$ ) 3072, 3058, 2926, 2852, 1578, 1476, 1438, 1296, 1068, 1023; MS (70 eV, EI)  $m/z$  (%) 219 ( $\text{M}^+ + 1$ , 6.45), 218 ( $\text{M}^+$ , 50.76), 109 (100).

**10**: Oil; CAS: 3076-69-5.  $^1\text{H}$  NMR (300 MHz,  $\text{CDCl}_3$ )  $\delta$  7.38-7.17 (m, 10 H, ArH), 3.59 (s, 4 H,  $2 \times \text{CH}_2$ );  $^{13}\text{C}$  NMR (75 MHz,  $\text{CDCl}_3$ )  $\delta$  137.3, 129.4, 128.4, 127.4, 43.3; IR (neat)  $\nu$  ( $\text{cm}^{-1}$ ) 3084, 3061, 3028, 2956, 2923, 2849, 1601, 1494, 1453, 1414, 1229, 1198, 1070, 1028; MS (70 eV, EI)  $m/z$  (%) 247 ( $\text{M}^+ + 1$ , 2.67), 246 ( $\text{M}^+$ , 14.02), 91 (100).

4-Bromophenethyl alcohol: Oil; CAS: 4654-39-1.  $^1\text{H}$  NMR (300 MHz,  $\text{CDCl}_3$ )  $\delta$  7.40 (d,  $J = 8.1$  Hz, 2 H, ArH), 7.06 (d,  $J = 8.1$  Hz, 2 H, ArH), 3.77 (t,  $J = 6.0$  Hz, 2 H,  $\text{CH}_2$ ), 2.76 (t,  $J = 6.0$  Hz, 2 H,  $\text{CH}_2$ ), 2.29 (bs, 1 H, OH);  $^{13}\text{C}$  NMR (75 MHz,  $\text{CDCl}_3$ )  $\delta$  137.5, 131.4, 130.6, 120.1, 63.0, 38.4.

#### 4. The reaction of 1-benzyl-2-phenyldisulfane **8** with I<sub>2</sub>

wmy-5-137

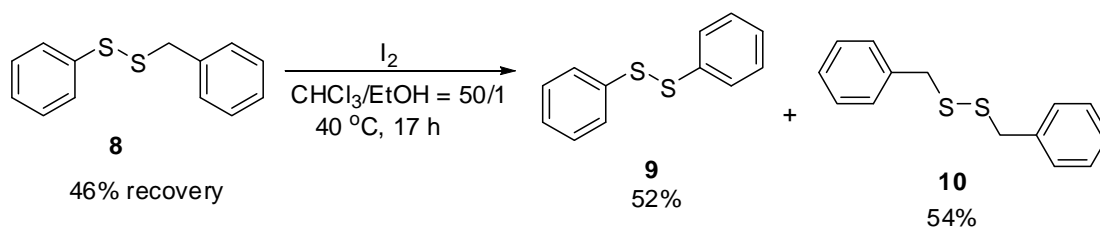

A solution of **8** (232.6 mg, 1.0 mmol), CHCl<sub>3</sub> (10 mL), and EtOH (0.2 mL) was treated with I<sub>2</sub> (255.1 mg, 1.0 mmol) at 40 °C with stirring. After being stirred for 17 h at 40 °C, the mixture was quenched with a saturated aqueous solution of Na<sub>2</sub>S<sub>2</sub>O<sub>3</sub>. The mixture was extracted with Et<sub>2</sub>O (20 mL × 3) and dried over anhydrous Na<sub>2</sub>SO<sub>4</sub>. Filtration, evaporation, and column chromatography on silica gel (petroleum ether) afforded, **8** (107.8 mg, 46%), **9** (57.1 mg, 52%), **10** (64.9 mg, 54%).

**8**: Oil; <sup>1</sup>H NMR (300 MHz, CDCl<sub>3</sub>) δ 7.50-7.36 (m, 2 H, ArH), 7.32-7.10 (m, 8 H, ArH), 3.91 (s, 2 H, CH<sub>2</sub>); <sup>13</sup>C NMR (75 MHz, CDCl<sub>3</sub>) δ 137.0, 136.5, 129.3, 128.8, 128.5, 127.6, 127.5, 126.7, 43.3.

**9**: Oil; <sup>1</sup>H NMR (300 MHz, CDCl<sub>3</sub>) δ 7.54-7.38 (m, 4 H, ArH), 7.30-7.08 (m, 6 H, ArH); <sup>13</sup>C NMR (75 MHz, CDCl<sub>3</sub>) δ 136.9, 129.0, 127.4, 127.0.

**10**: Oil; <sup>1</sup>H NMR (300 MHz, CDCl<sub>3</sub>) δ 7.46-7.15 (m, 10 H, ArH), 3.59 (s, 4 H, 2 × CH<sub>2</sub>); <sup>13</sup>C NMR (75 MHz, CDCl<sub>3</sub>) δ 137.3, 129.4, 128.4, 127.4, 43.2.

## References:

1. T. Tsuda, T. Kiyoi, T. Saegusa *J. Org. Chem.* 1990, **55**, 2554.
2. a) K. Kokubo, K. Matsumasa, M. Miura, M. Nomura *J. Org. Chem.* 1997, **62**, 4564.  
b) C.-H. Jun, H. Lee, J.-B. Hong, B.-I. Kwon *Angew. Chem., Int. Ed.* 2002, **41**, 2146.
3. V. M. Williams, J. C. Leung, R. L. Patman, M. J. Krische *Tetrahedron* 2009, **65**, 5024.
4. S. Hatanaka, Y. Obora, Y. Ishii *Chem. Eur. J.* 2010, **16**, 1883.
5. a) G. S. Viswanathan, C.-J. Li *Tetrahedron Lett.* 2002, **43**, 1613. b) A. Hayashi, M. Yamaguchi, M. Hirama *Synlett* 1995, 195. c) M. Curini, F. Epifano, F. Maltese; O. Rosati *Synlett* 2003, 552. d) M. F. A. Adamo, G. Bellini, S. Suresh *Tetrahedron* 2011, **67**, 5784.
6. A. El-Batta, C. Jiang, W. Zhao, R. Anness, A. L. Cooksy, M. Bergdahl *J. Org. Chem.* 2007, **72**, 5244.
7. a) B. E. Maryanoff, A. B. Reitz *Chem. Rev.* 1989, **89**, 863. b) G. Sabitha, P. Gopal, J. S. Yadav *Tetrahedron: Asymmetry* 2009, **20**, 2205.
8. Y. Sugawara, W. Yamada, S. Yoshida, T. Ikeno, T. Yamada *J. Am. Chem. Soc.* 2007, **129**, 12902.
9. a) M. Egi, Y. Yamaguchi, N. Fujiwara, S. Akai *Org. Lett.* 2008, **10**, 1867. b) M. N. Pennell, M. G. Unthank, P. Turner, T. D. Sheppard *J. Org. Chem.* 2011, **76**, 1479.
10. a) M. Picquet, C. Bruneau, P. H. Dixneuf *Chem. Commun.* 1997, 1201. b) V. Cadierno, S. E. García-Garrido, J. Gimeno *Adv. Synth. Catal.* 2006, **348**, 101.

11. a) C. P. Mehnert, N. C. Dispenziere, R. A. Cook *Chem. Commun.* 2002, 1610. b) J. Hamaya, T. Suzuki, T. Hoshi, K. Shimizu, Y. Kitayama, H. Hagiwara *Synlett* 2003, 873. c) F. Niu, L. Zhang, S.-Z. Luo, W.-G. Song *Chem. Commun.* 2010, **46**, 1109. d) S. Abelló, F. Medina, X. Rodríguez, Y. Cesteros, P. Salagre, J. E. Sueiras, D. Tichit, B. Coq *Chem. Commun.* 2004, 1096. e) A. Arnold, M. Markert, R. Mahrwald *Synthesis* 2006, **7**, 1099.
12. E. J. Corey, H. A. Kirst, John A. Katzenellenbogen *J. Am. Chem. Soc.* 1970, **92**, 6314.
13. a) J.-S. Zheng, H.-N. Chang, F.-L. Wang, L. Liu *J. Am. Chem. Soc.* 2011, **133**, 11080. b) K. Ohmori, T. Suzuki, K. Taya, D. Tanabe, T. Ohta, K. Suzuki *Org. Lett.* 2001, **3**, 1057. c) B. D. Jones, J. J. La Clair, C. E. Moore, A. L. Rheingold, M. D. Burkart *Org. Lett.* 2010, **12**, 4516. d) S. Tamura, S. Doke, N. Murakami *Tetrahedron* 2010, **66**, 8476.
14. H. Li, C. Morin *Tetrahedron Lett.* 2004, **45**, 5673.
15. a) P. Gamez, C. Ariento, J. Goré, B. Cazes *Tetrahedron* 1998, **54**, 14825. b) H. E. Ensley, R. R. Buescher, K. Lee *J. Org. Chem.* 1982, **47**, 404. c) G. A. Tolstikov, M. S. Miftakhov, N. A. Danilova, Y. L. Velder *Synthesis* 1986, 496. d) W. Adam, P. Klug *Synthesis* 1994, 567. e) E. Piers, P. D. Coish *Synthesis* 1995, 47.
16. a) G. Pattenden, G. Rescourio *Org. Biomol. Chem.*, 2008, **6**, 3428. b) R. S. Coleman, M. C. Walczak, E. L. Campbell *J. Am. Chem. Soc.* 2005, **127**, 16038. c) A. Pollex, M. Hiersemann *Org. Lett.* 2005, **7**, 5705. d) N. A. Morra, B. L. Pagenkopf *Org. Lett.* 2011, **13**, 572. e) D. Oehlich, S. M. E. Vidot, M. Davies, G. J.

- Clarkson, M. Shipman *Tetrahedron* 2007, **63**, 4703.
17. a) L. Commeiras, M. Santelli, J.-L. Parrain *Tetrahedron Lett.* 2003, **44**, 2311. b) S. Tamura, M. Tonokawa, N. Murakami *Tetrahedron Lett.* 2010, **51**, 3134.
18. D. Zhang, J. M. Ready *J. Am. Chem. Soc.* 2007, **129**, 12088.
19. a) F.-L. Qing, W.-Z. Gao, J. Ying *J. Org. Chem.* 2000, **65**, 2003. b) T. Yamazaki, T. Yamamoto, R. Ichihara *J. Org. Chem.* 2006, **71**, 6251.
20. R. Jiménez, L. A. Maldonado, H. Salgado-Zamora *Nat. Prod. Res.* 2010, **24**, 1274.
21. a) M. Slodowicz, S. Barata-Vallejo, A. Vázquez, N. S. Nudelman, A. Postigo *J. Fluorine Chem.* 2012, **135**, 137. b) J. F. Chesa, D. Velasco, F. López-Calahorra *Synth. Commun.* 2010, **40**, 1822. c) X.-Q. Tang, C.-M. Hu *J. Chem. Soc., Chem. Commun.* 1994, 631. d) H.-P. Guan, X.-Q. Tang, B.-H. Luo, C.-M. Hu *Synthesis* 1997, 1489.
22. a) X. Fang, X. Yang, X. Yang, S. Mao, Z. Wang, G. Chen, F. Wu *Tetrahedron* 2007, **63**, 10684. b) Z.-Y. Long, Q.-Y. Chen *Tetrahedron Lett.* 1998, **39**, 8487. c) A.-R. Li, Q.-Y. Chen *Synthesis* 1997, 333.
23. Y. Li, H. Li, J. Hu *Tetrahedron* 2009, **65**, 478.
24. a) S. Ma, Z. Lu *Adv. Synth. Catal.* 2006, **348**, 1894. b) Z. Lu, S. Ma *J. Org. Chem.* 2006, **71**, 2655.
25. a) S. Ma, *Acc. Chem. Res.* 2009, **42**, 1679. b) J. Luis G. Ruano, V. Marcos, J. Alemén *Angew. Chem. Int. Ed.* 2009, **48**, 3155. c) R. W. Friesen, C. Vanderwal *J. Org. Chem.* 1996, **61**, 9103.

26. a) J. Yang, S. K. Rallapalli, J. M. Cook *Tetrahedron Lett.* 2010, **51**, 815. b) W. R. Bowman, C. F. Bridge, P. Brookes, M. O. Cloonan, D. C. Leach *J. Chem. Soc., Perkin Trans. 1*, 2002, 58. c) W. Yin, M. S. Kabir, Z. Wang, S. K. Rallapalli, J. Ma, J. M. Cook *J. Org. Chem.* 2010, **75**, 3339.
27. D. Zhang, C. Yuan *Eur. J. Org. Chem.* 2007, 3916.
28. Ma, S.; Ren, H.; Wei, Q. *J. Am. Chem. Soc.* 2003, **125**, 4817.
29. Zhou, C.; Fang, Z.; Fu, C.; Ma, S. *J. Org. Chem.* 2009, **74**, 2887.
30. Wang, M.; Fu, C.; Ma, S. *Adv. Synth. Catal.* 2011, **353**, 1775.
31. Mukai, C.; Kobayashi, M.; Kubota, S.; Takahashi, Y.; Kitagaki, S. *J. Org. Chem.* 2004, **69**, 2128.
32. Antonioletti, R.; D'Auria, M.; Piancatelli, G.; Scettri, A. *Tetrahedron Lett.* 1981, **22**, 1041.
33. Prabhu, R. K.; Sivanand, S.; Chandrasekaran, S. *Angew. Chem. Int. Ed.* 2000, **39**, 4316.

# $^1\text{H}/^{13}\text{C}$ NMR Spectra of These Compounds

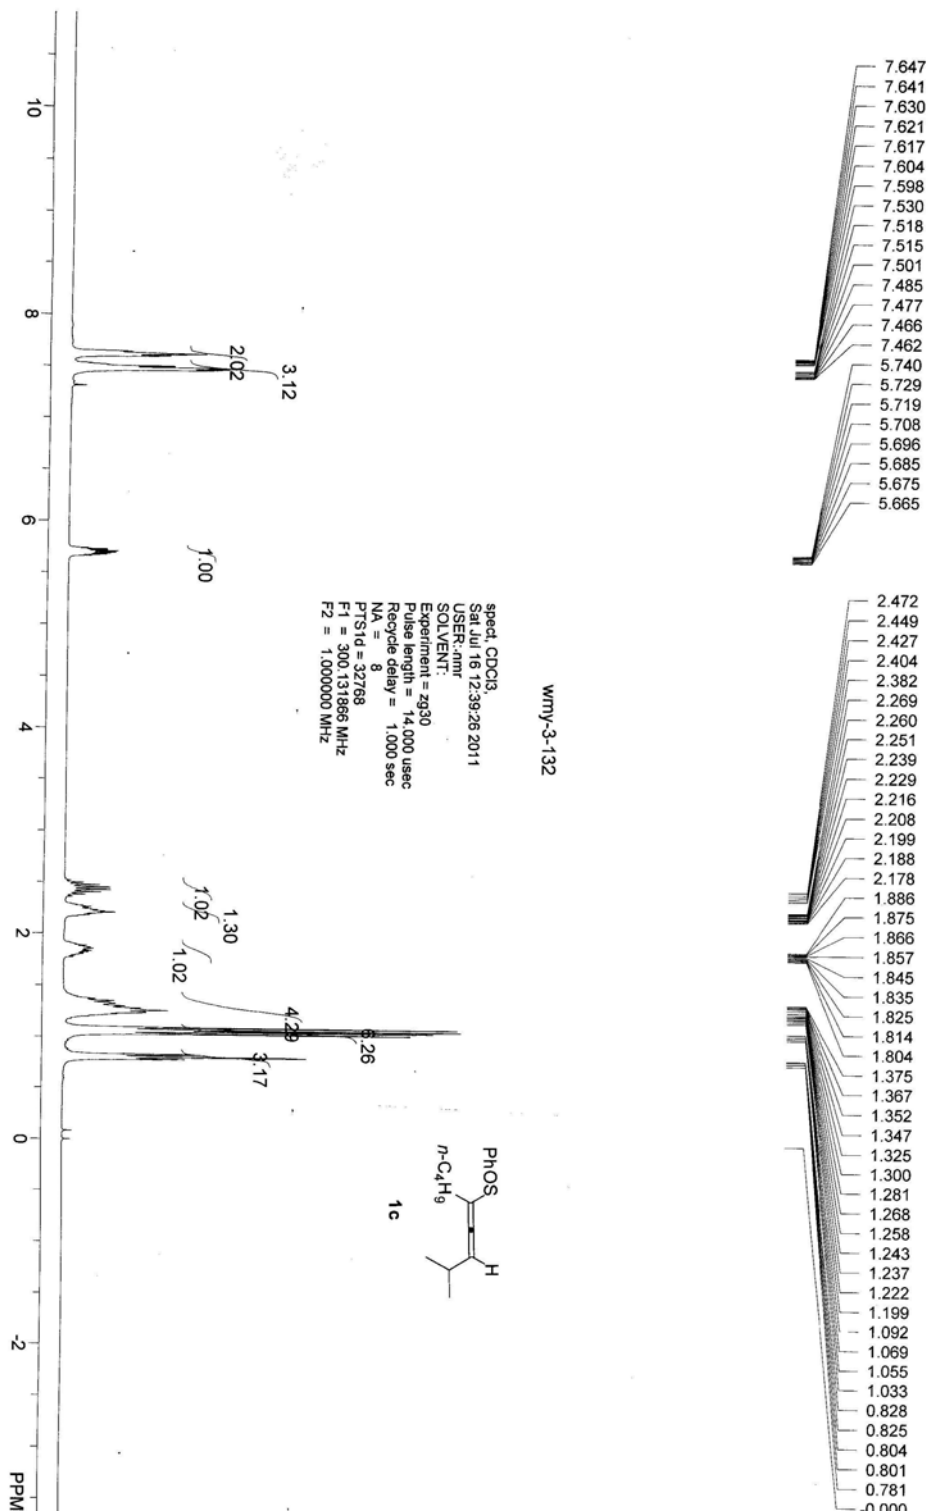

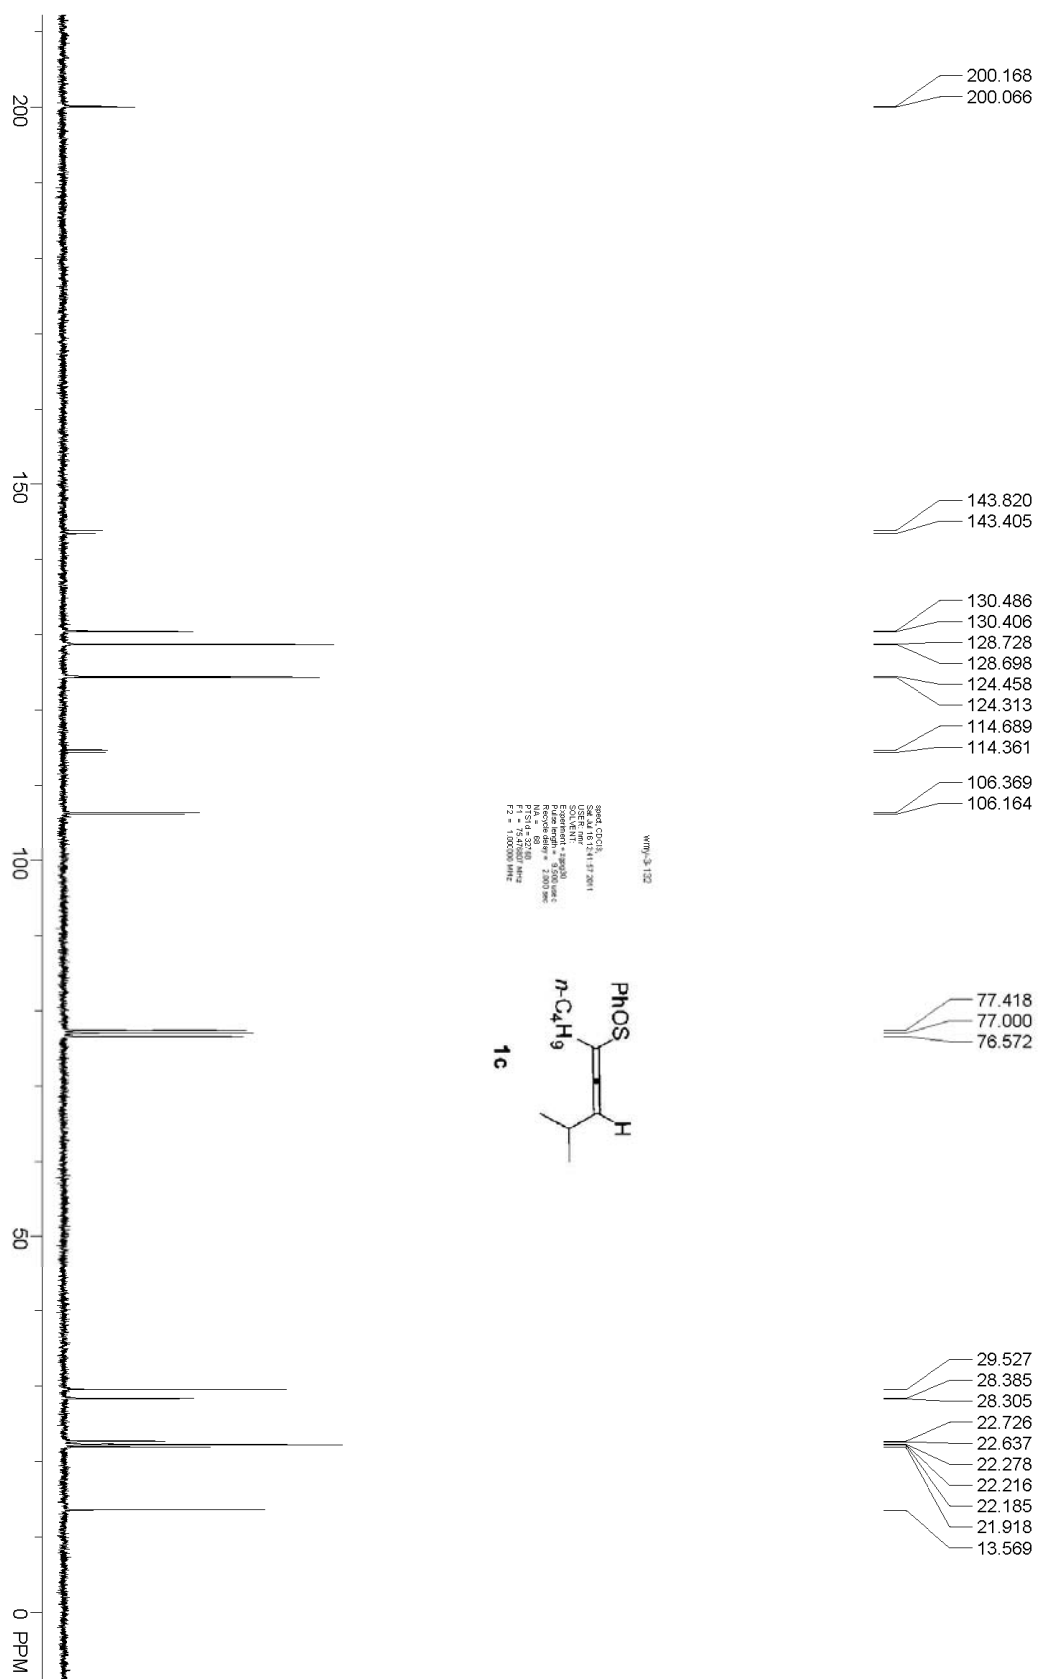



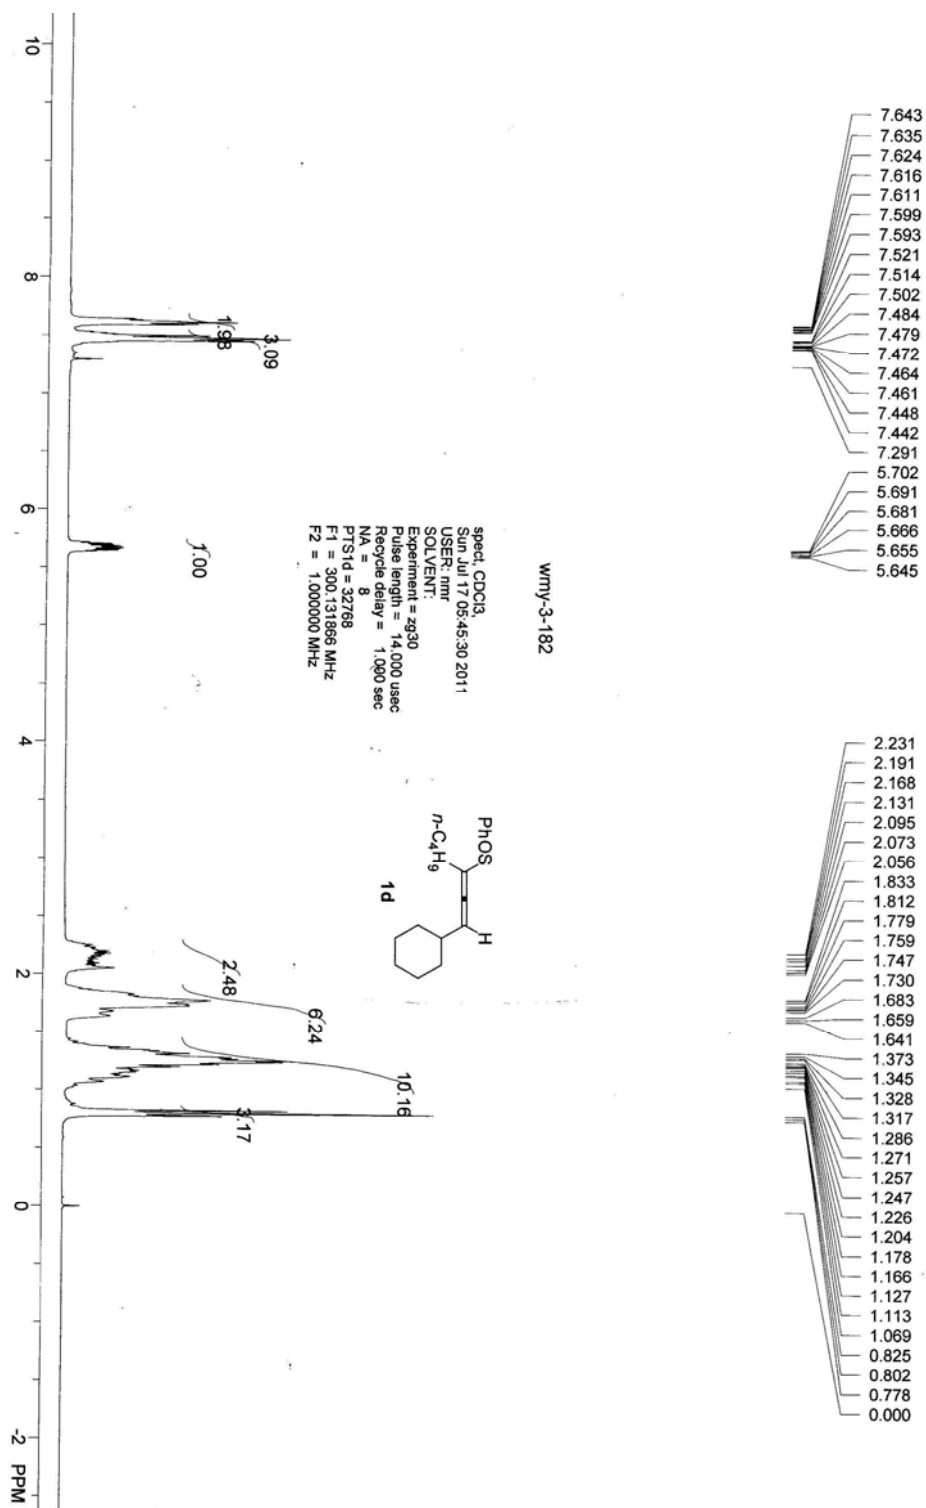

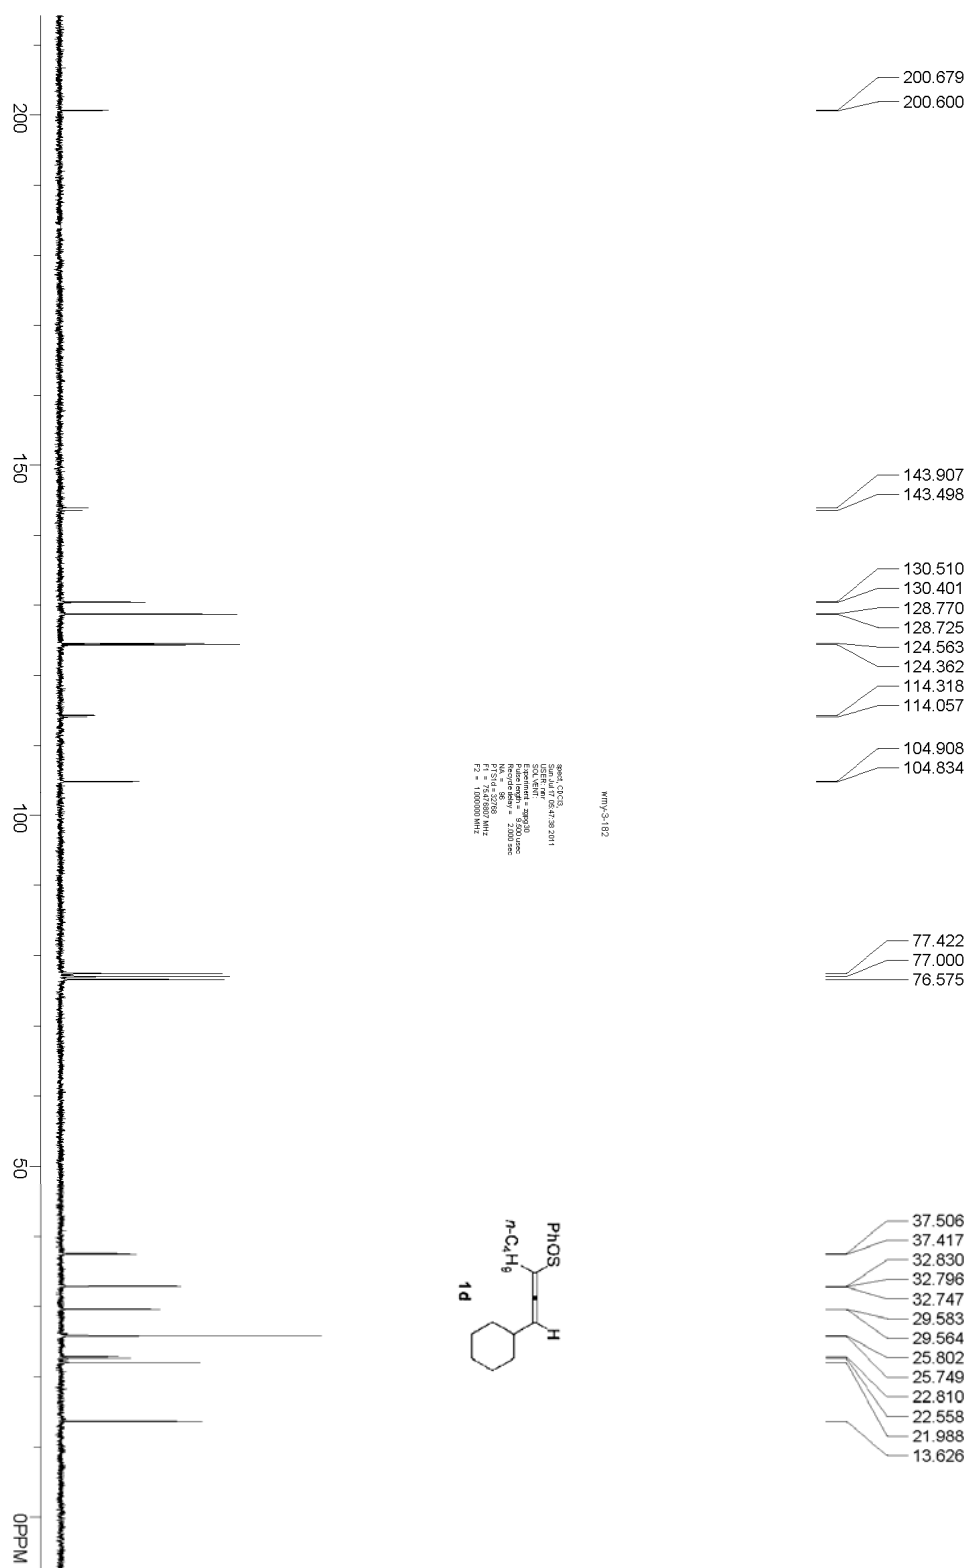

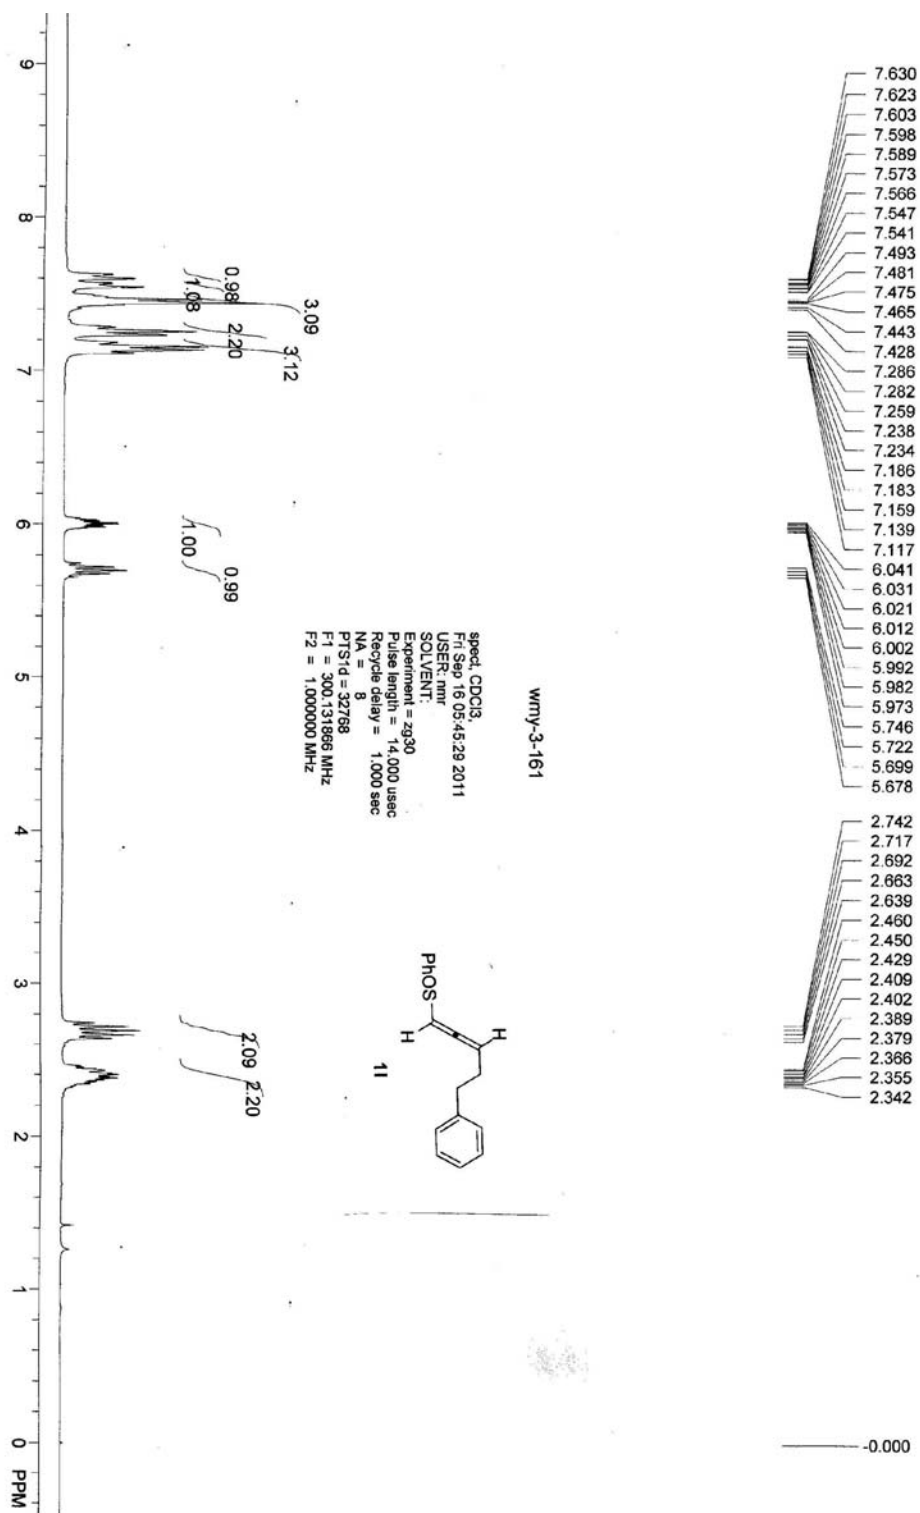

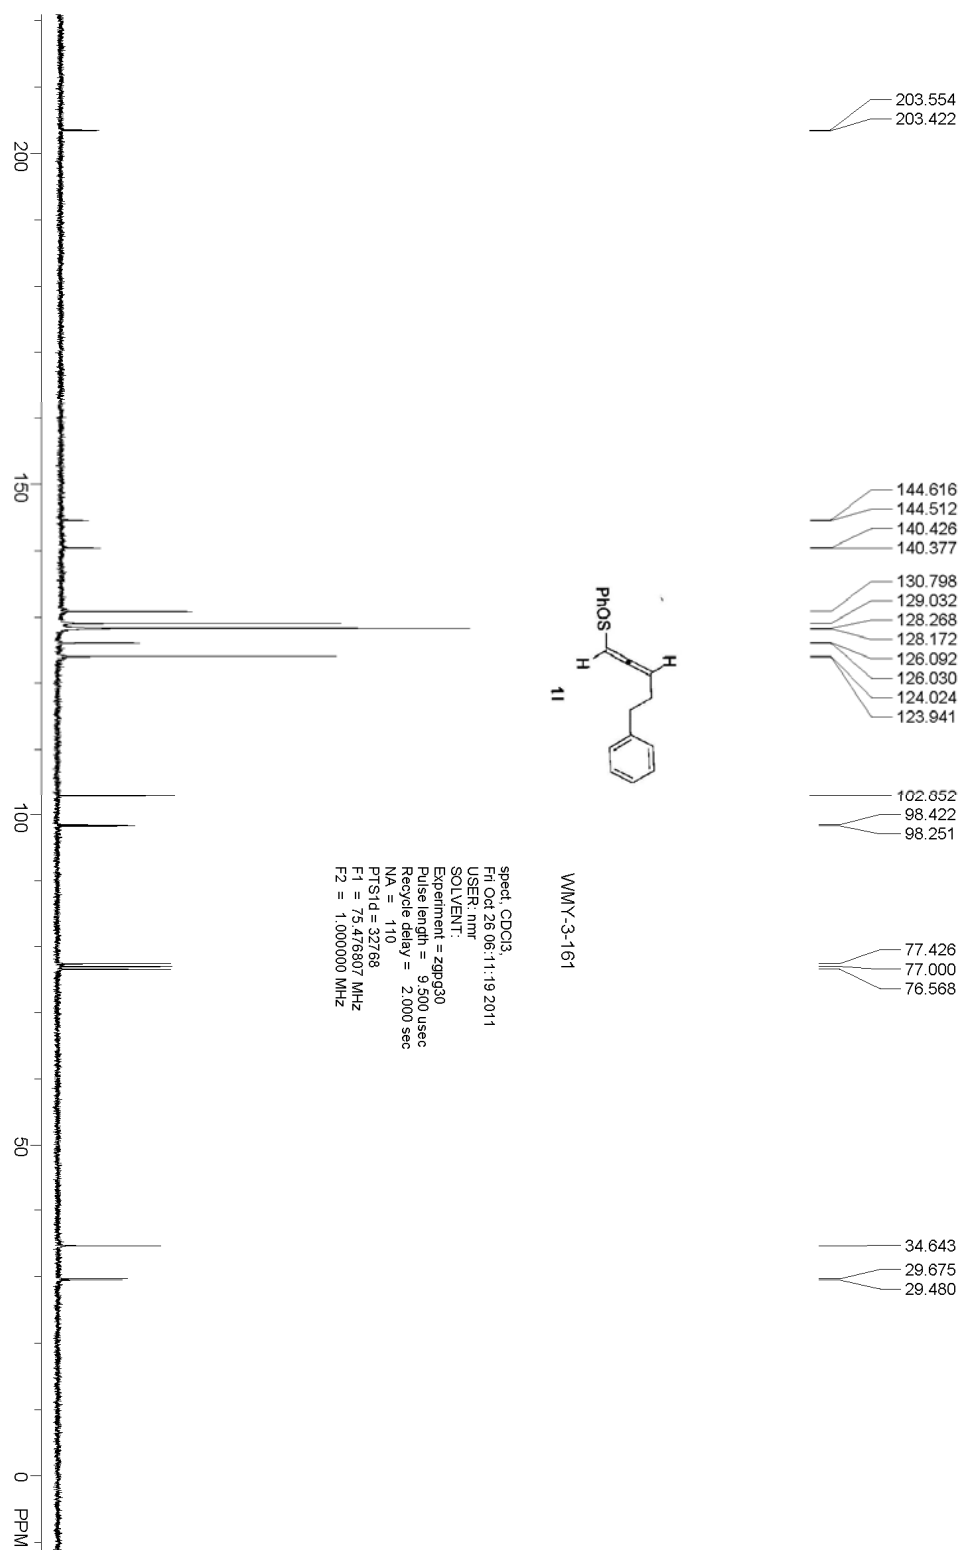

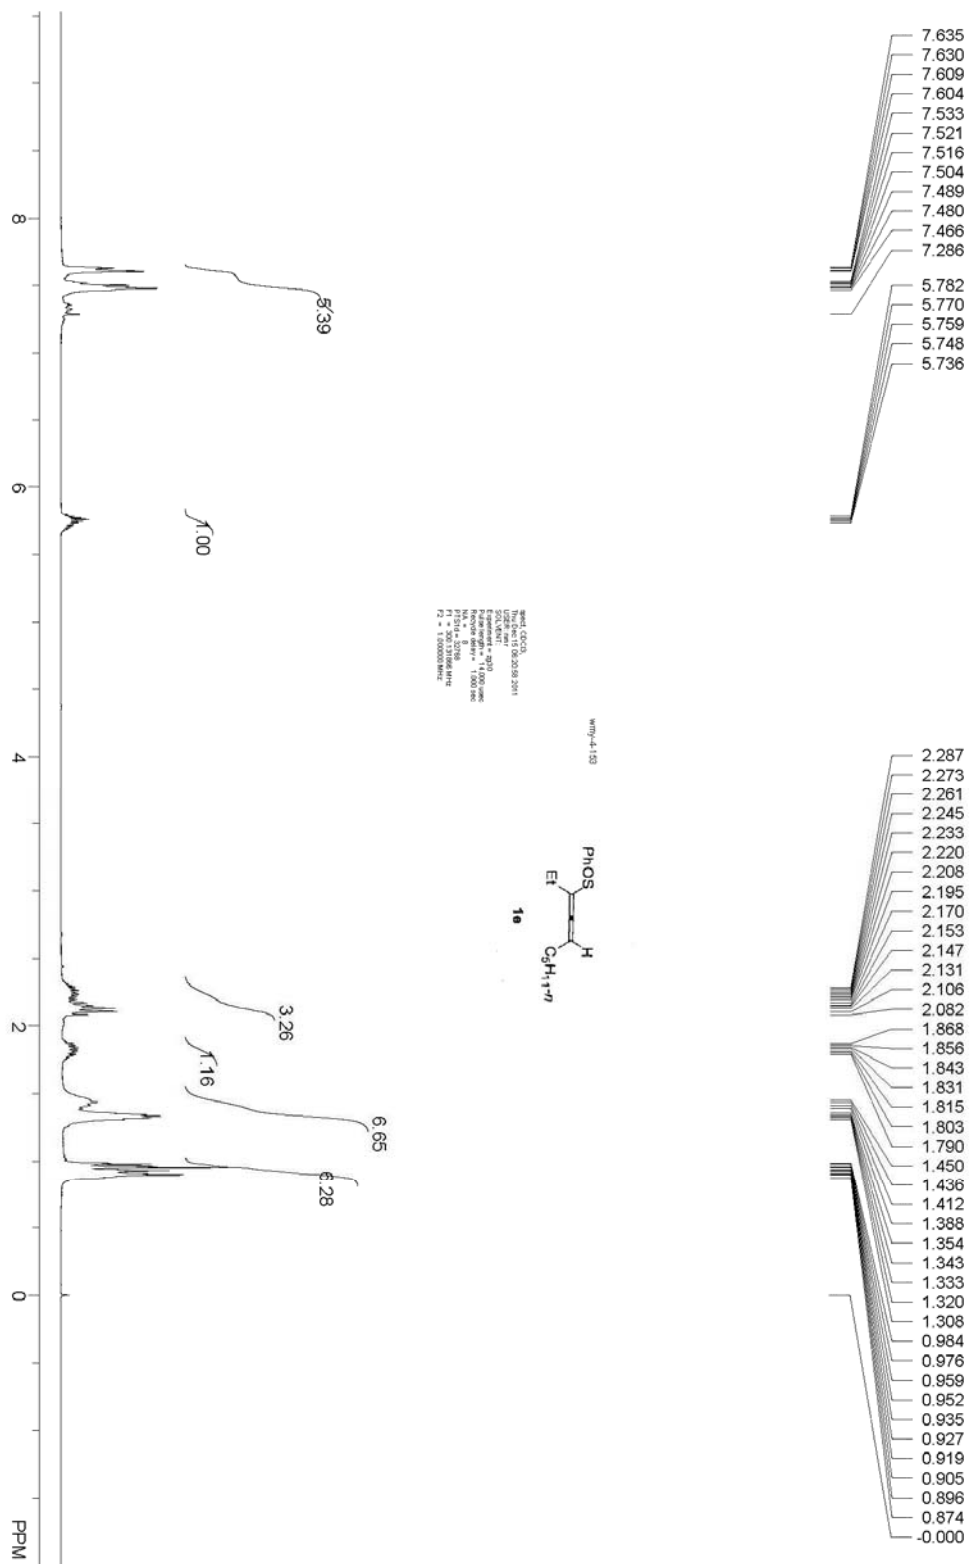

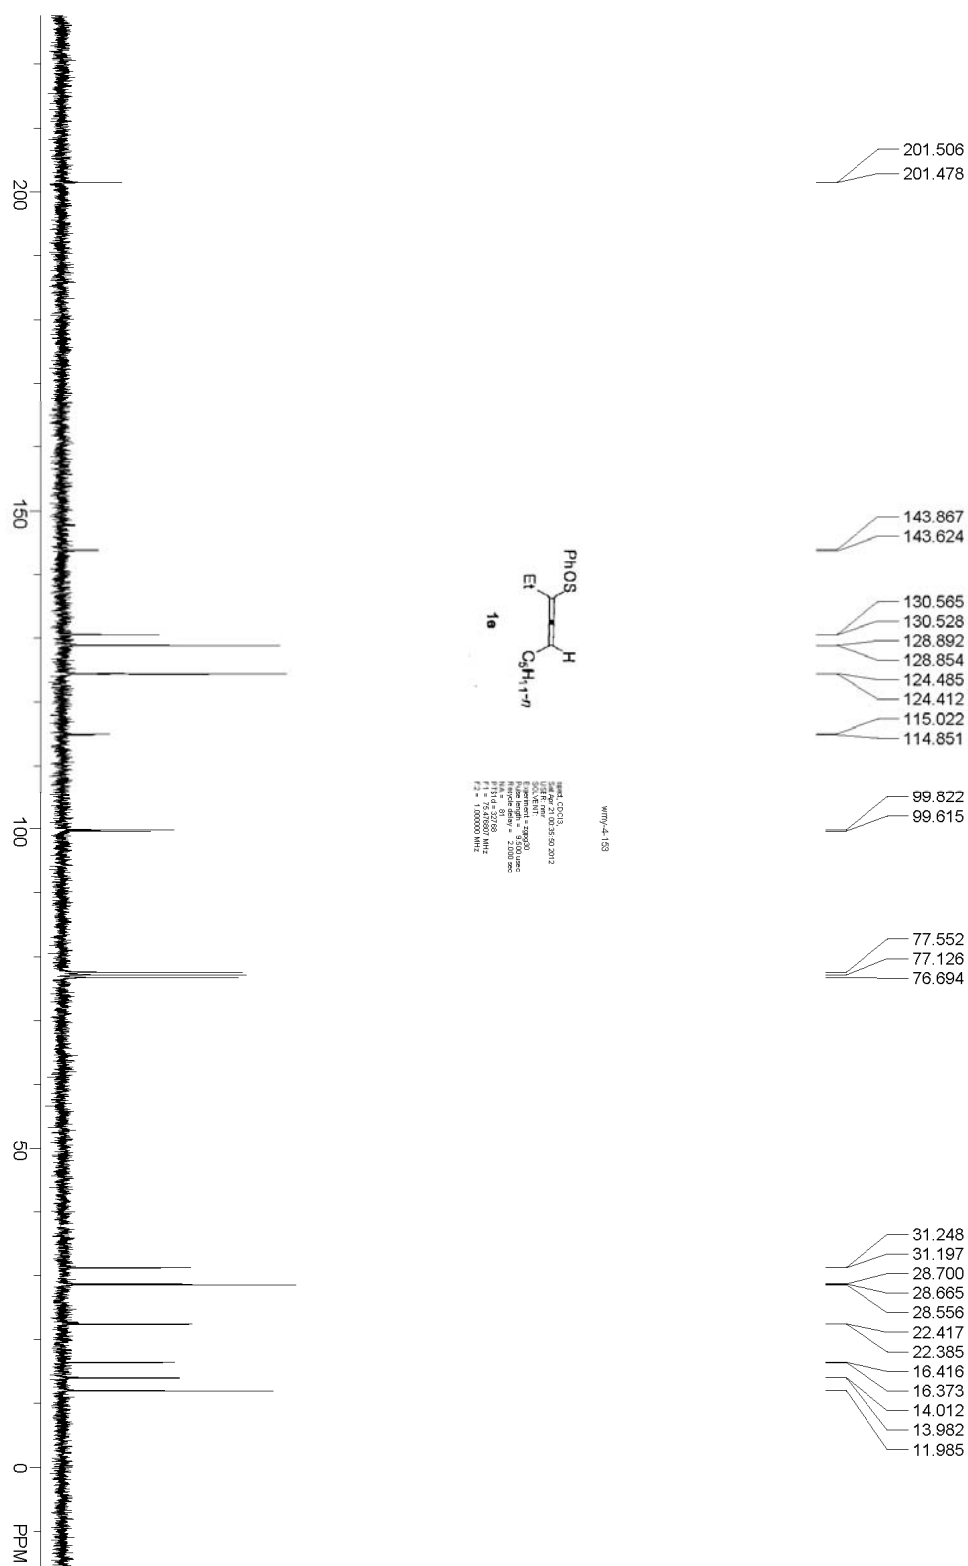

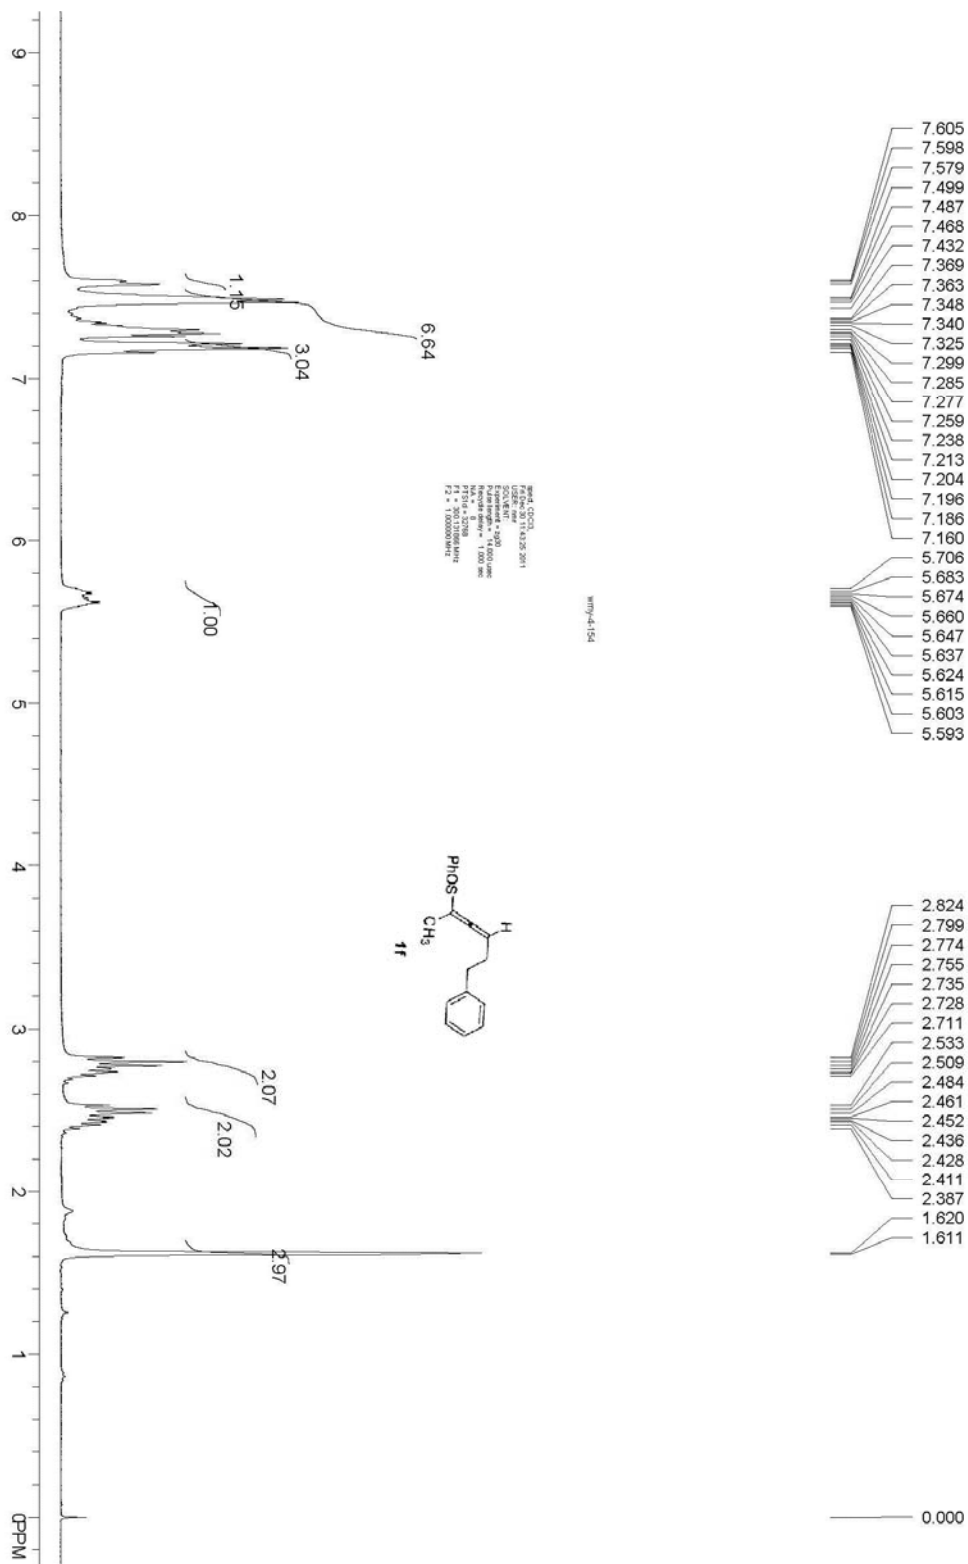

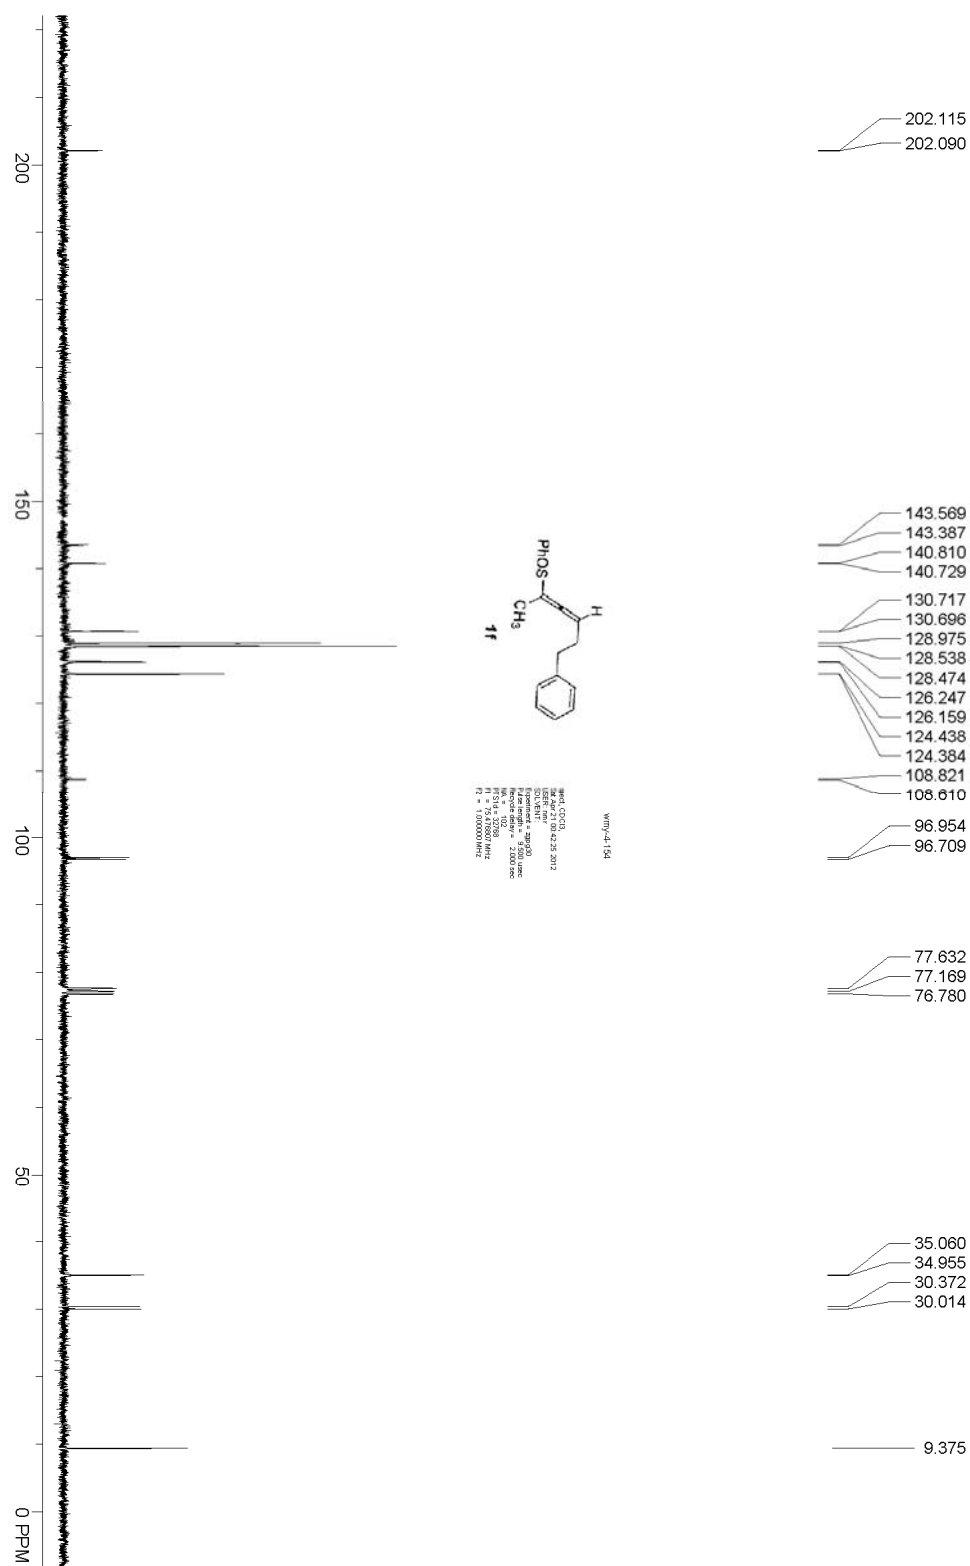



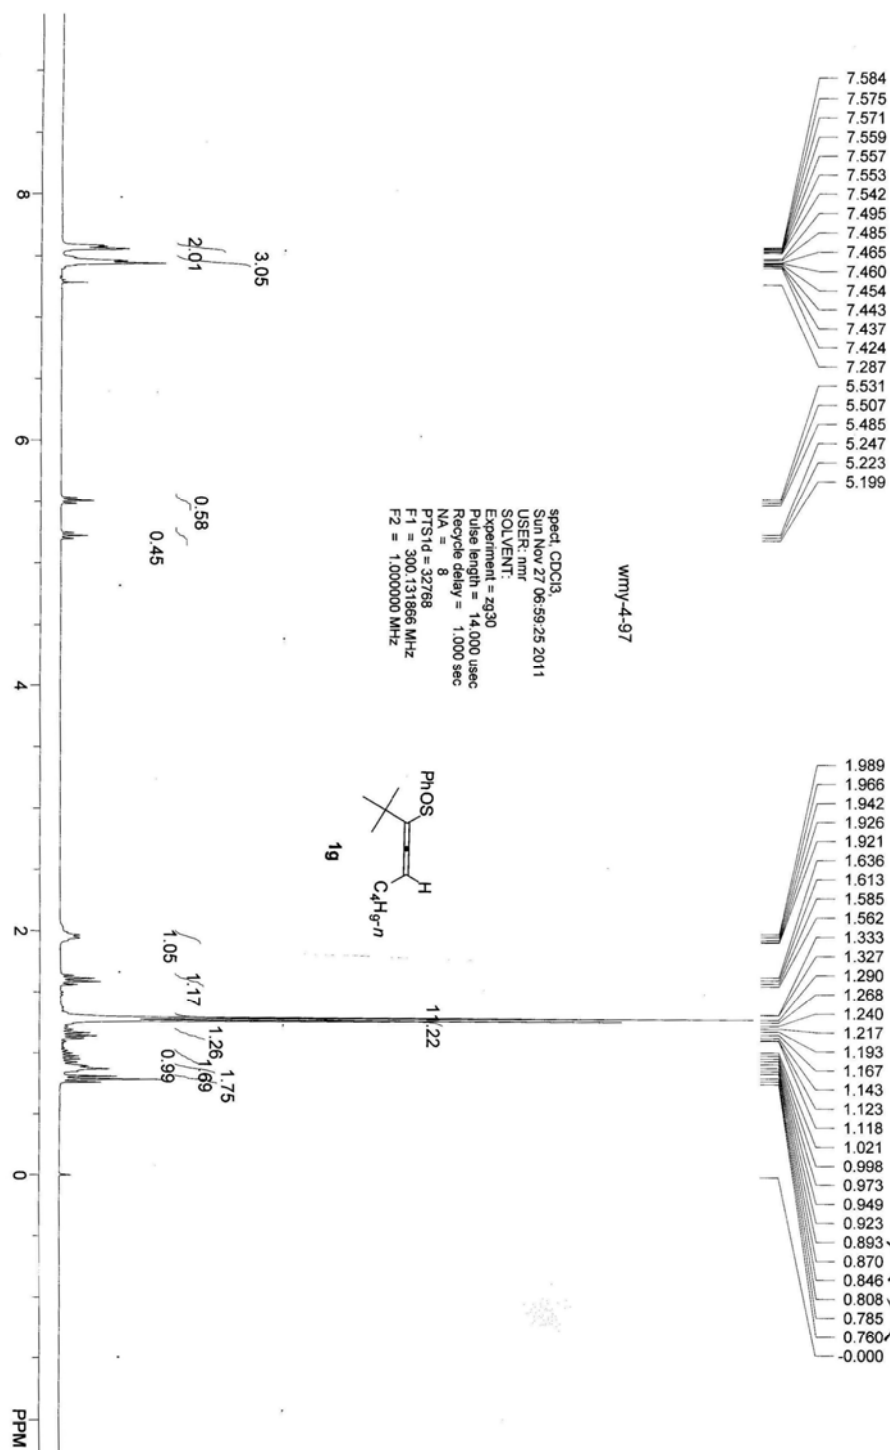

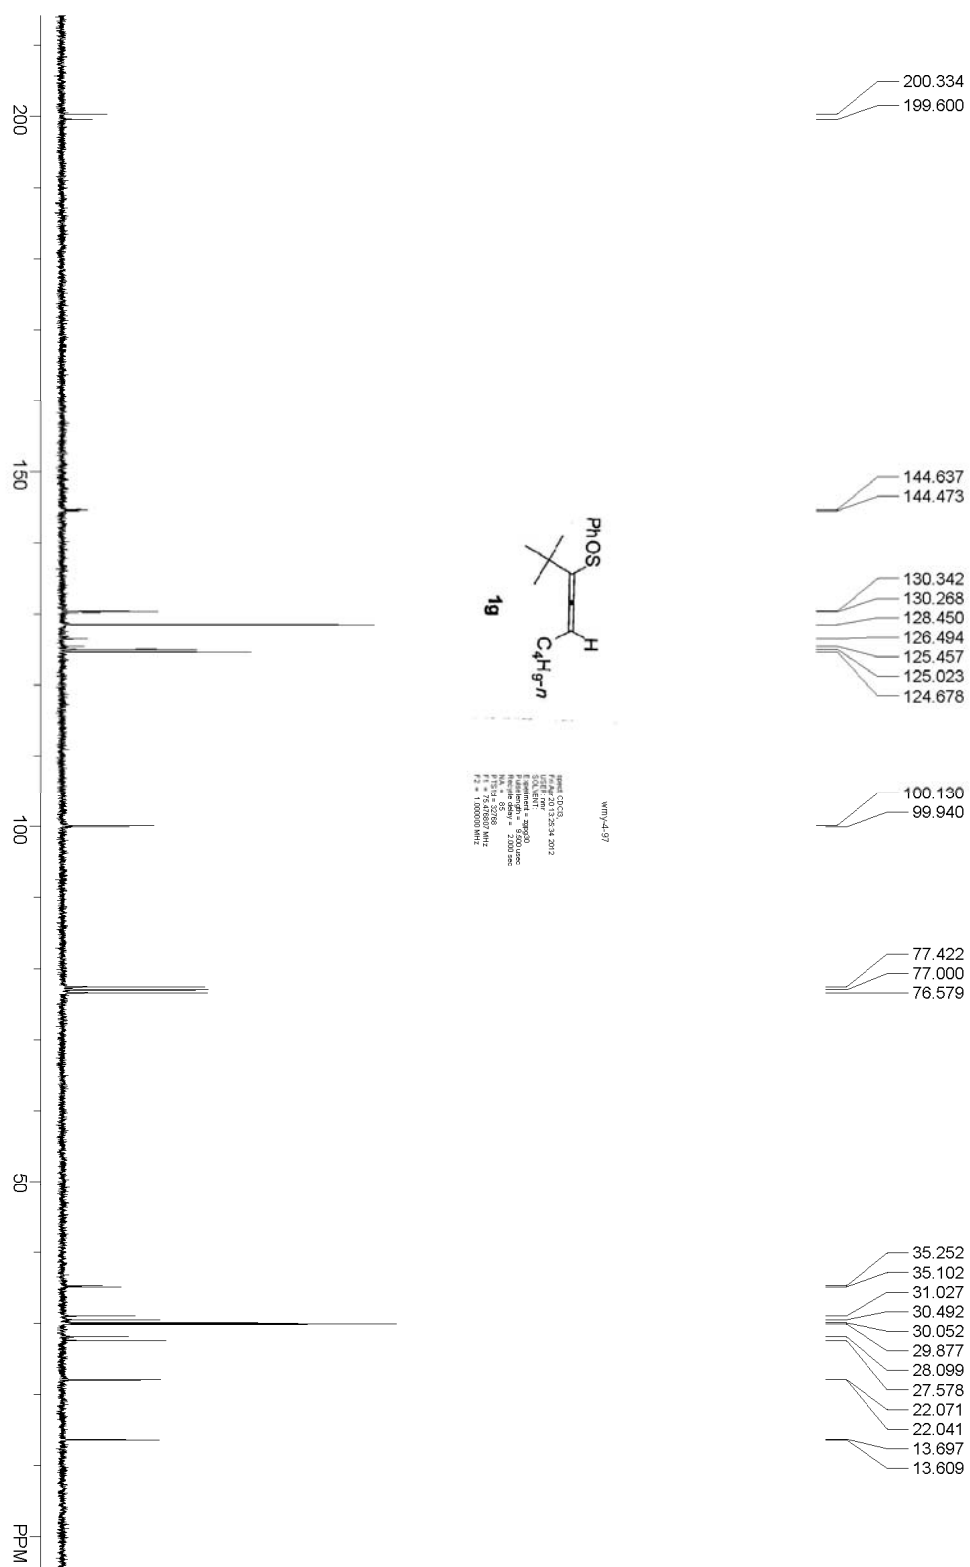

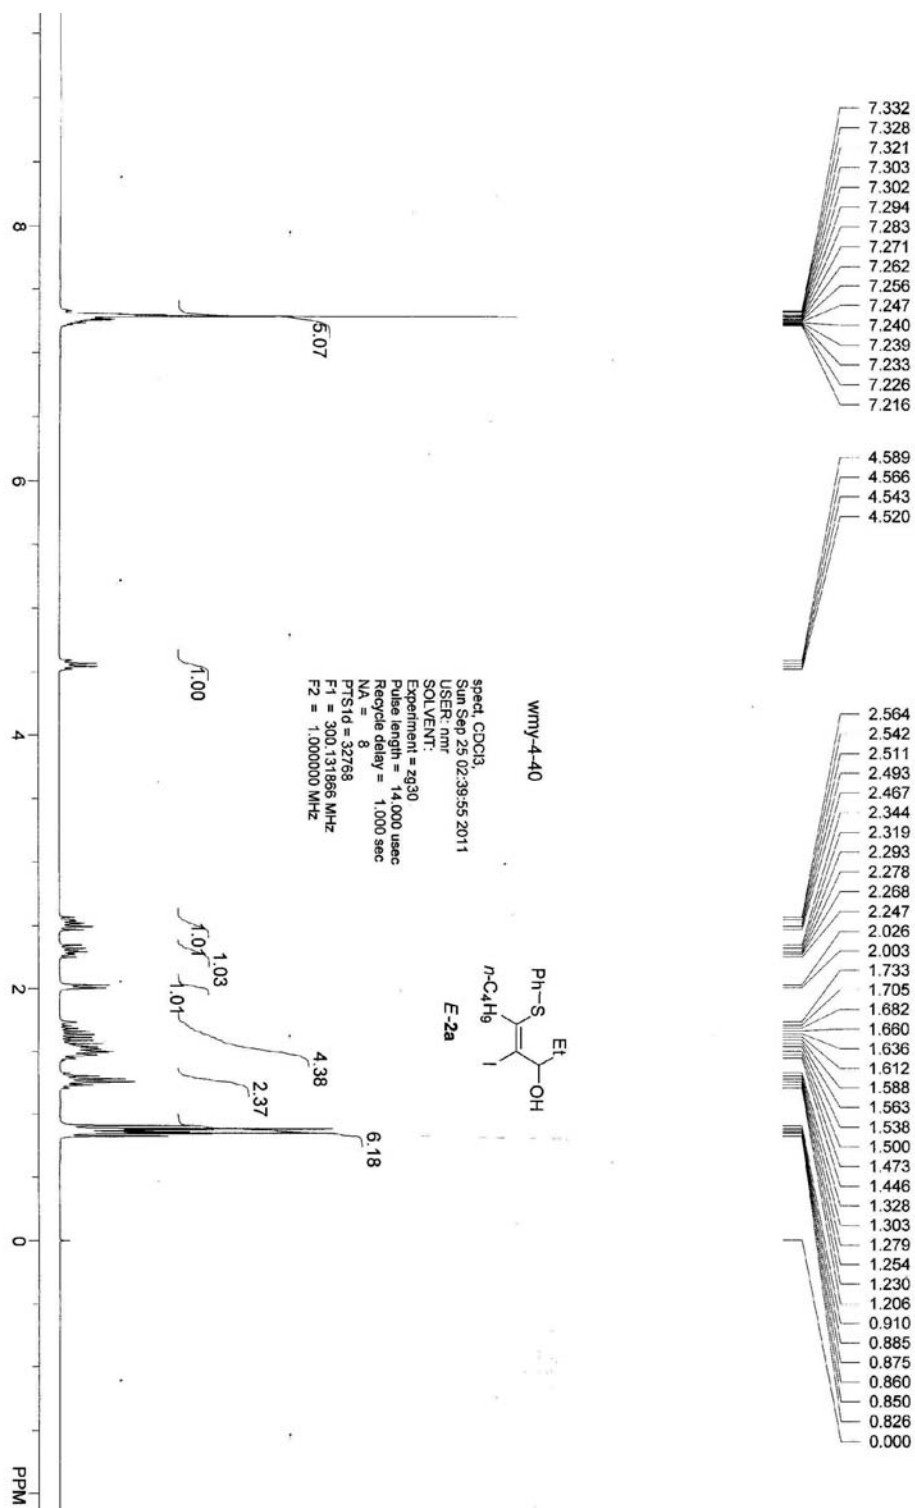

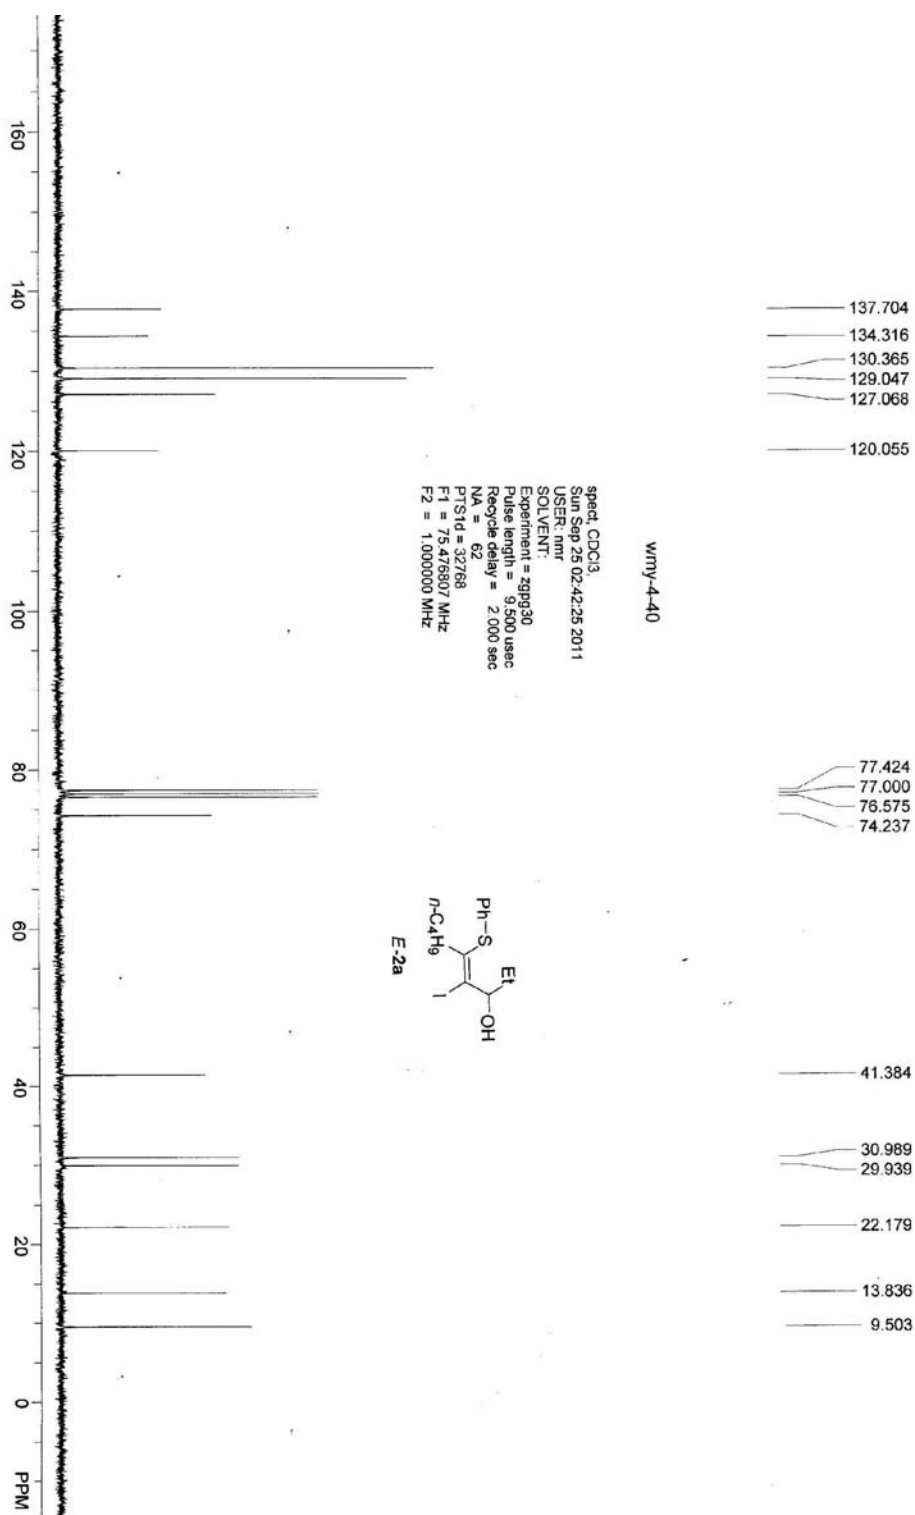

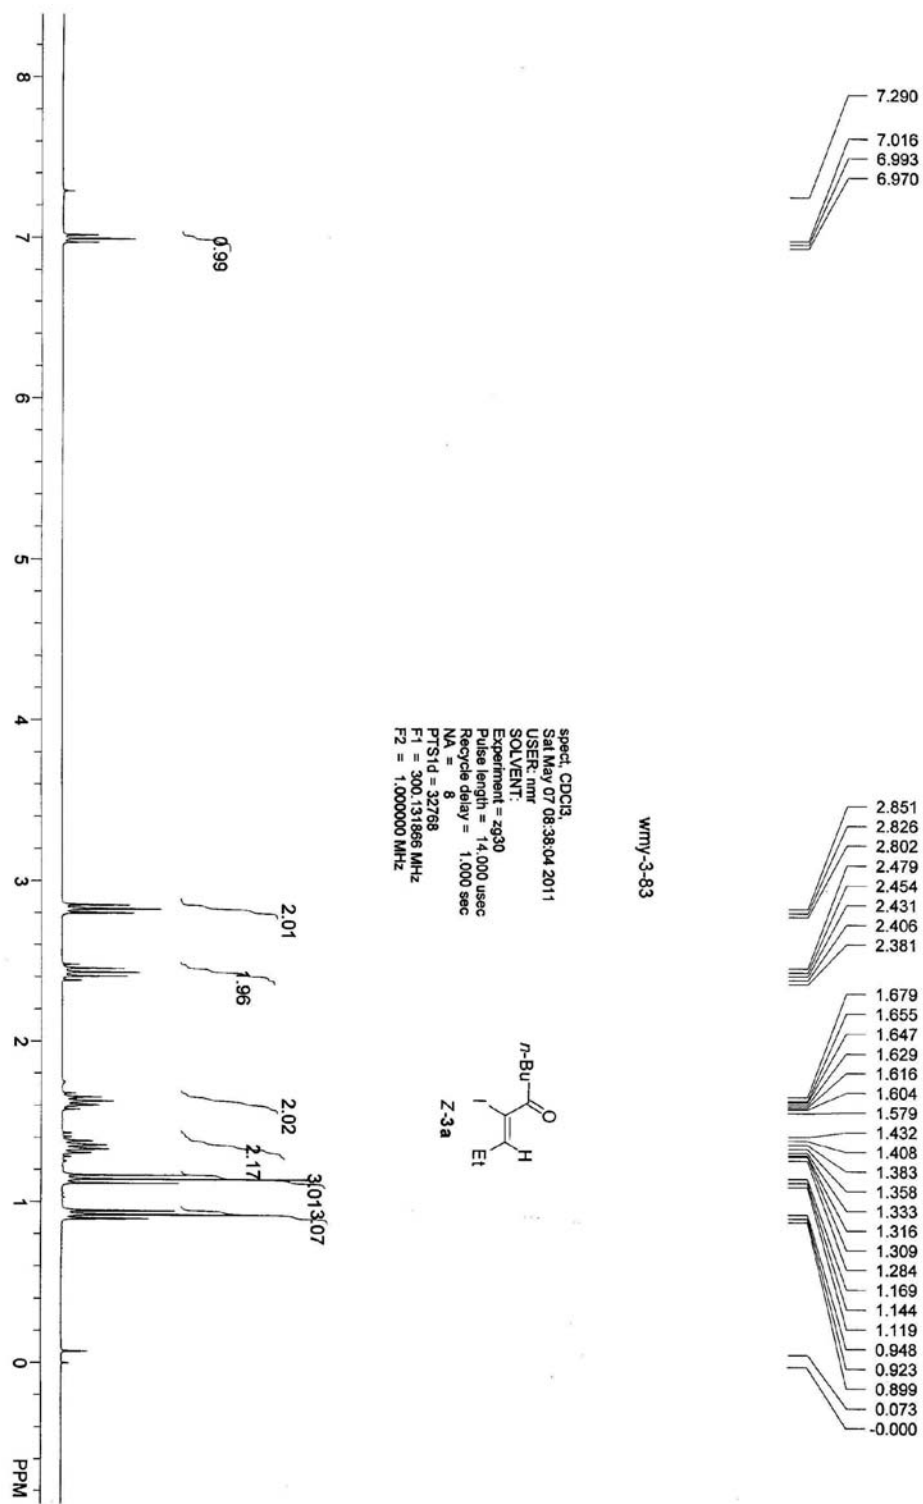

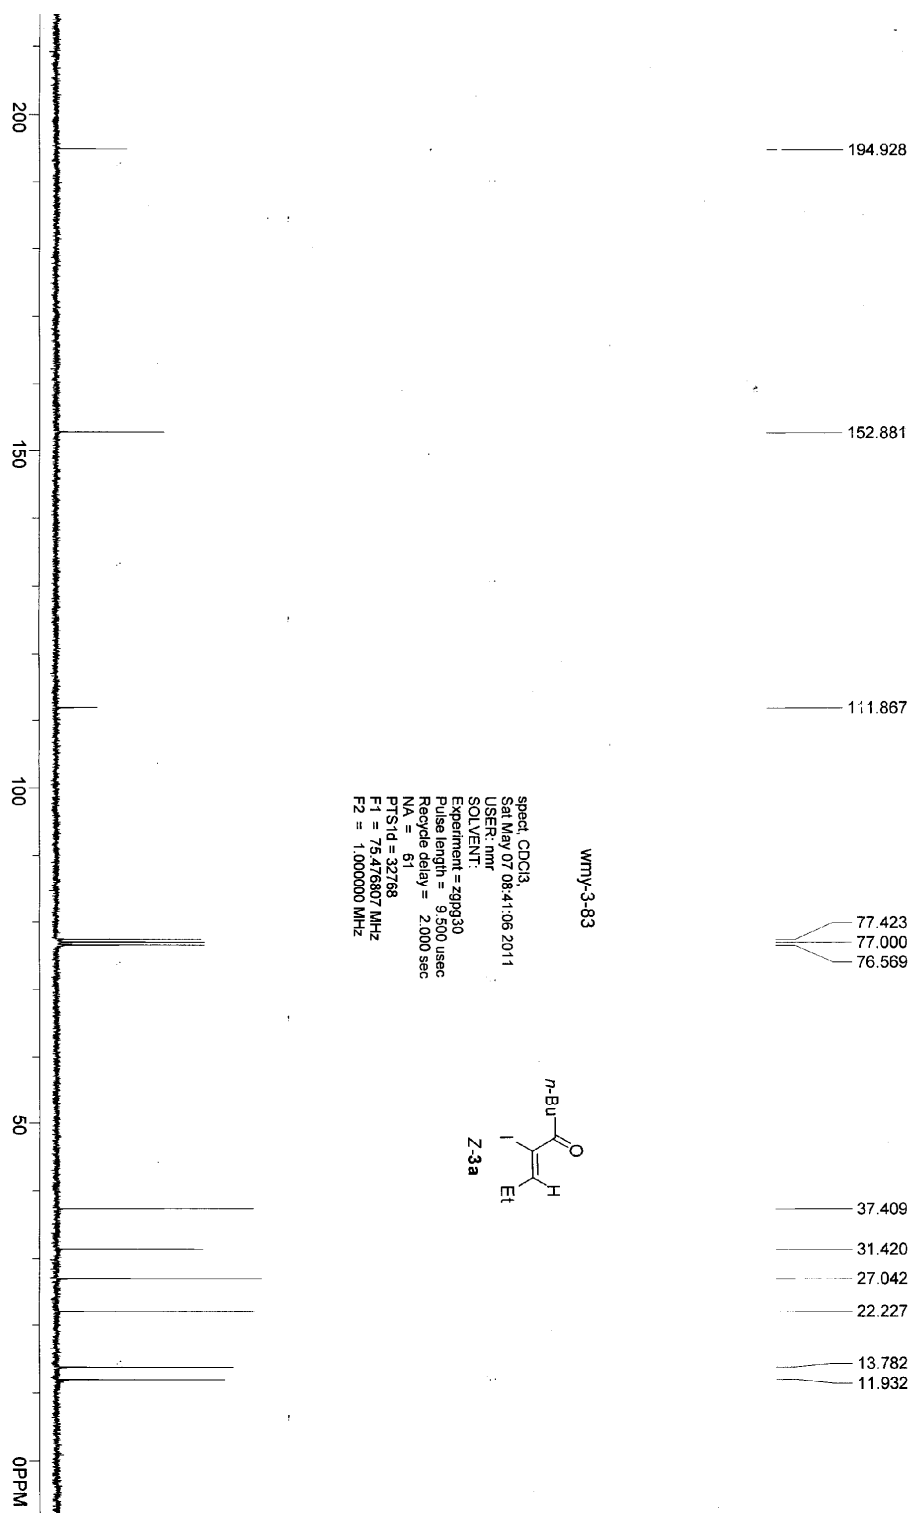

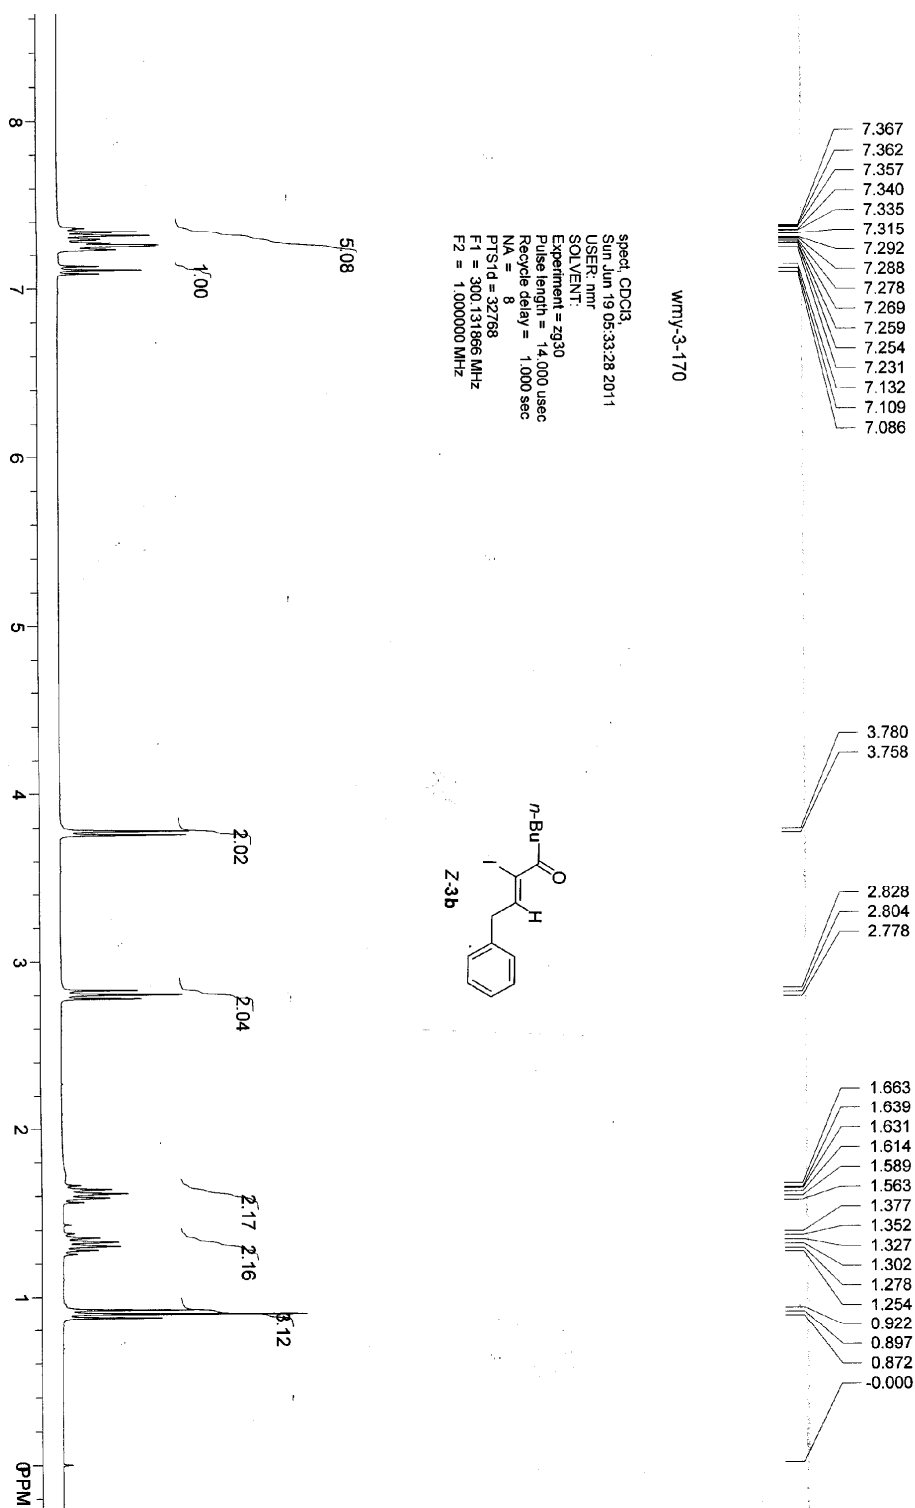

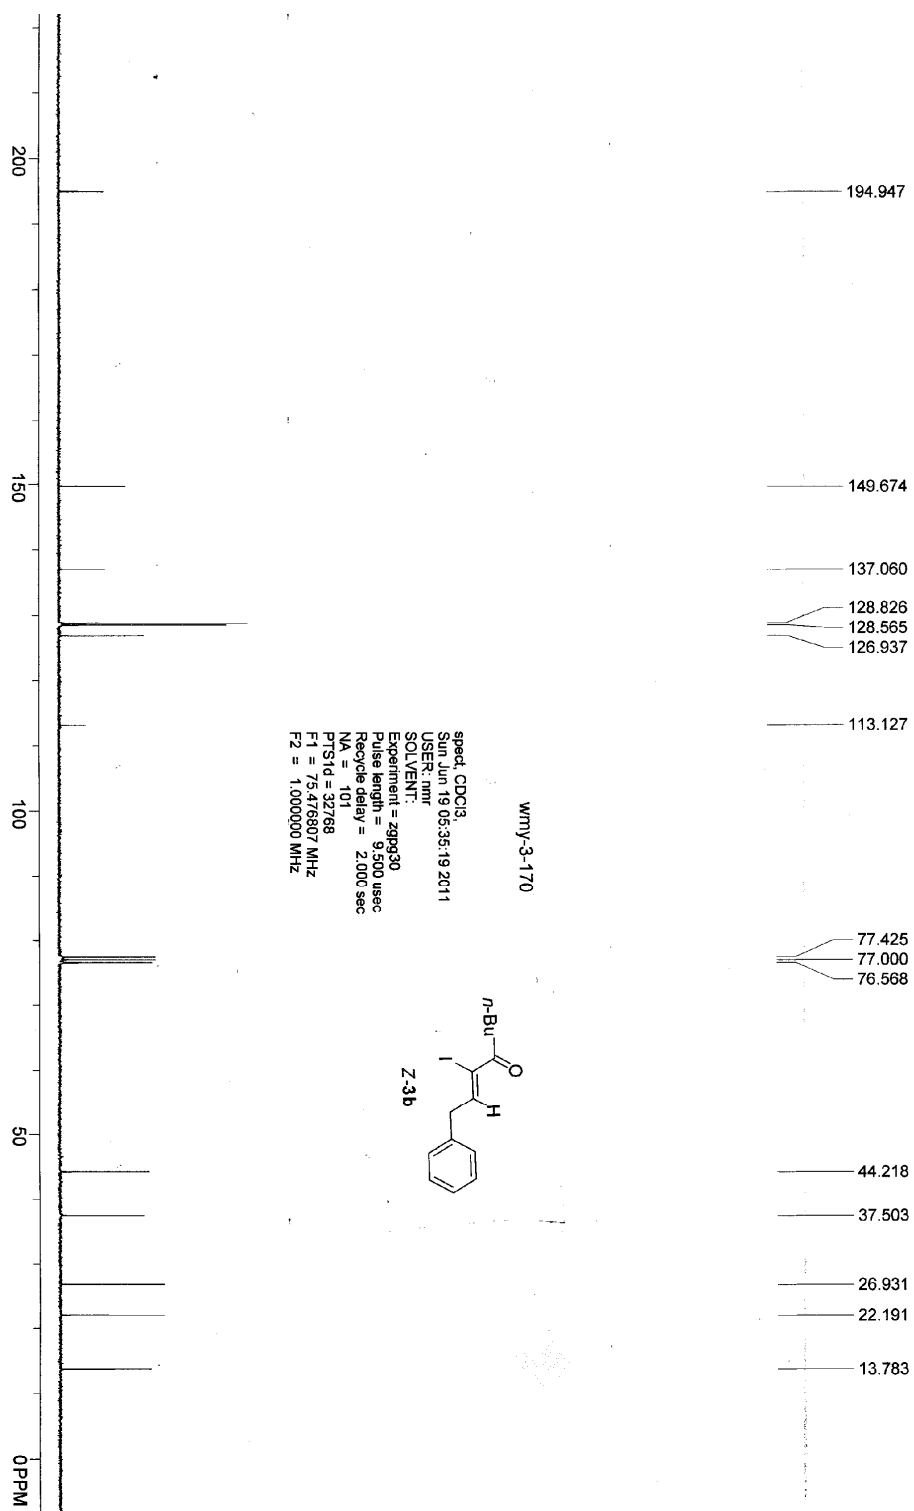



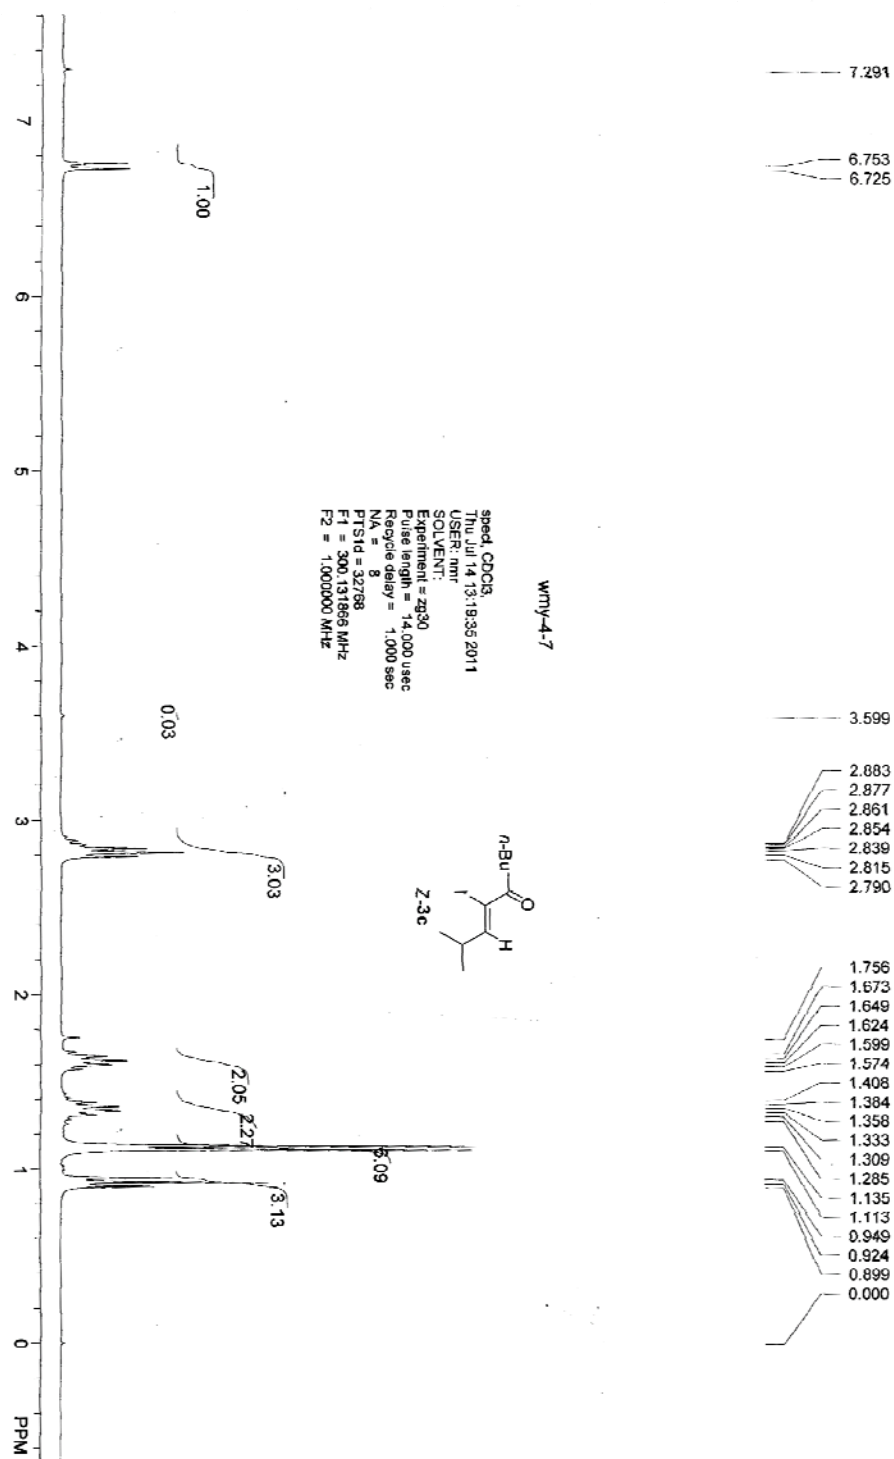

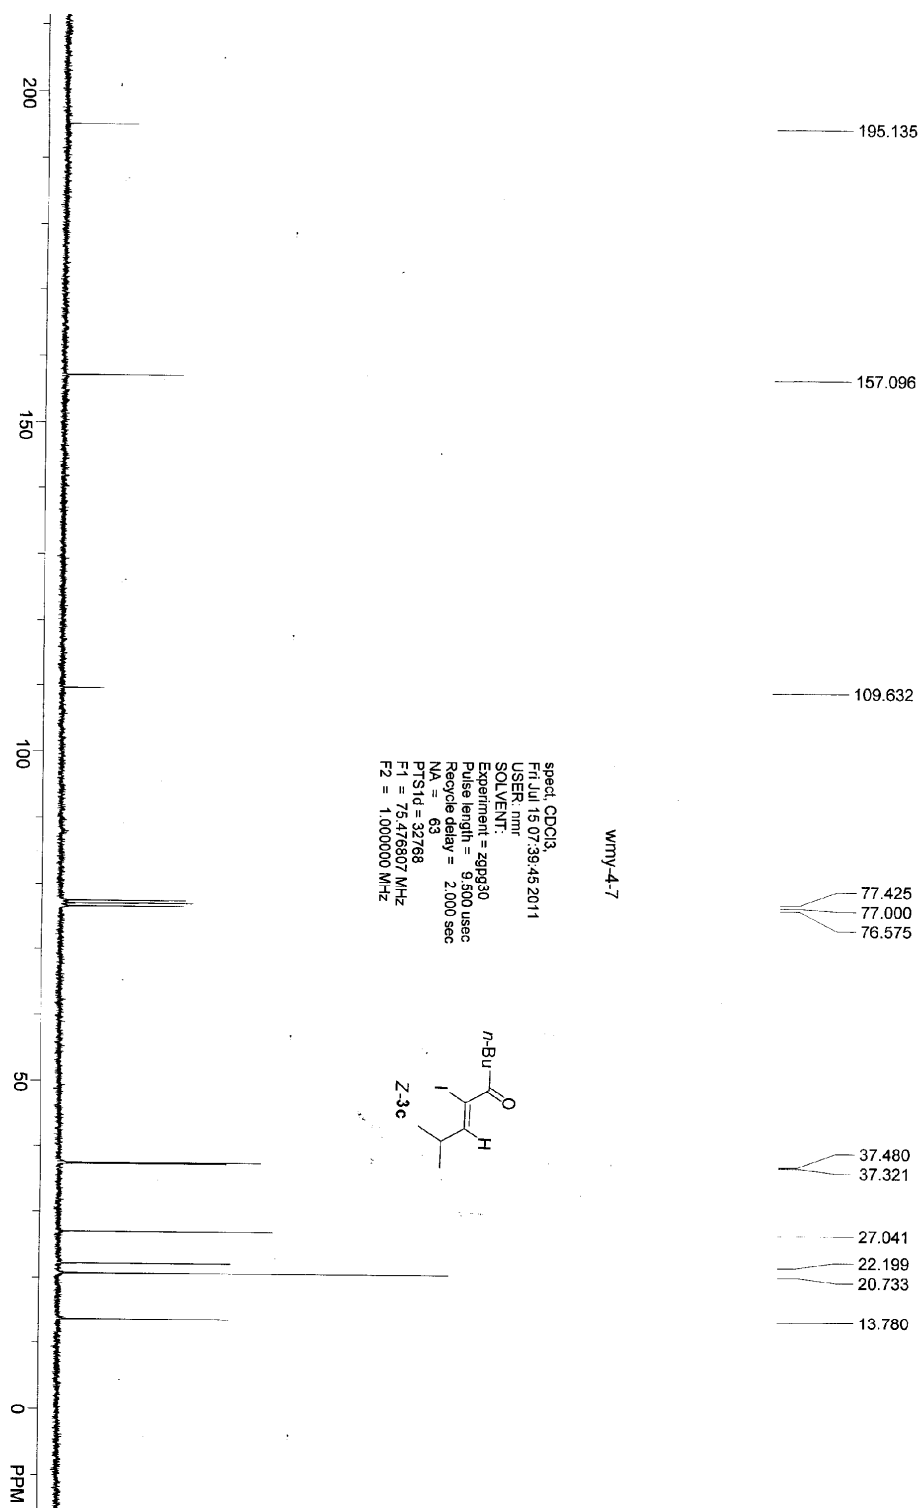

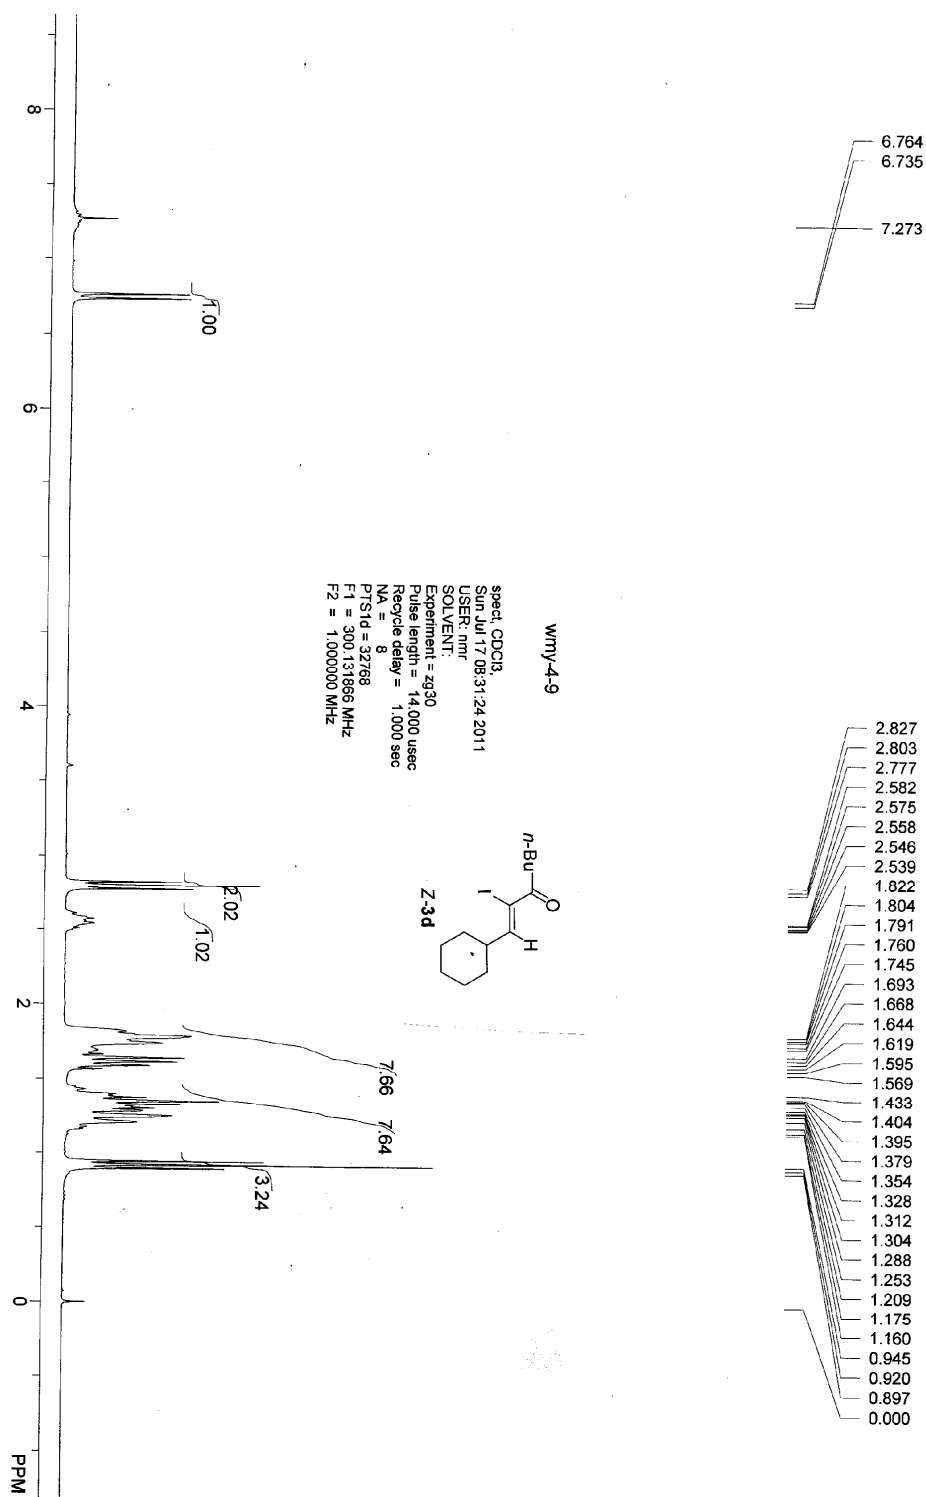

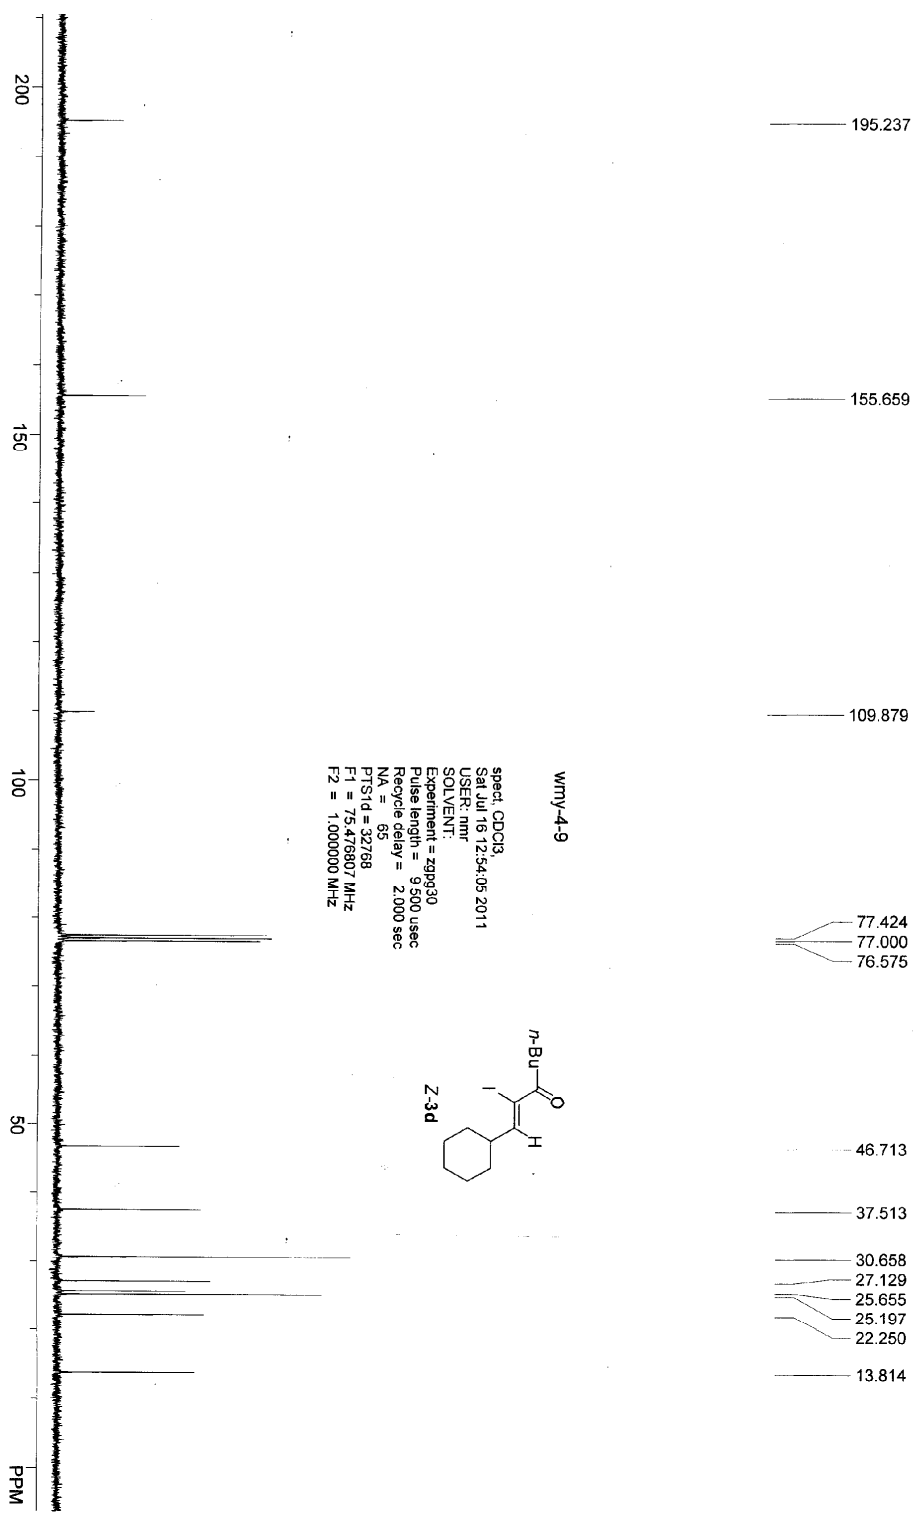

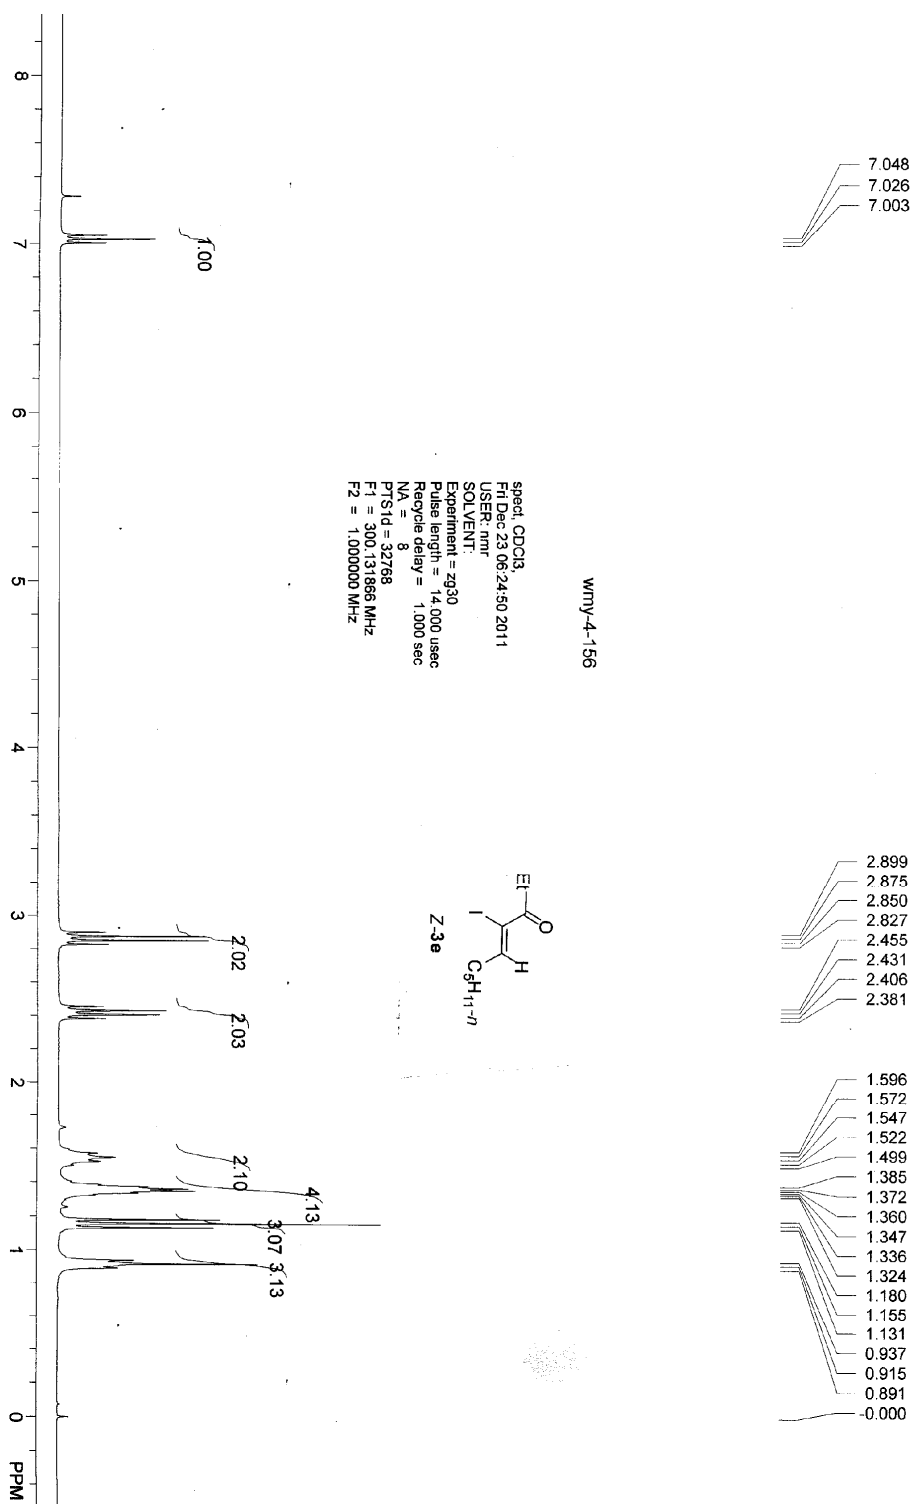

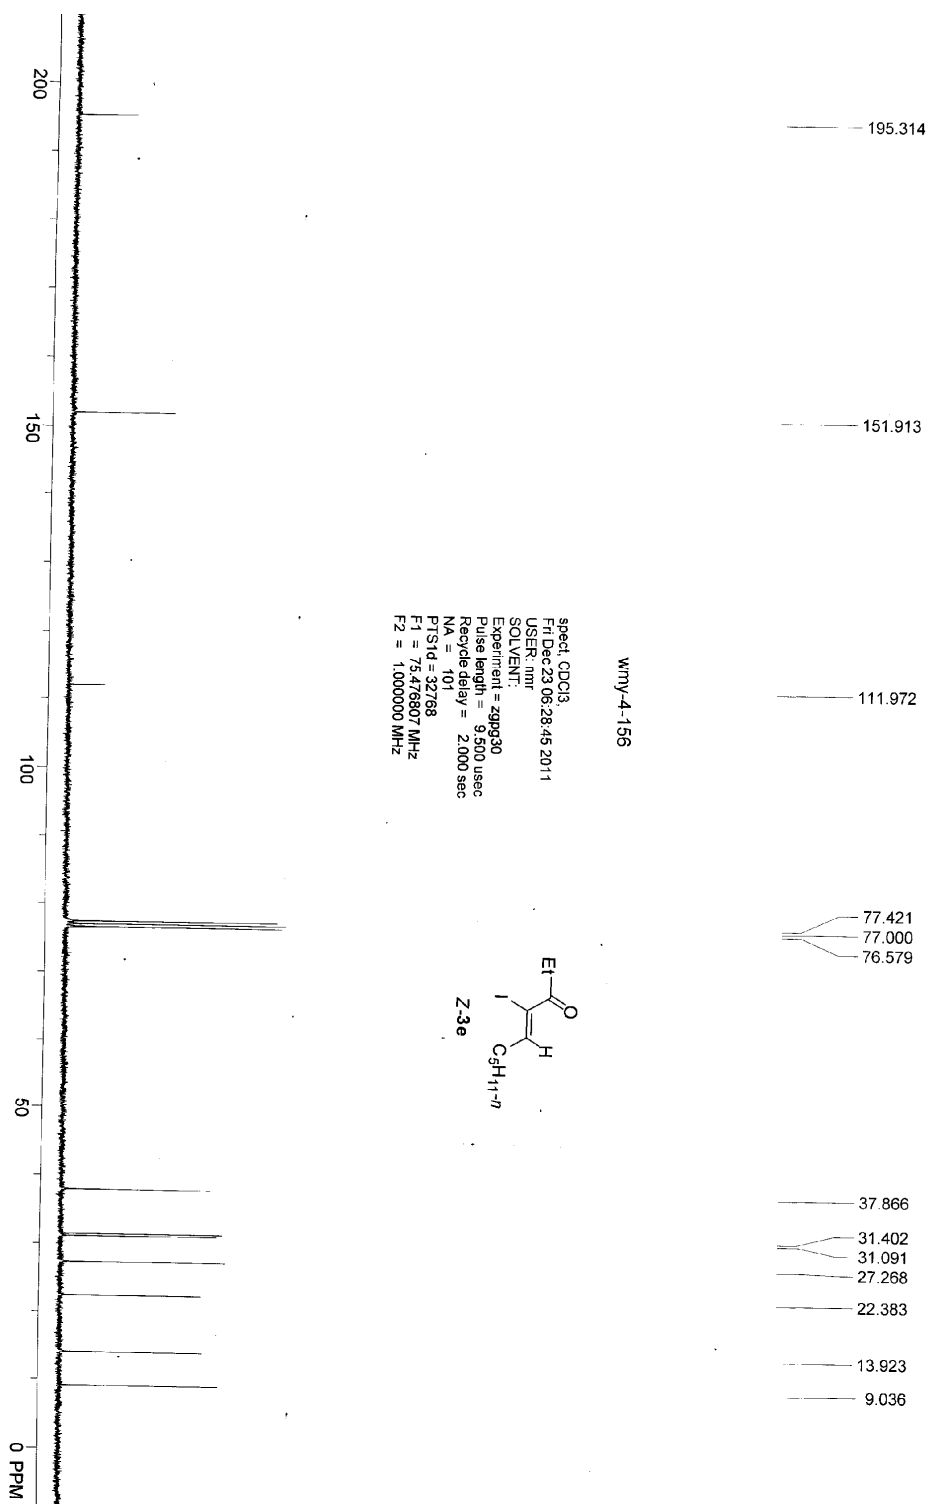

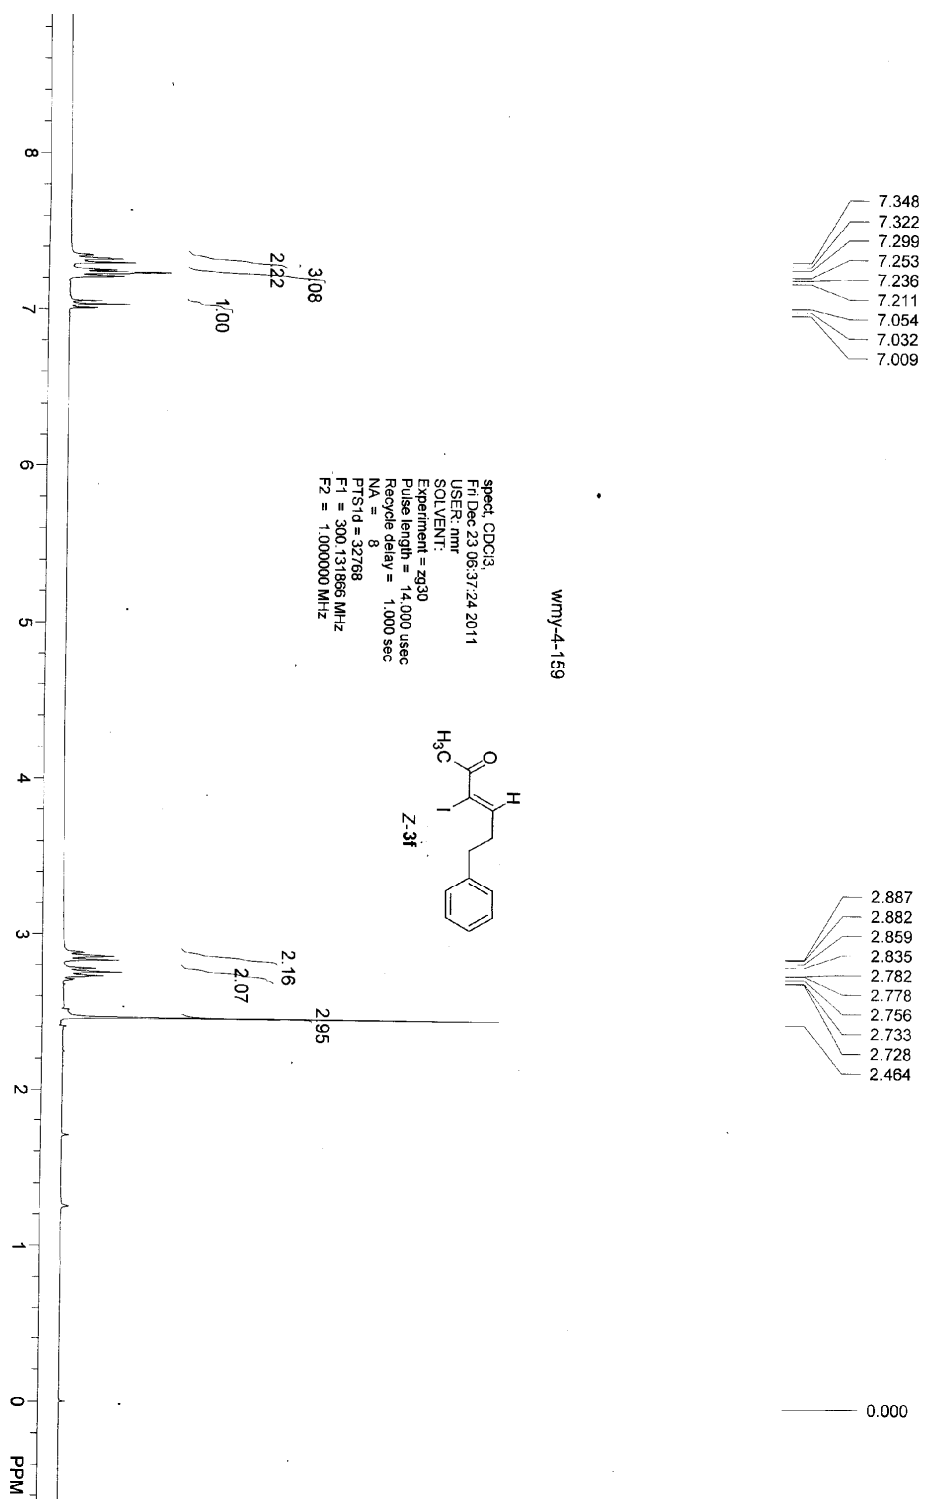

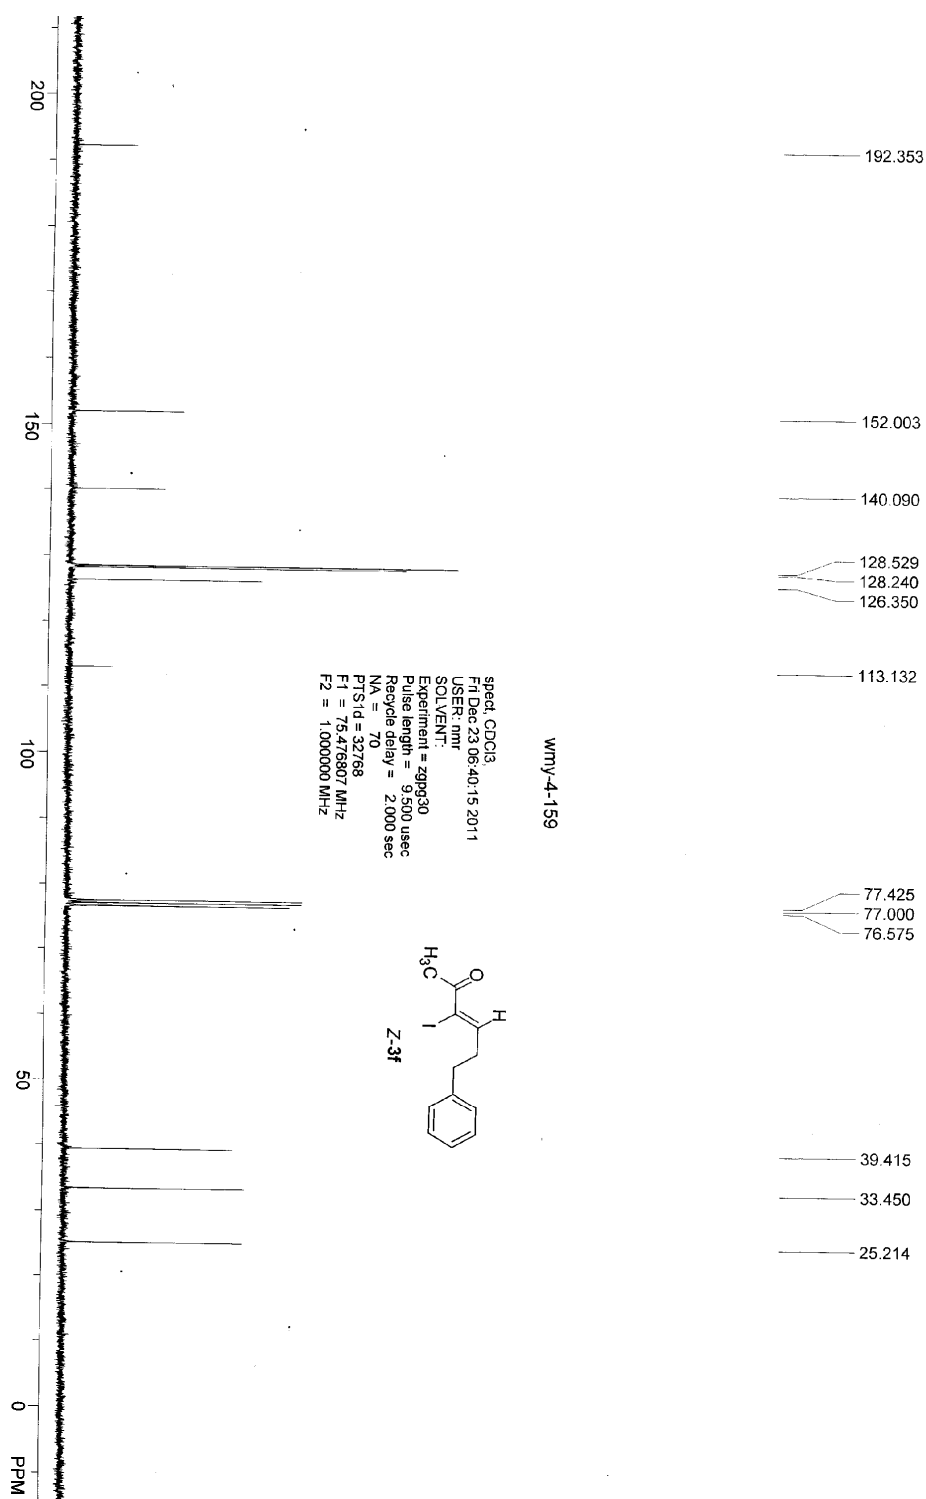



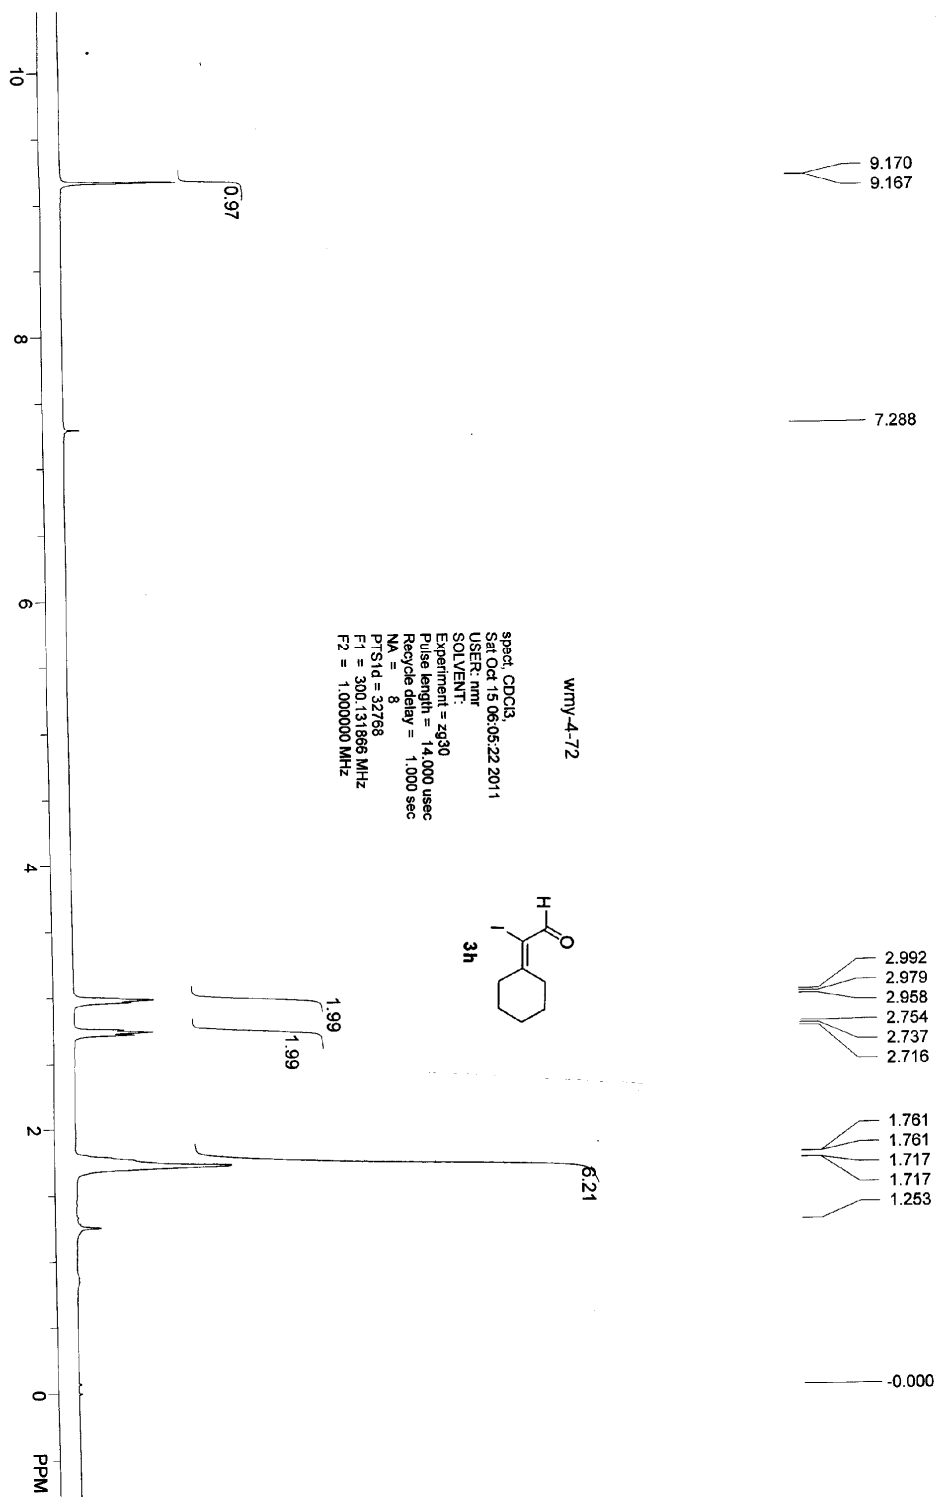

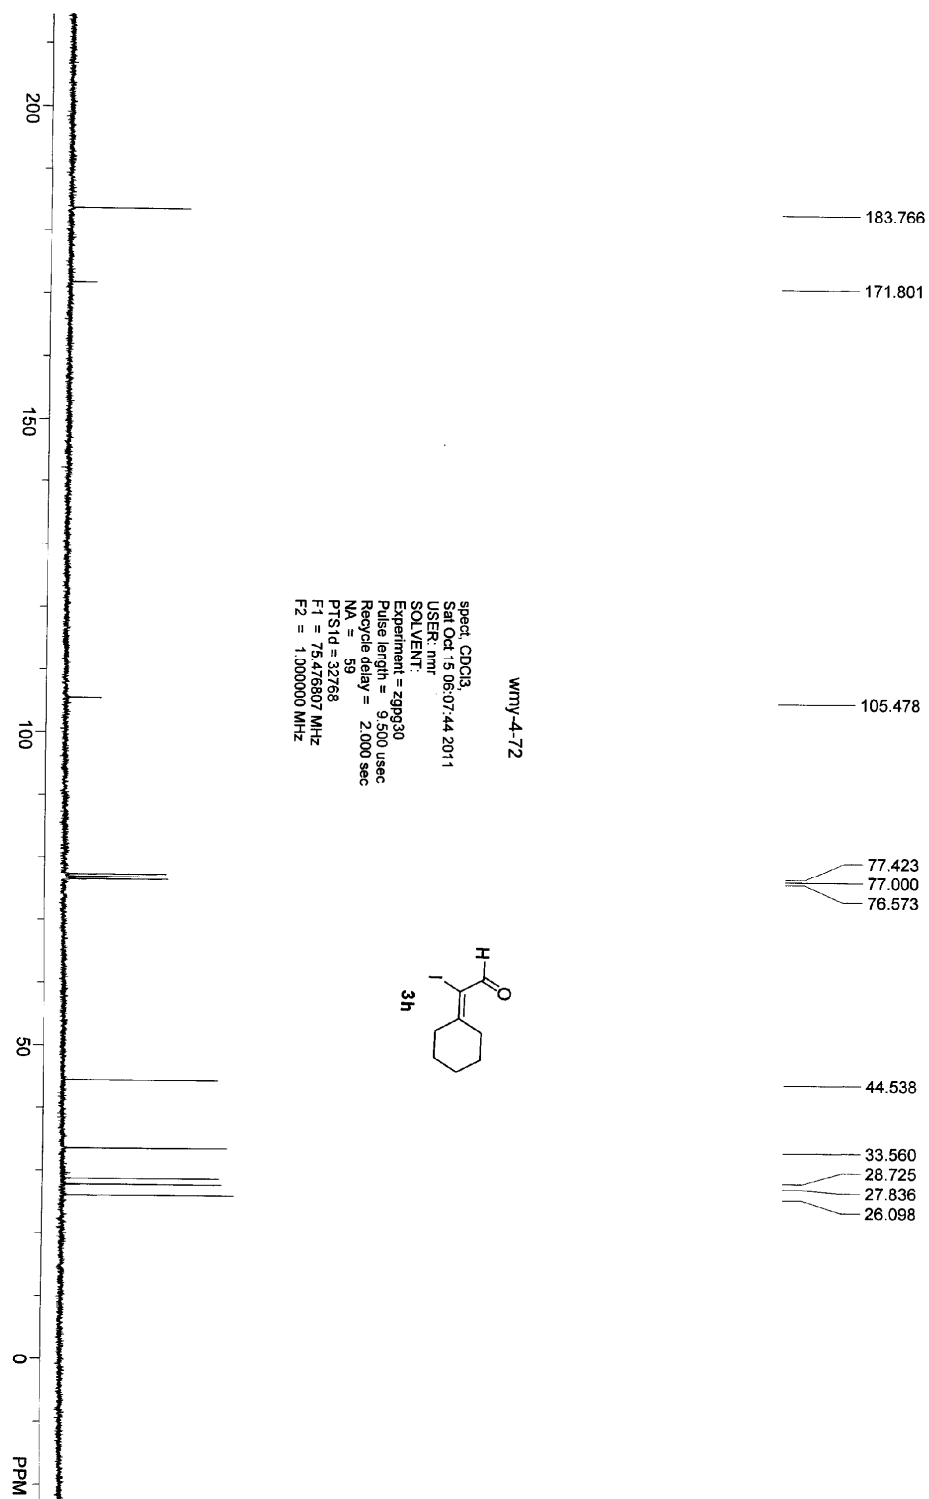

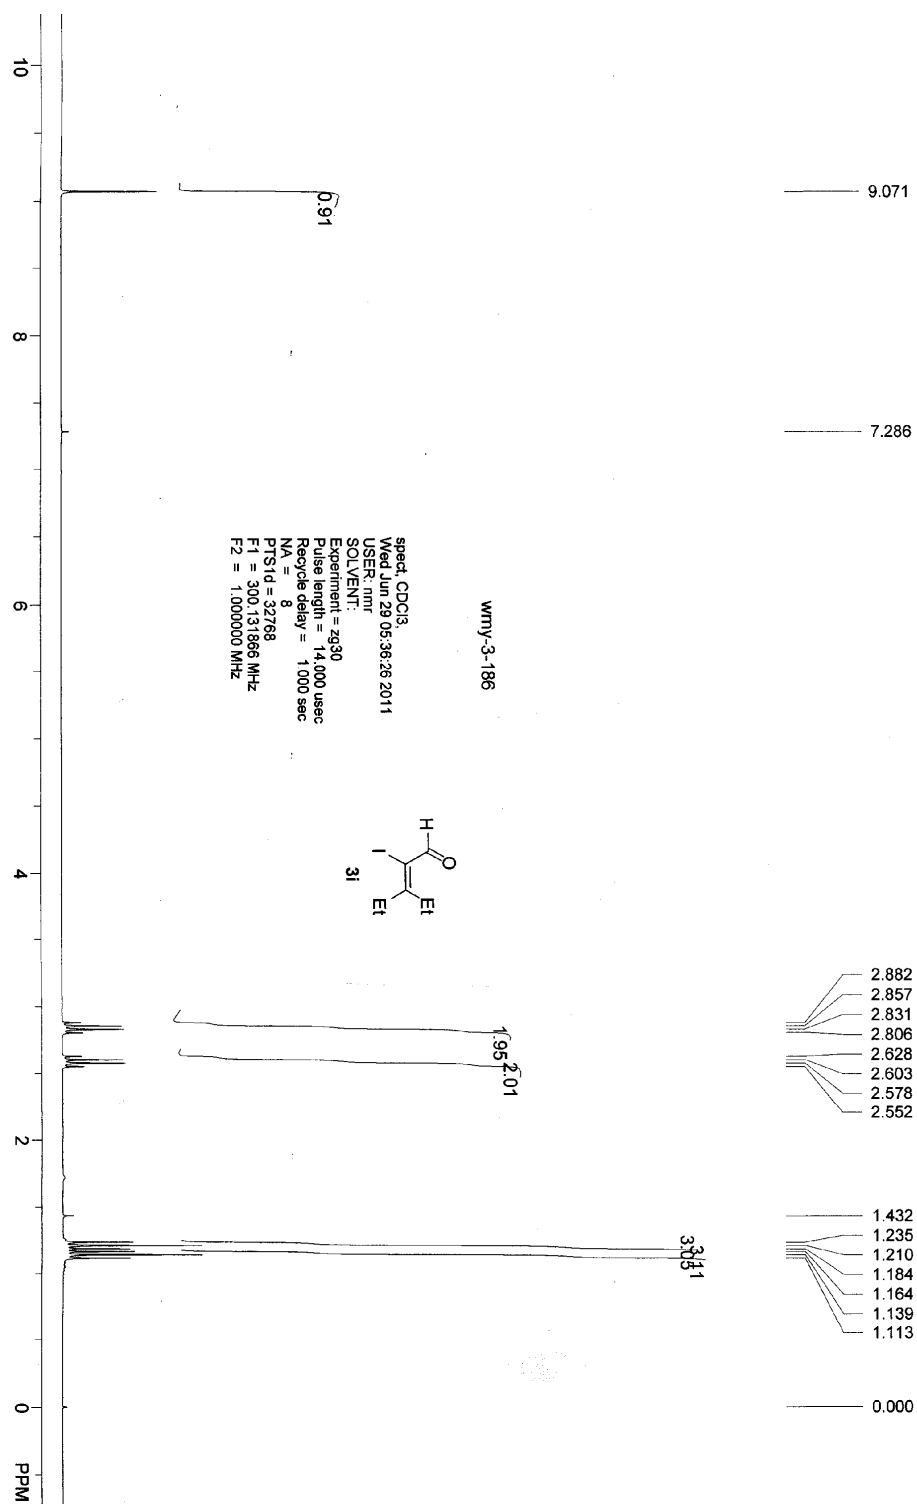

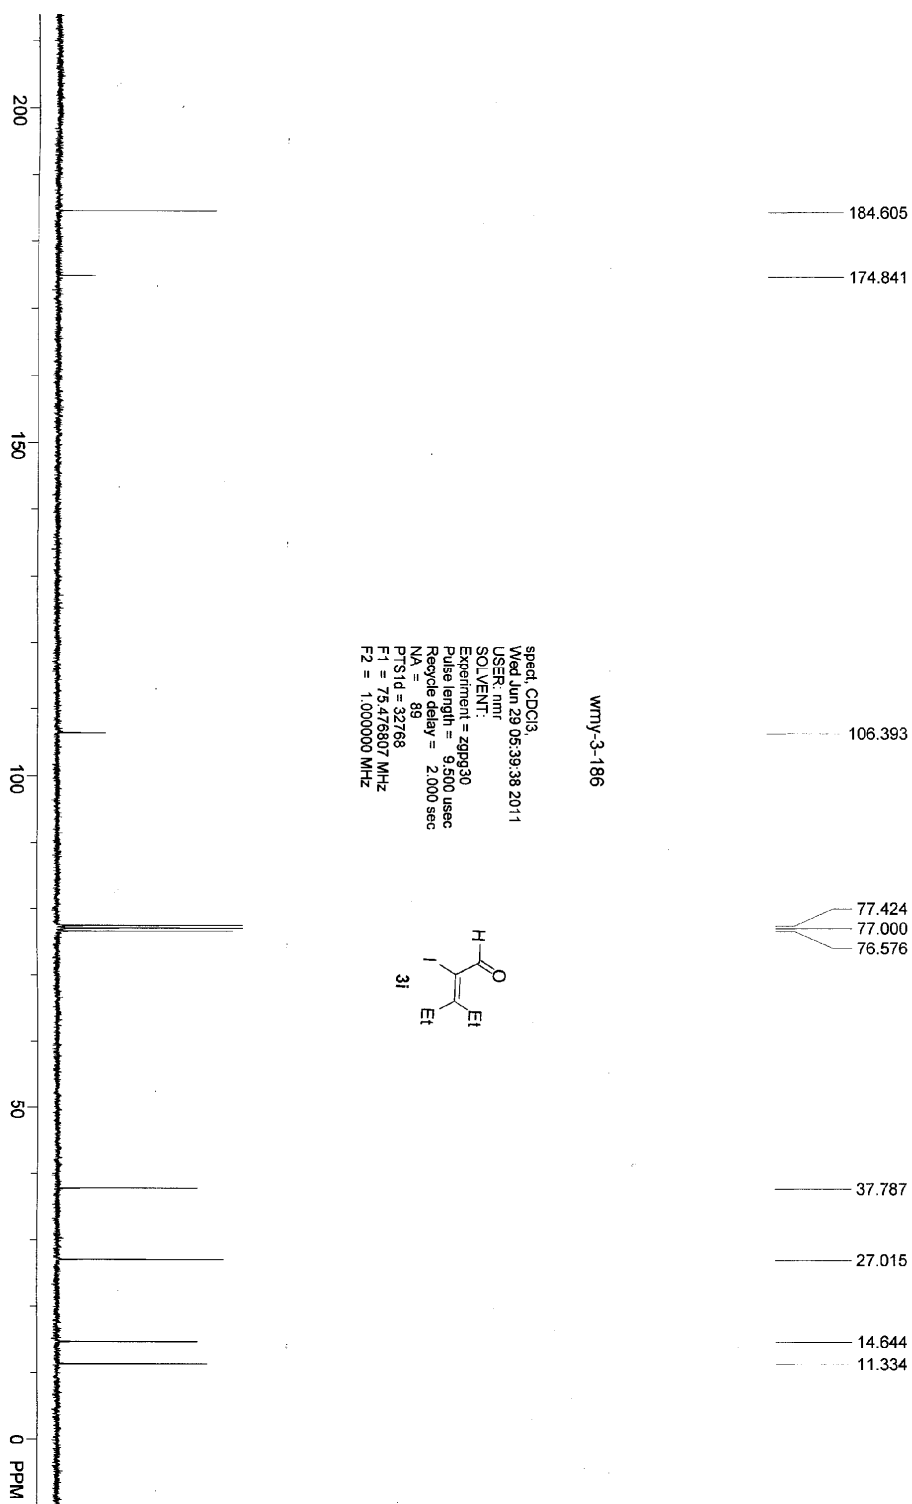

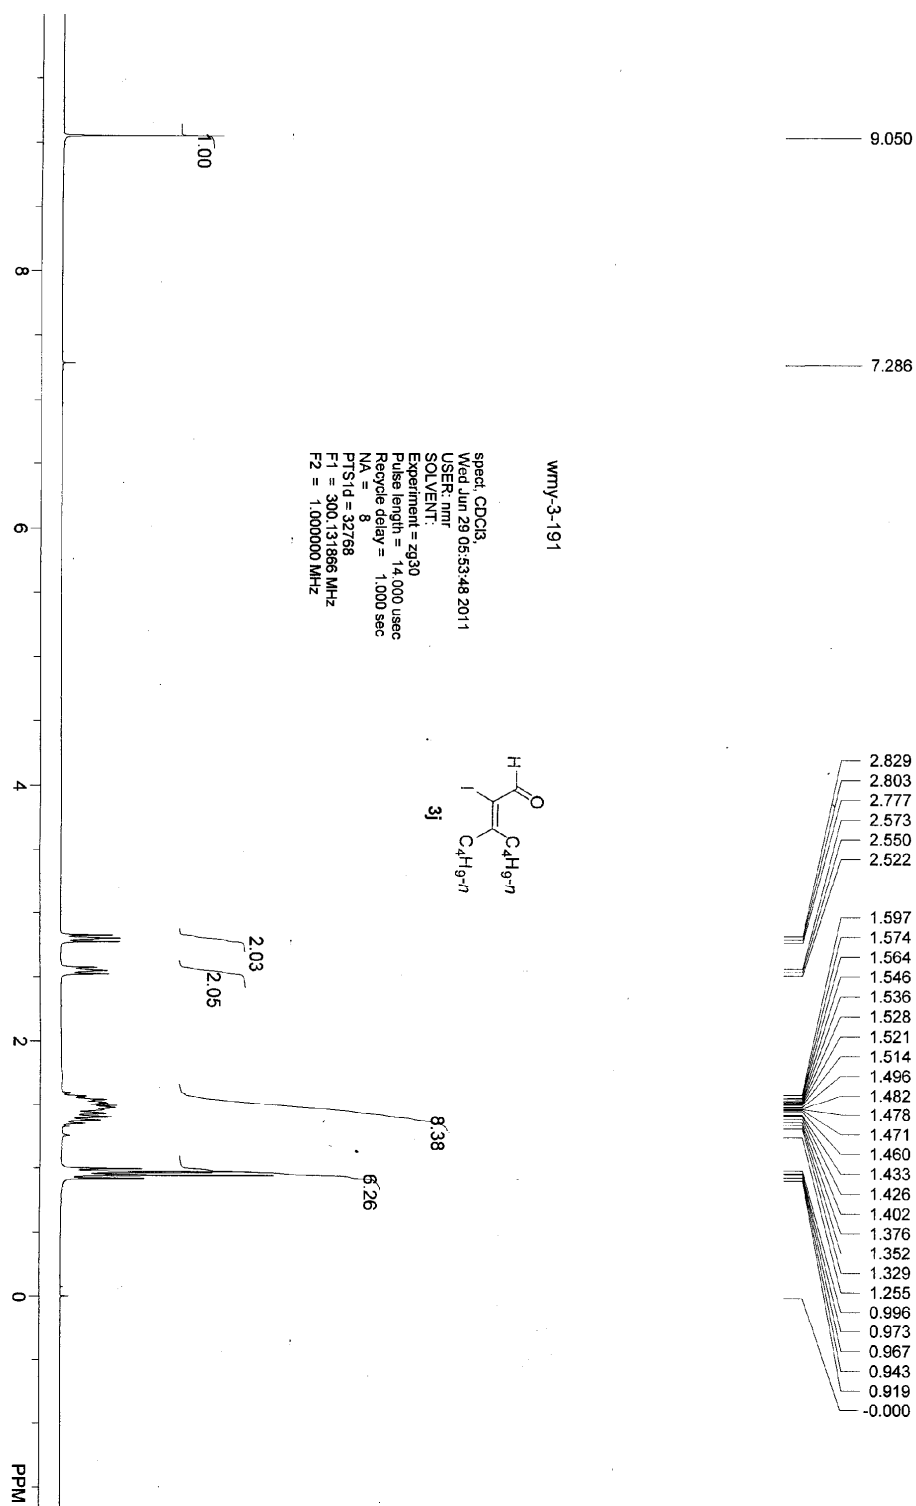

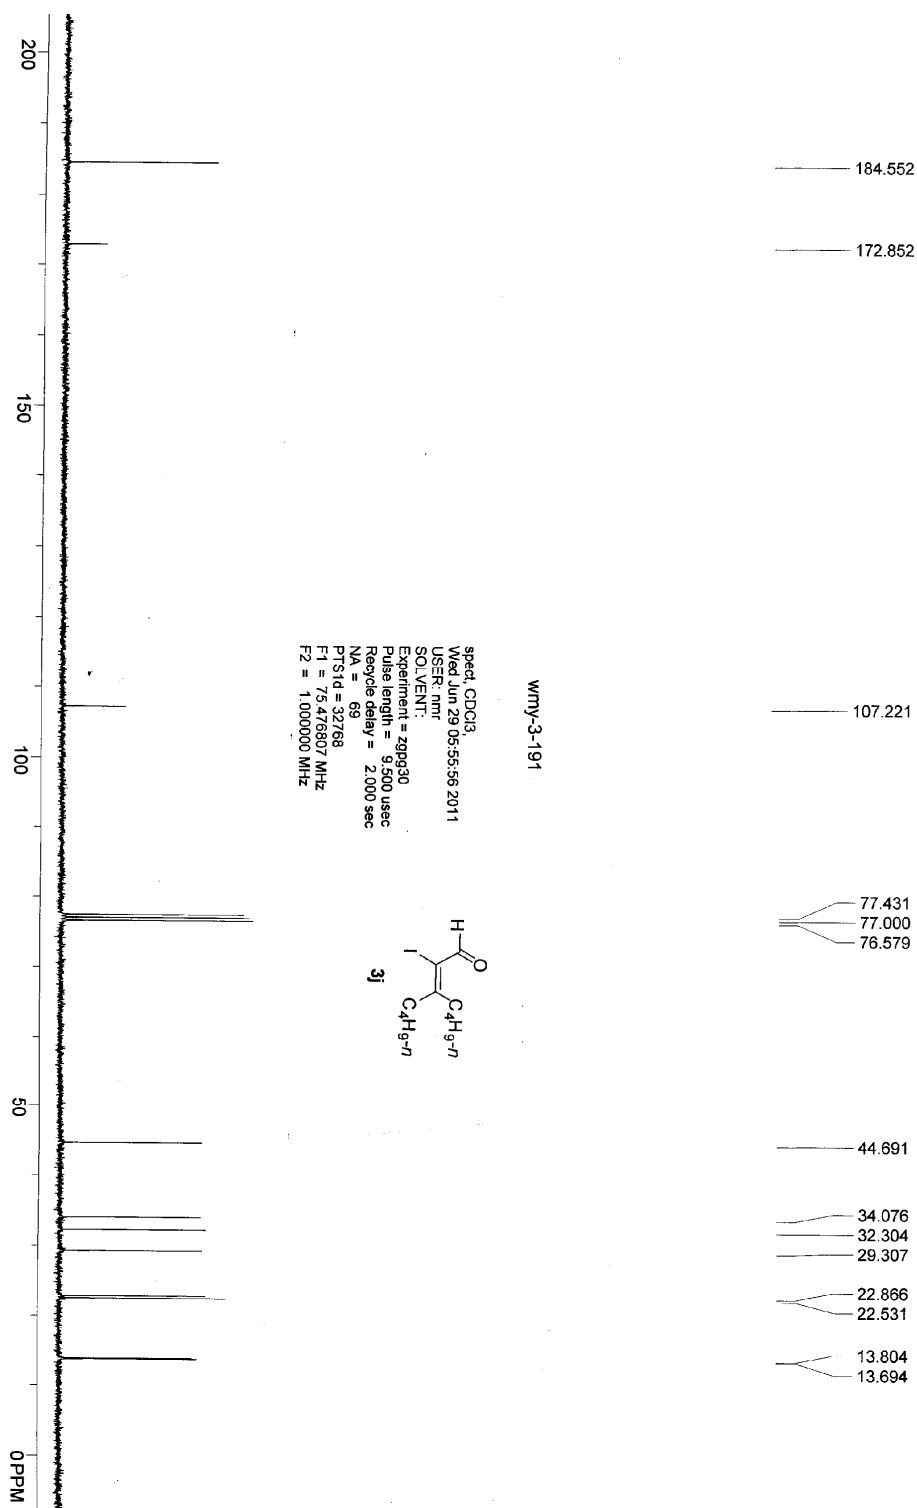

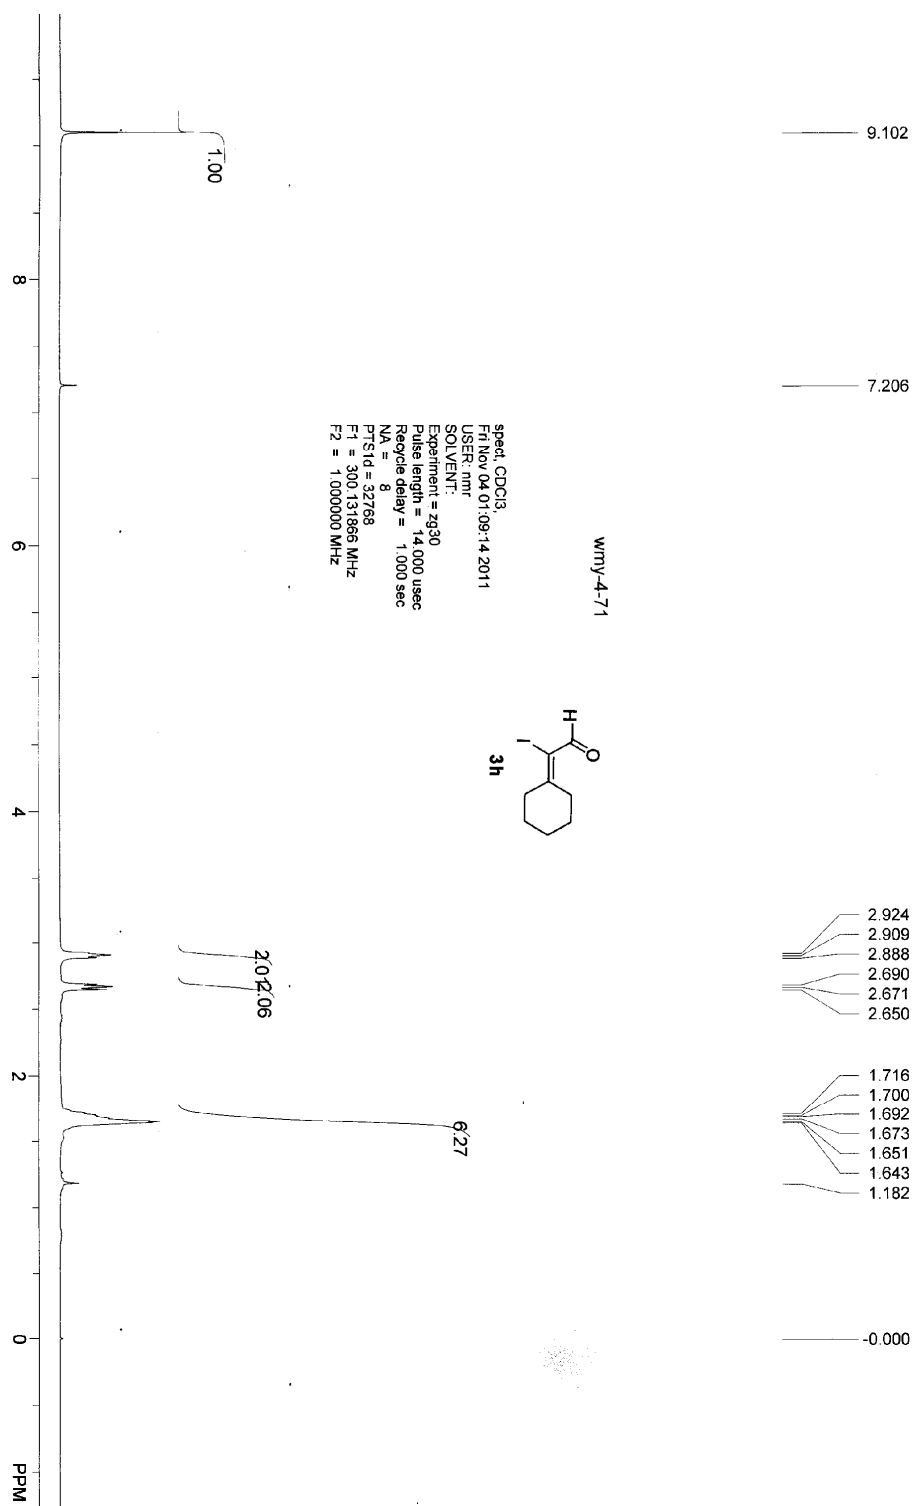

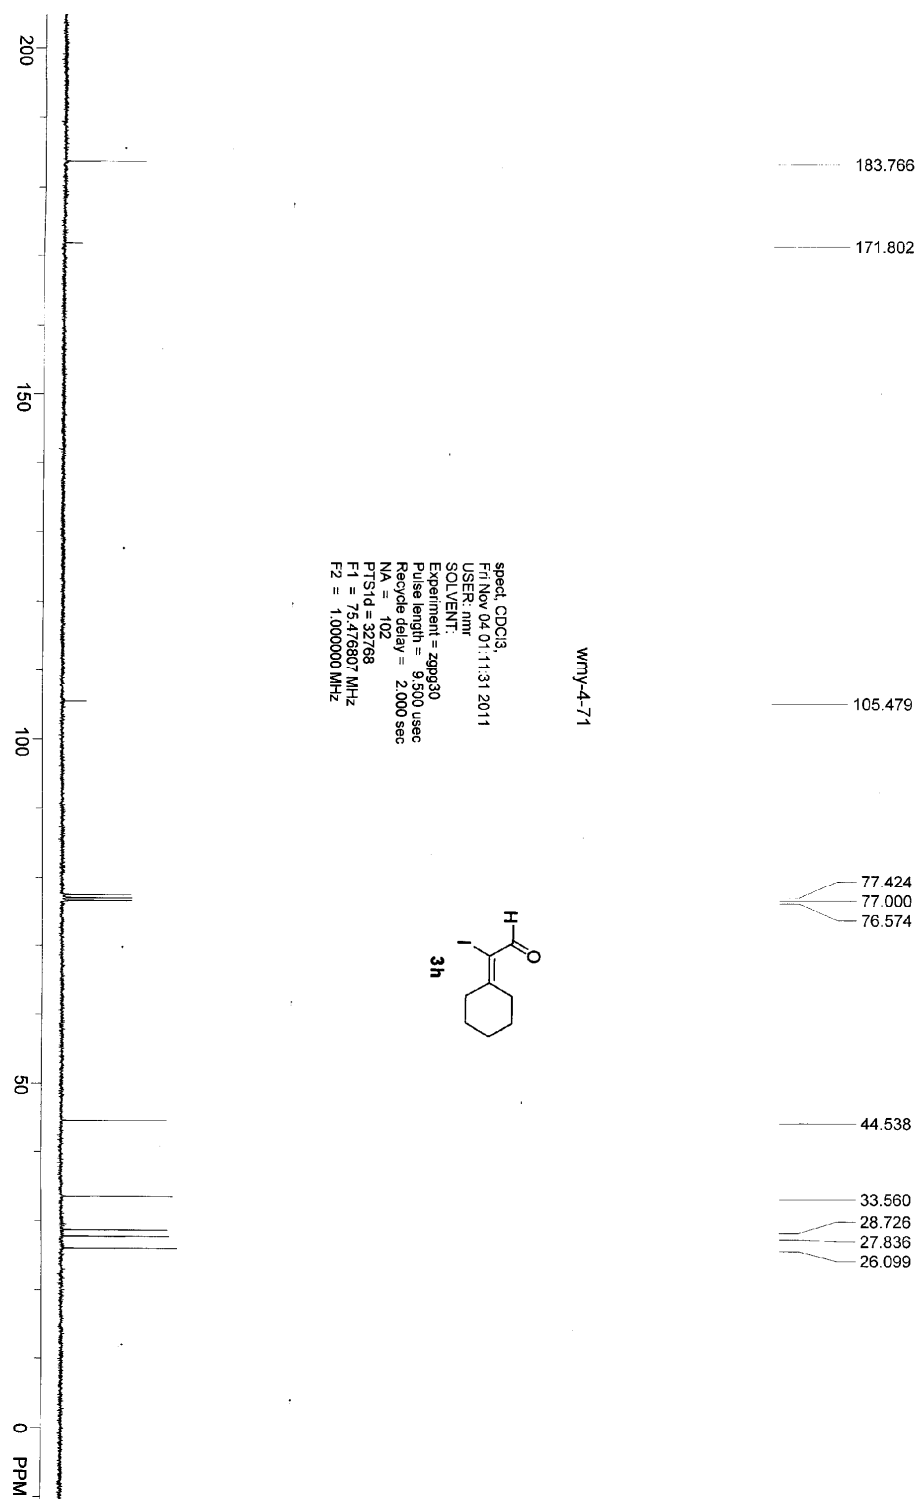



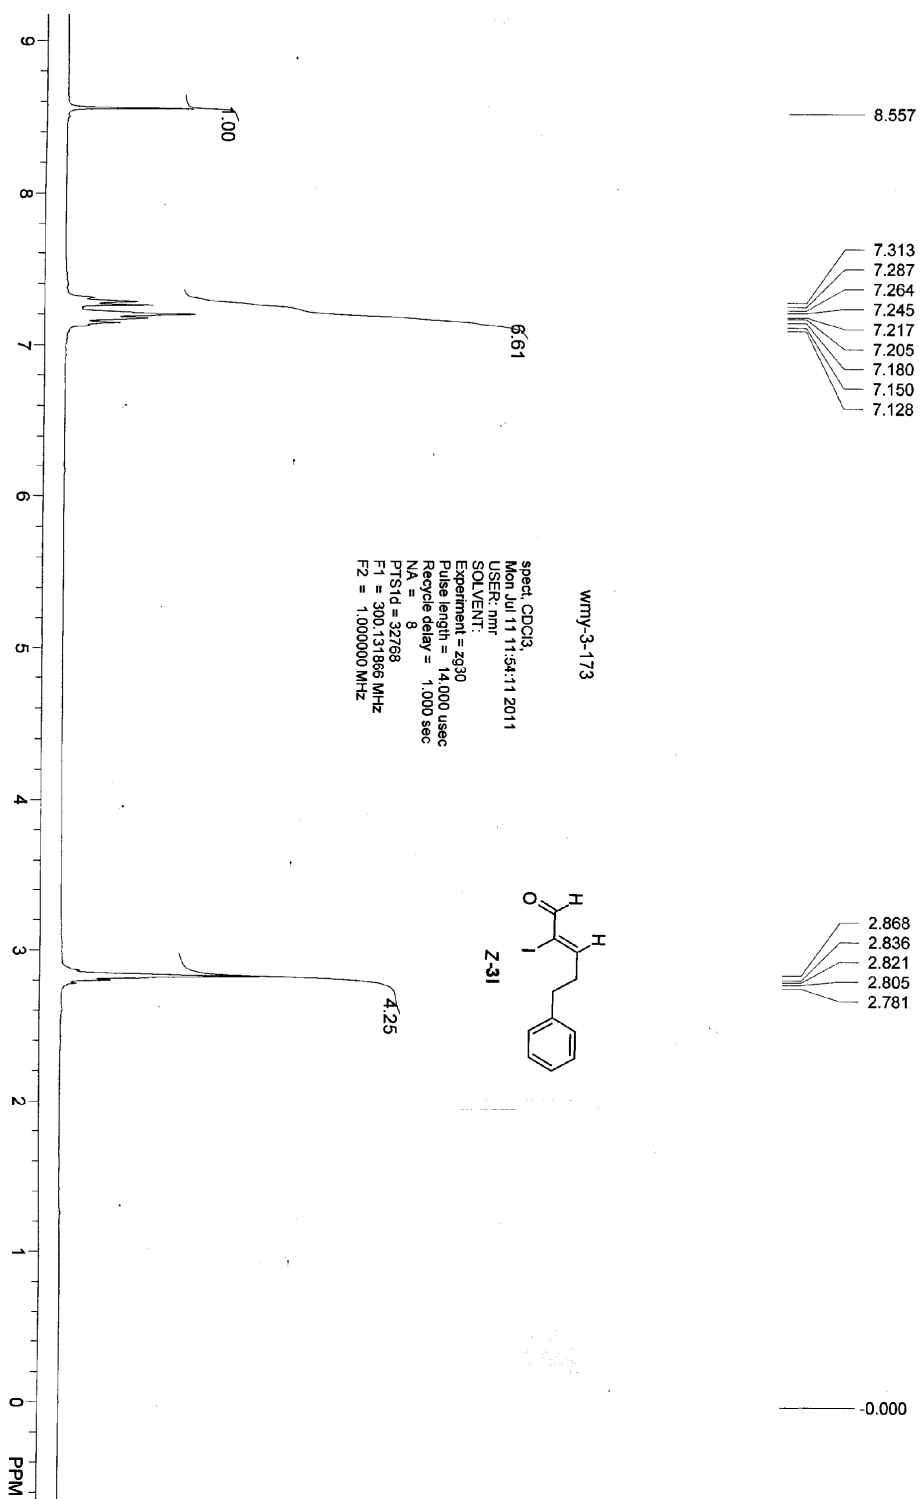

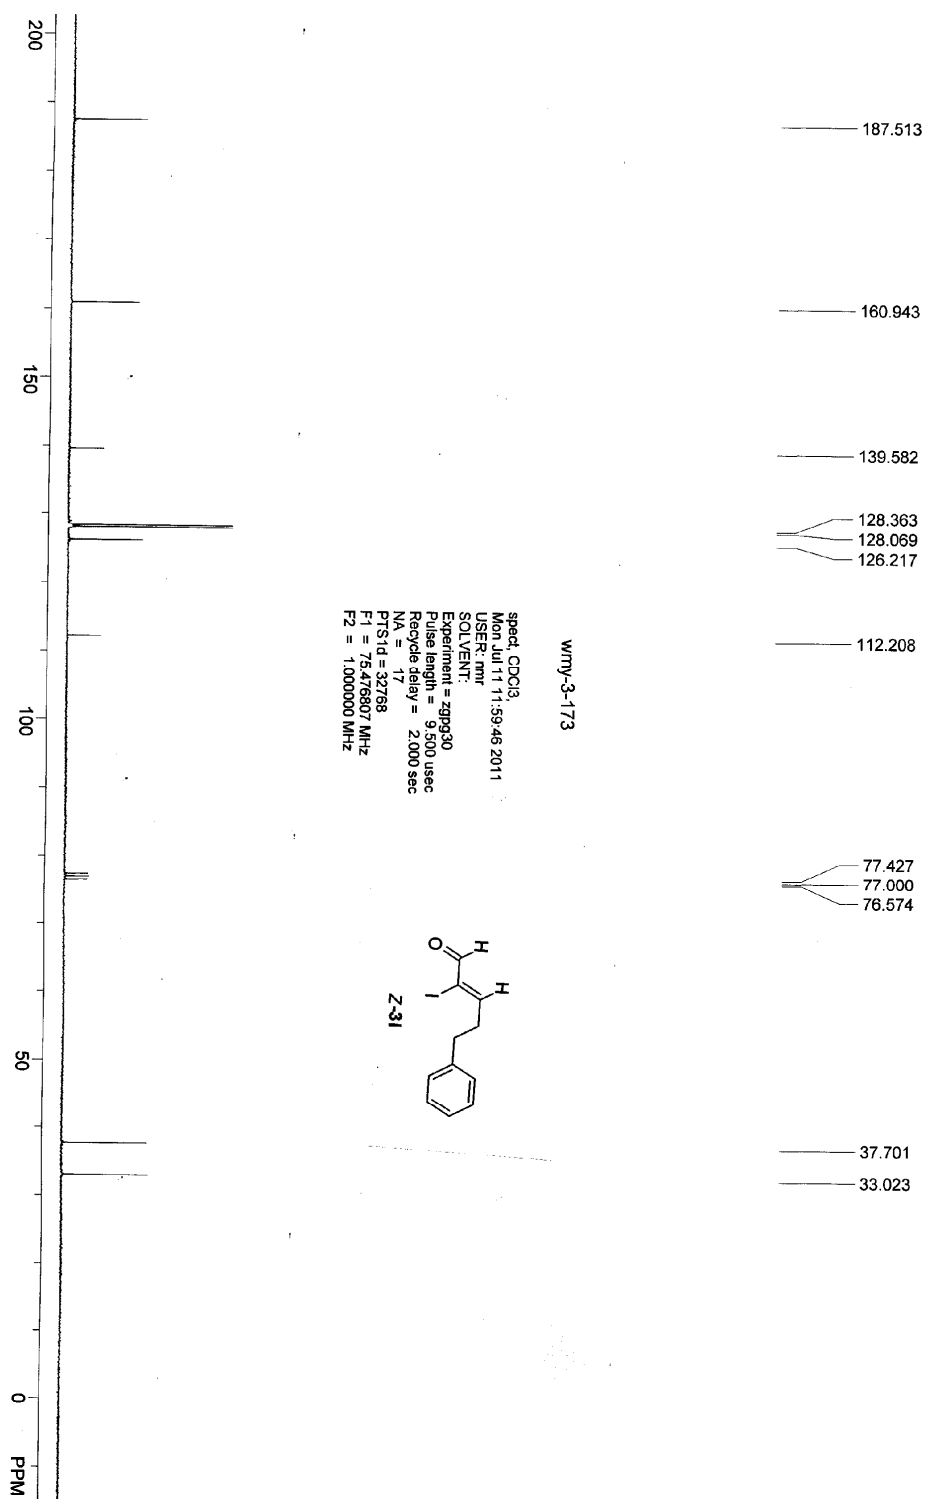

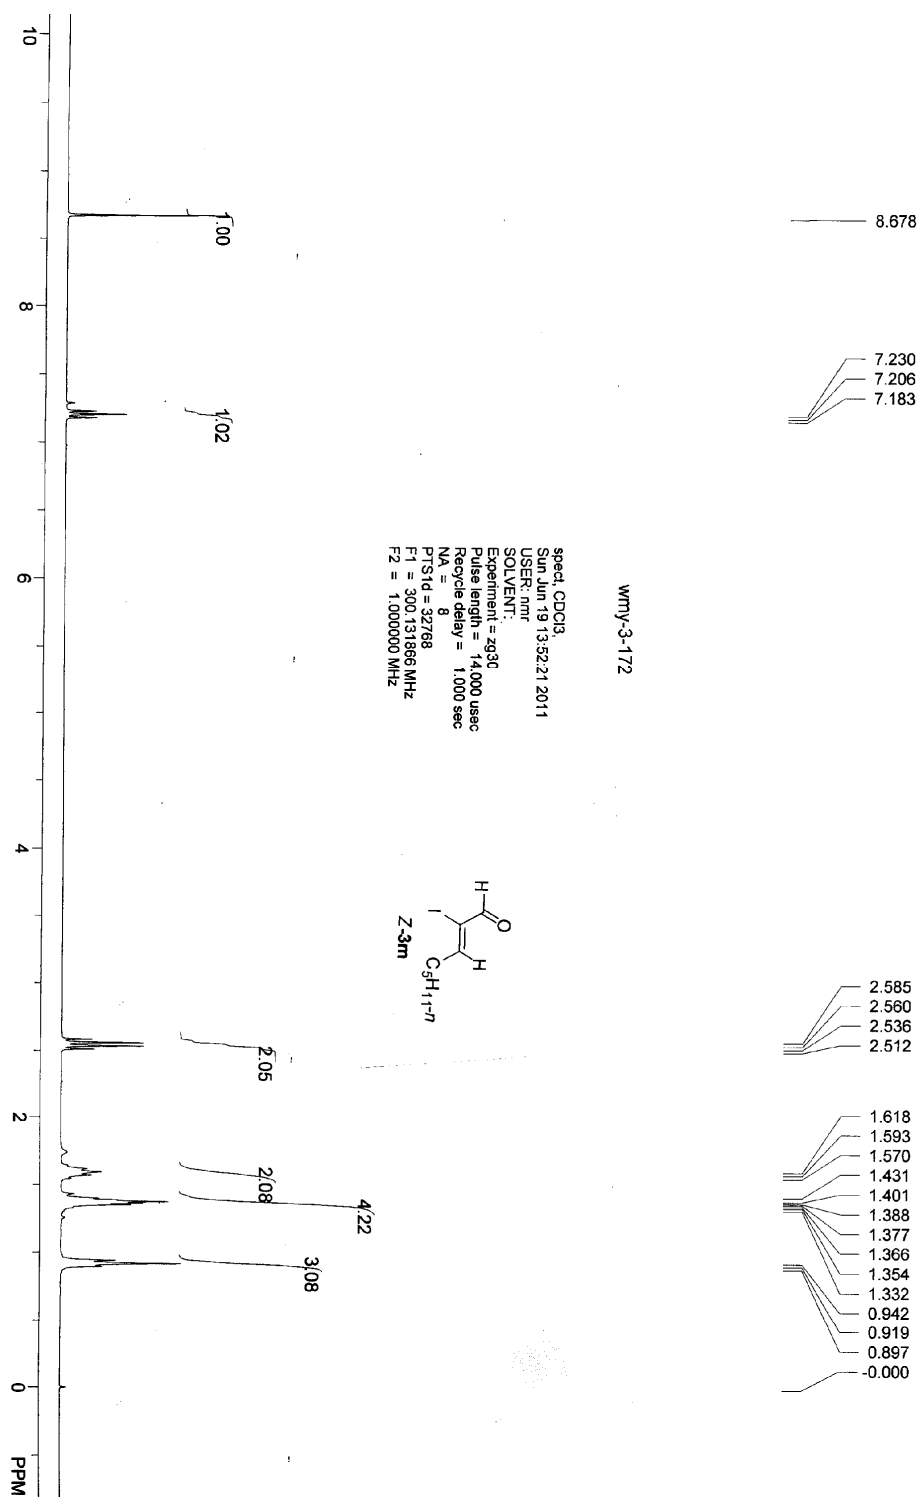

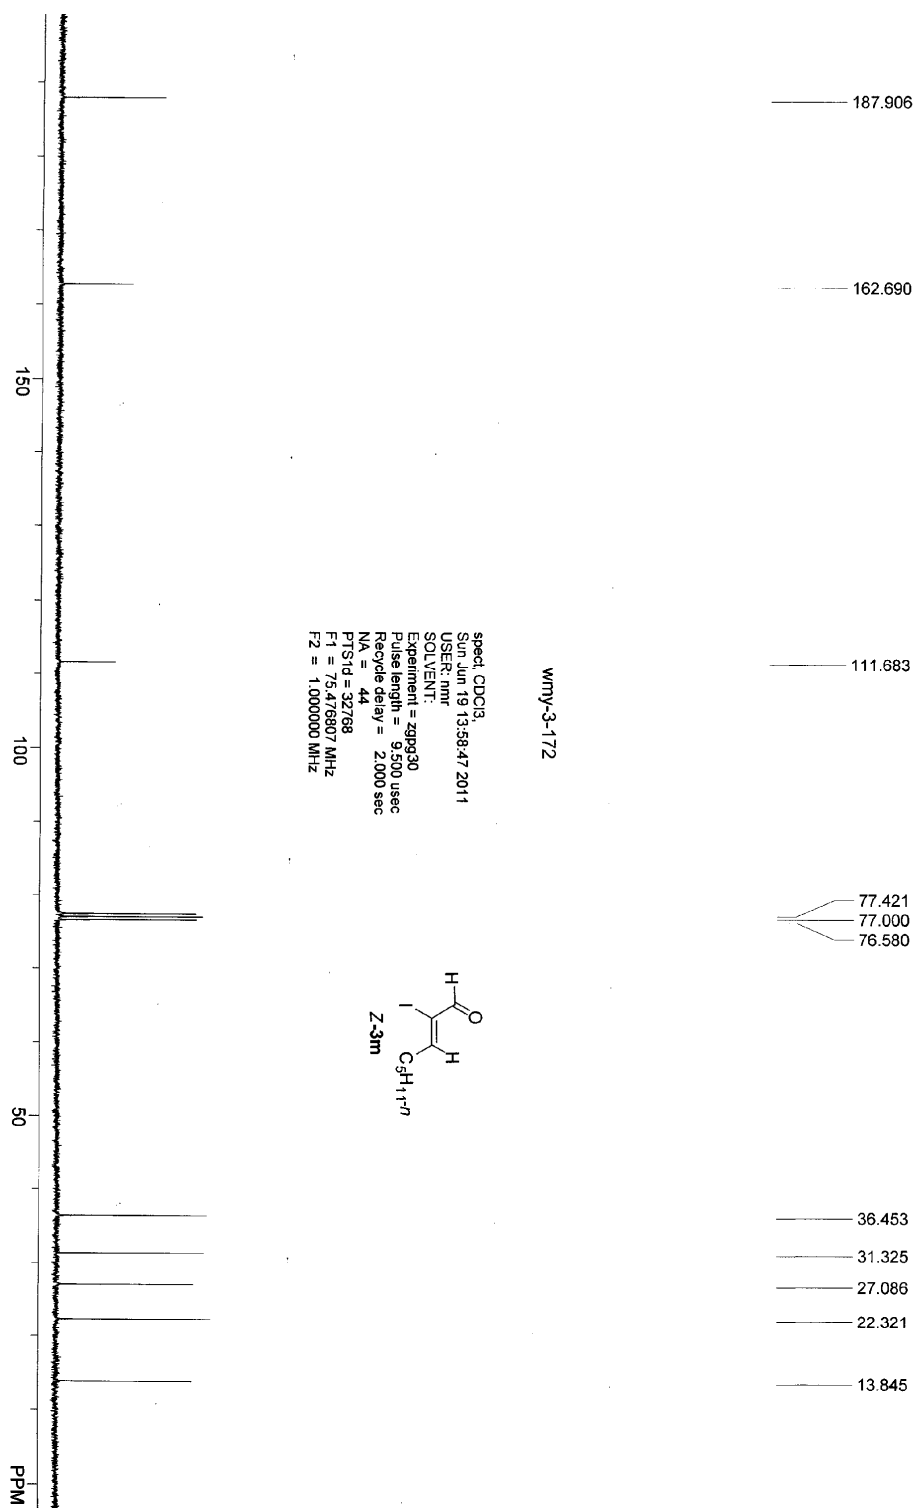

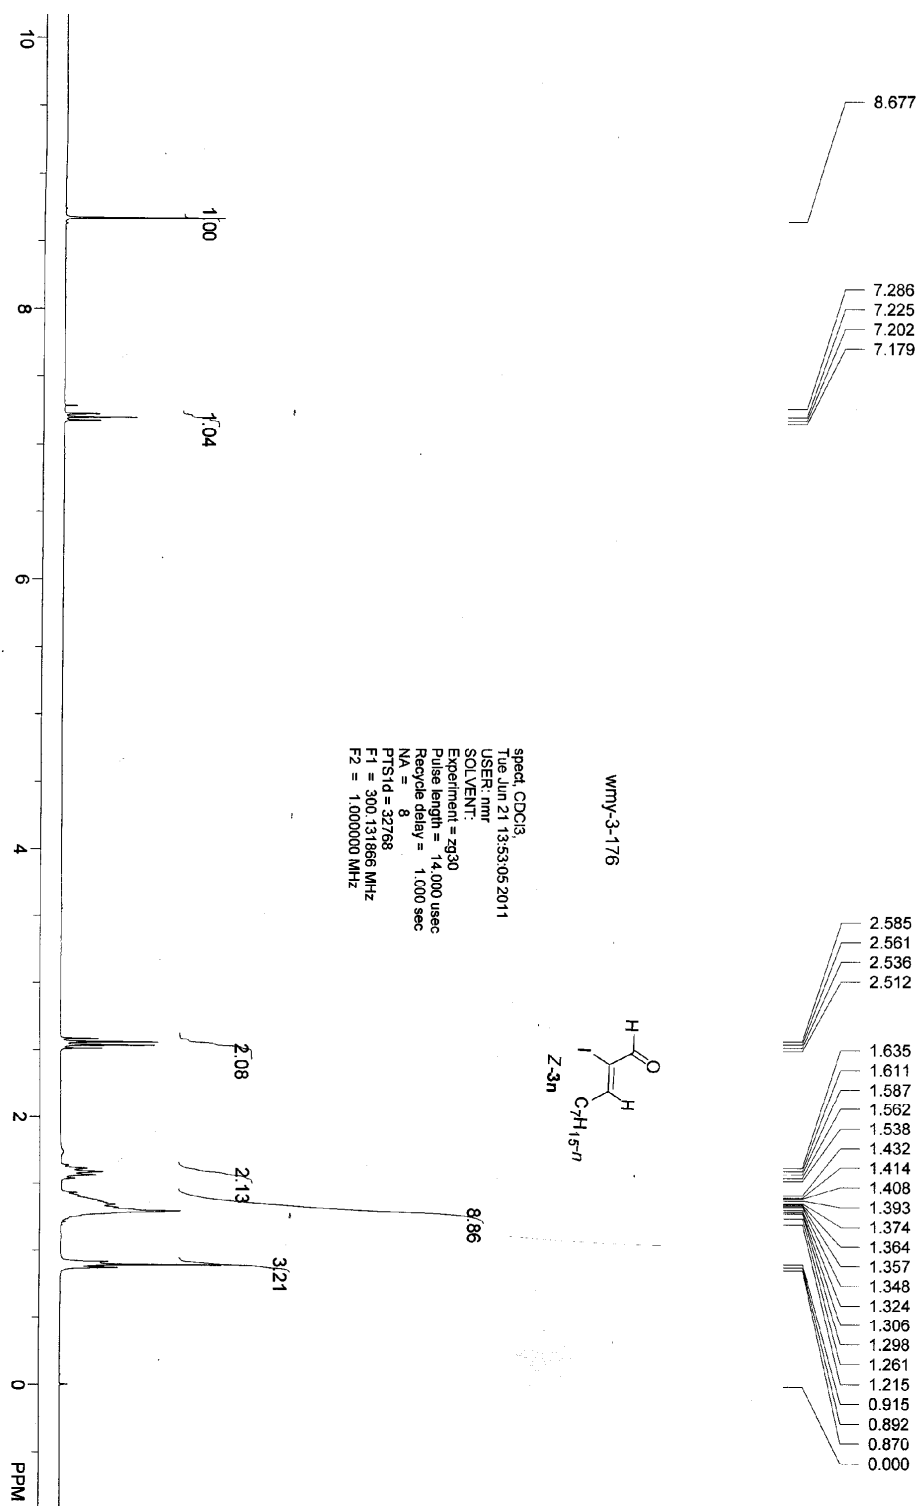

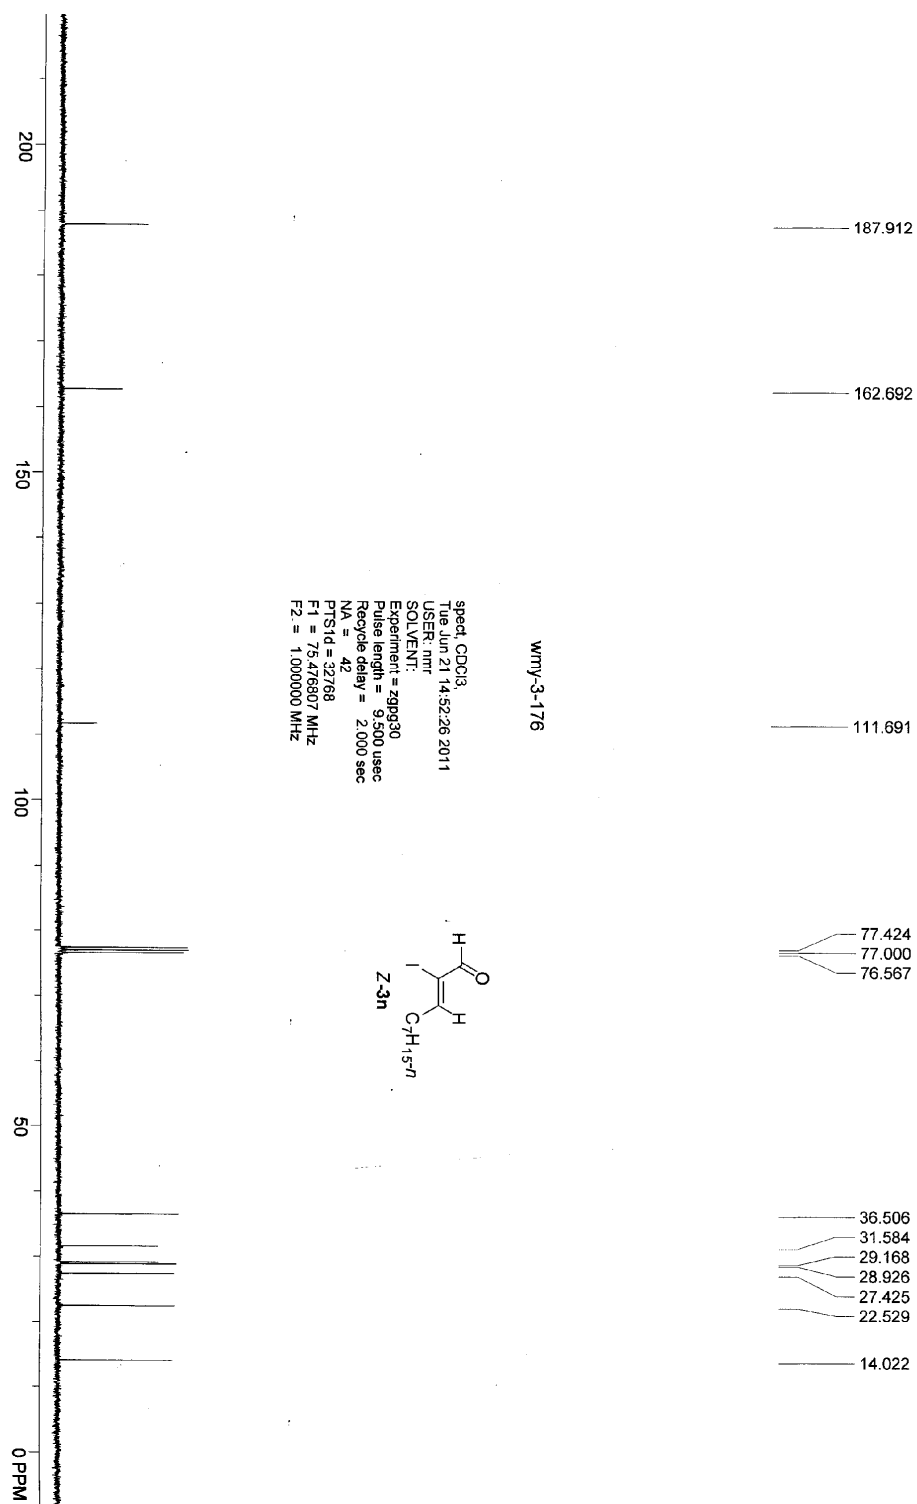

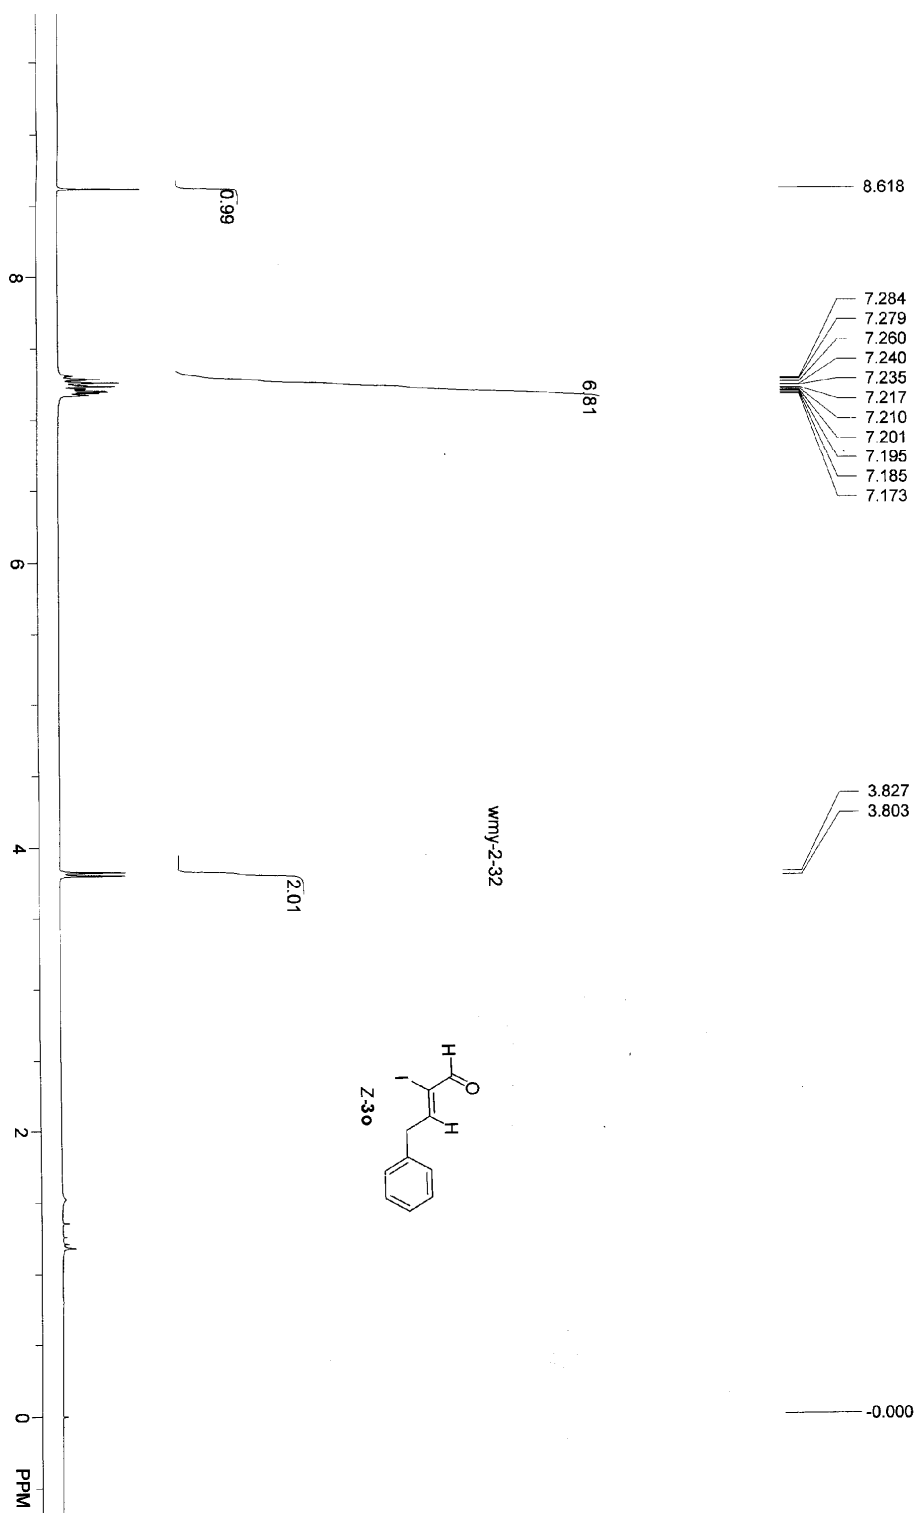

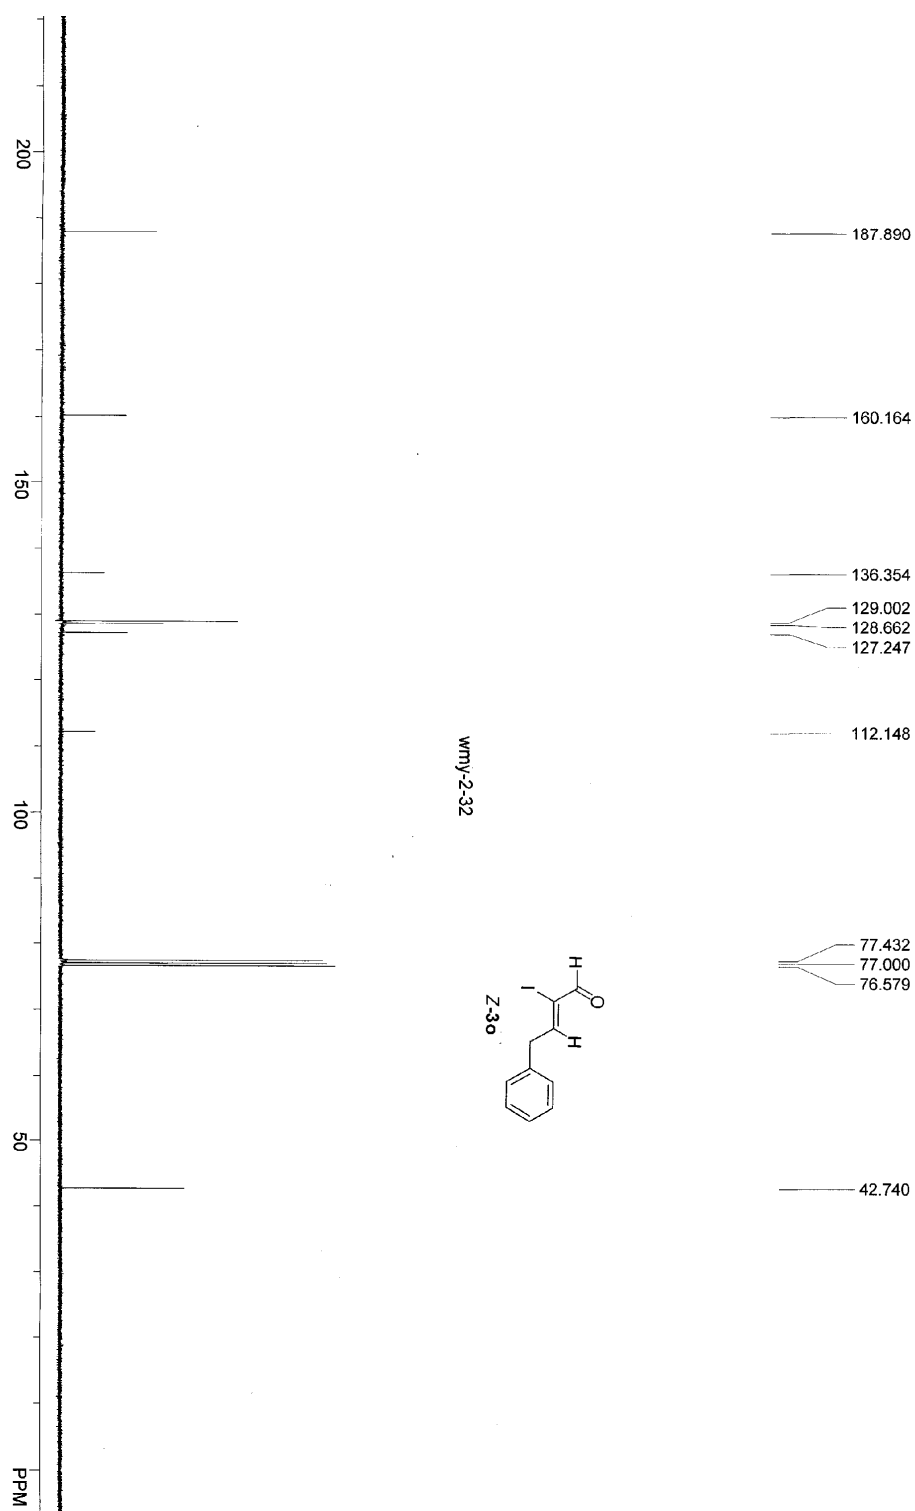



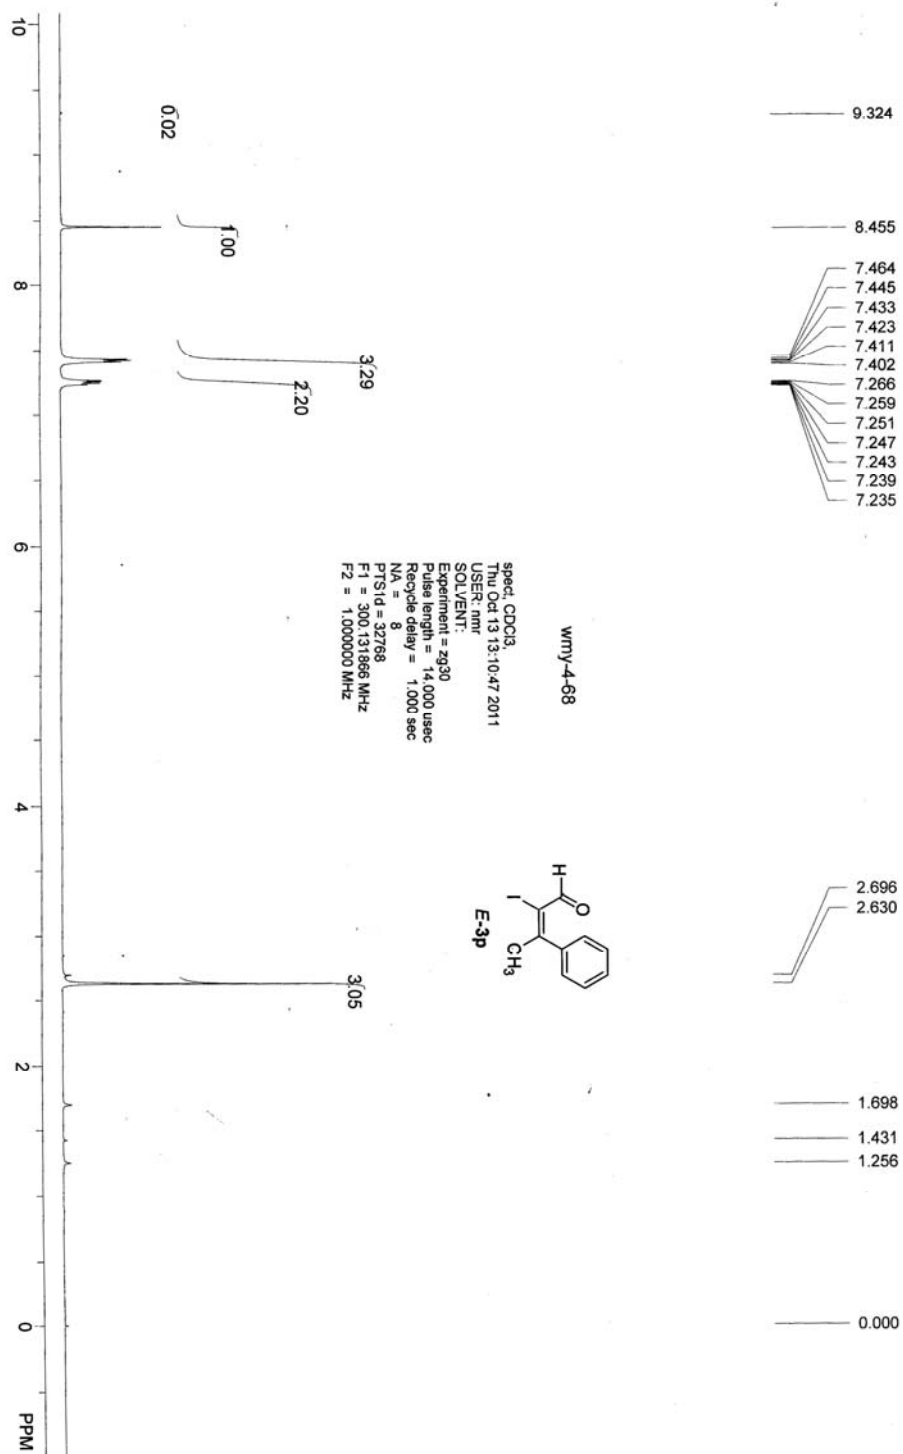

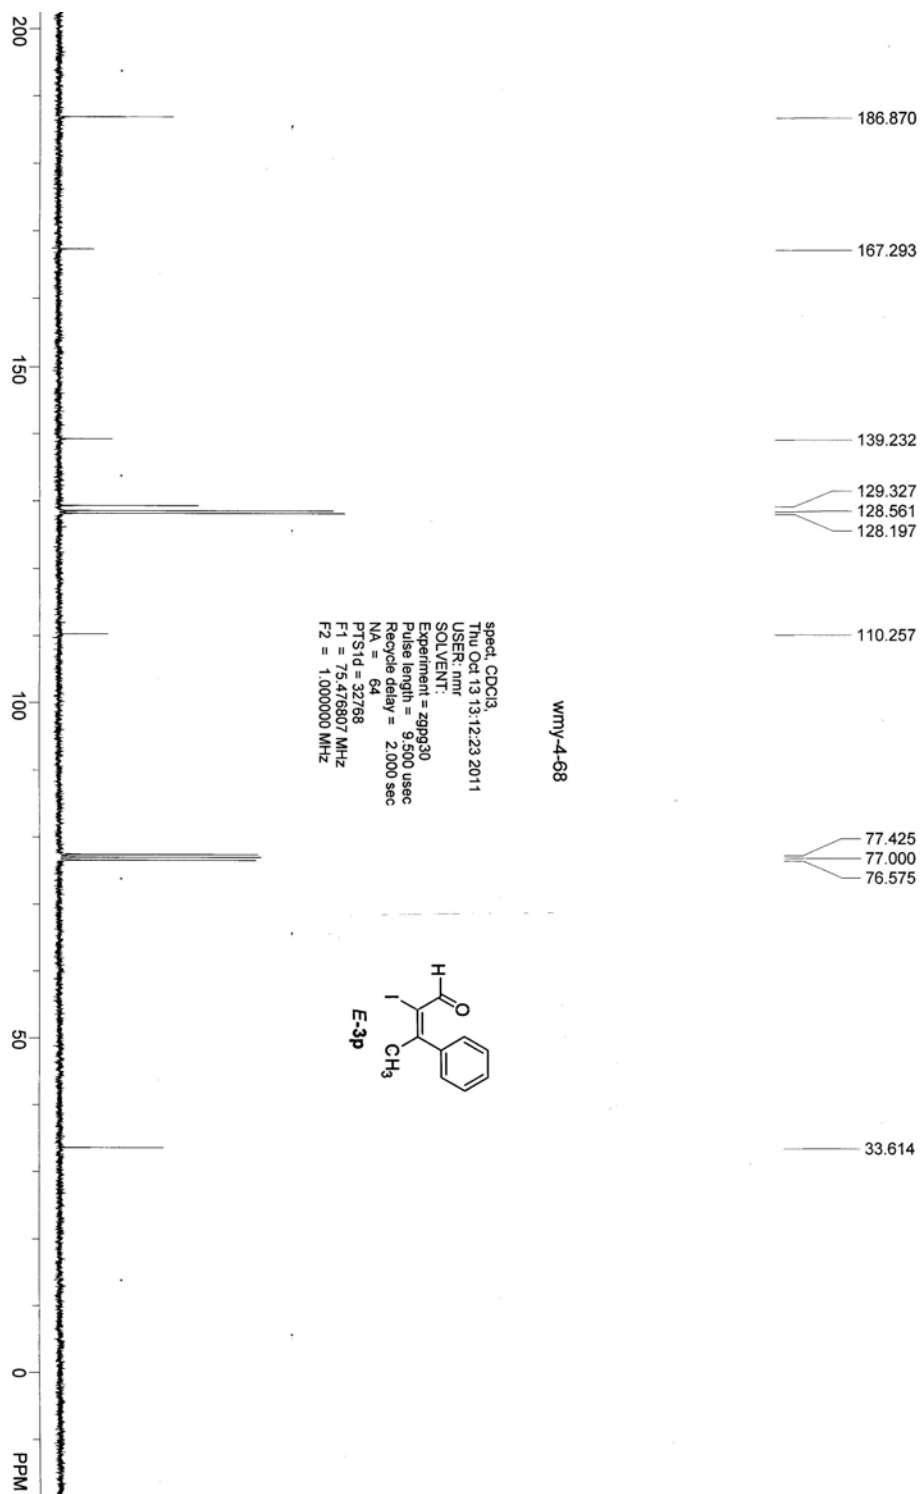

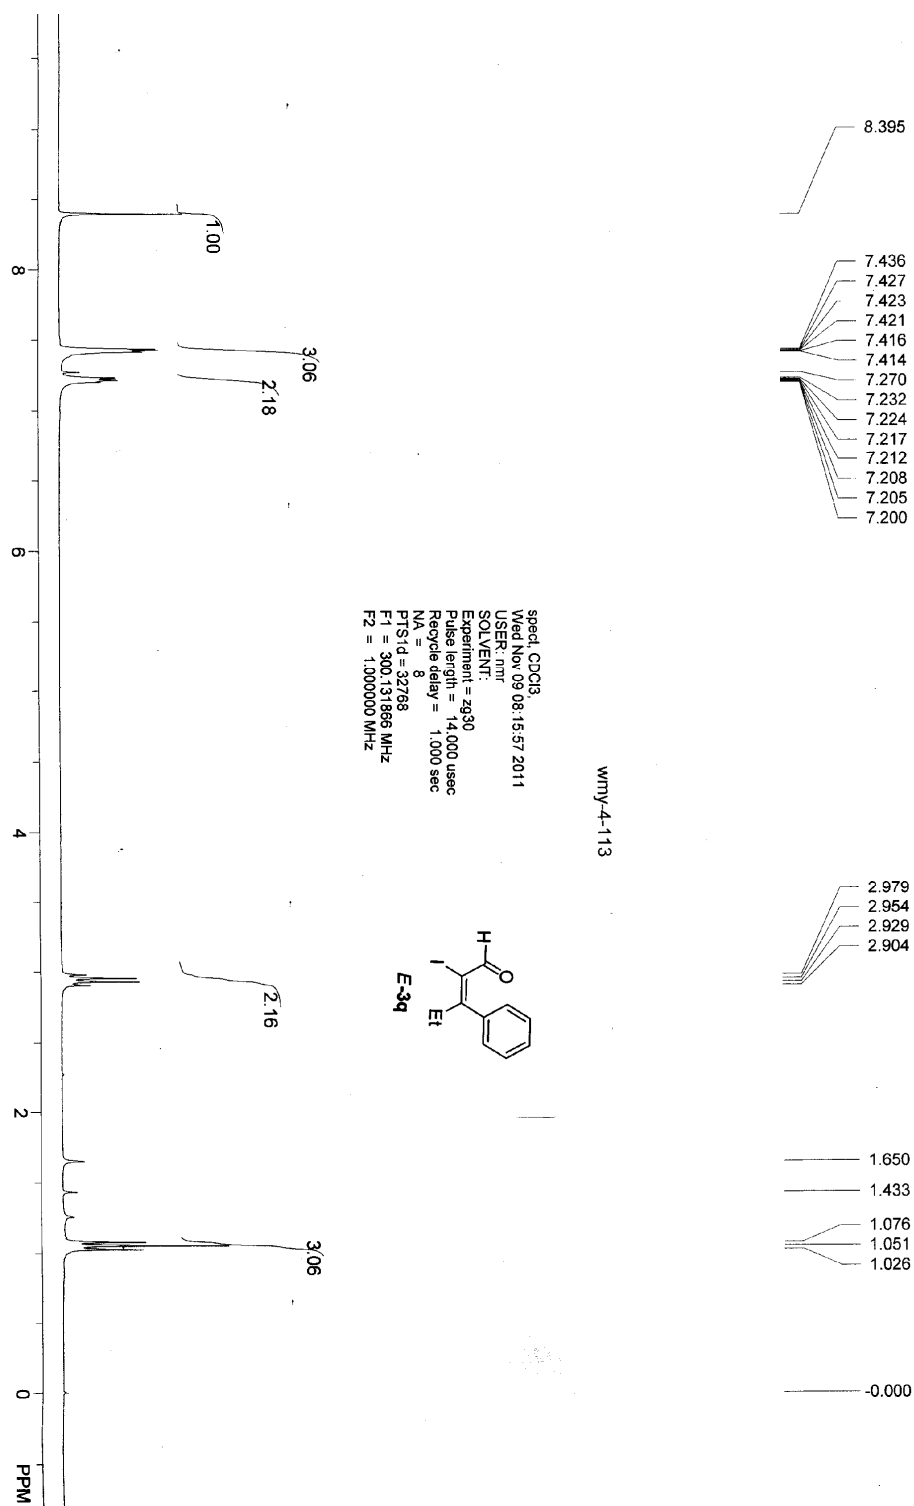

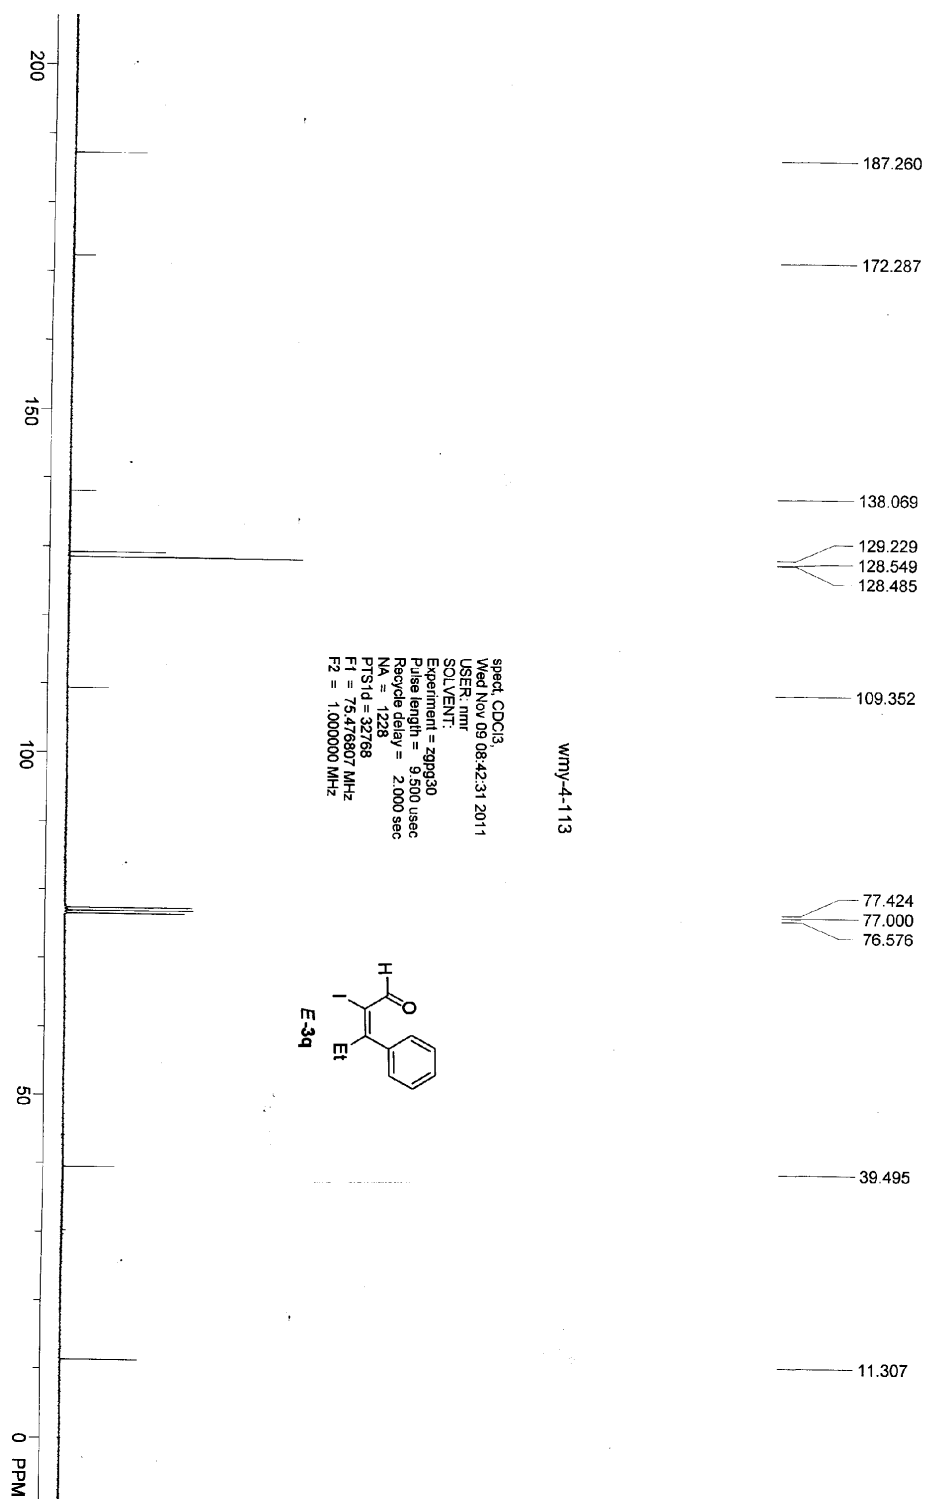

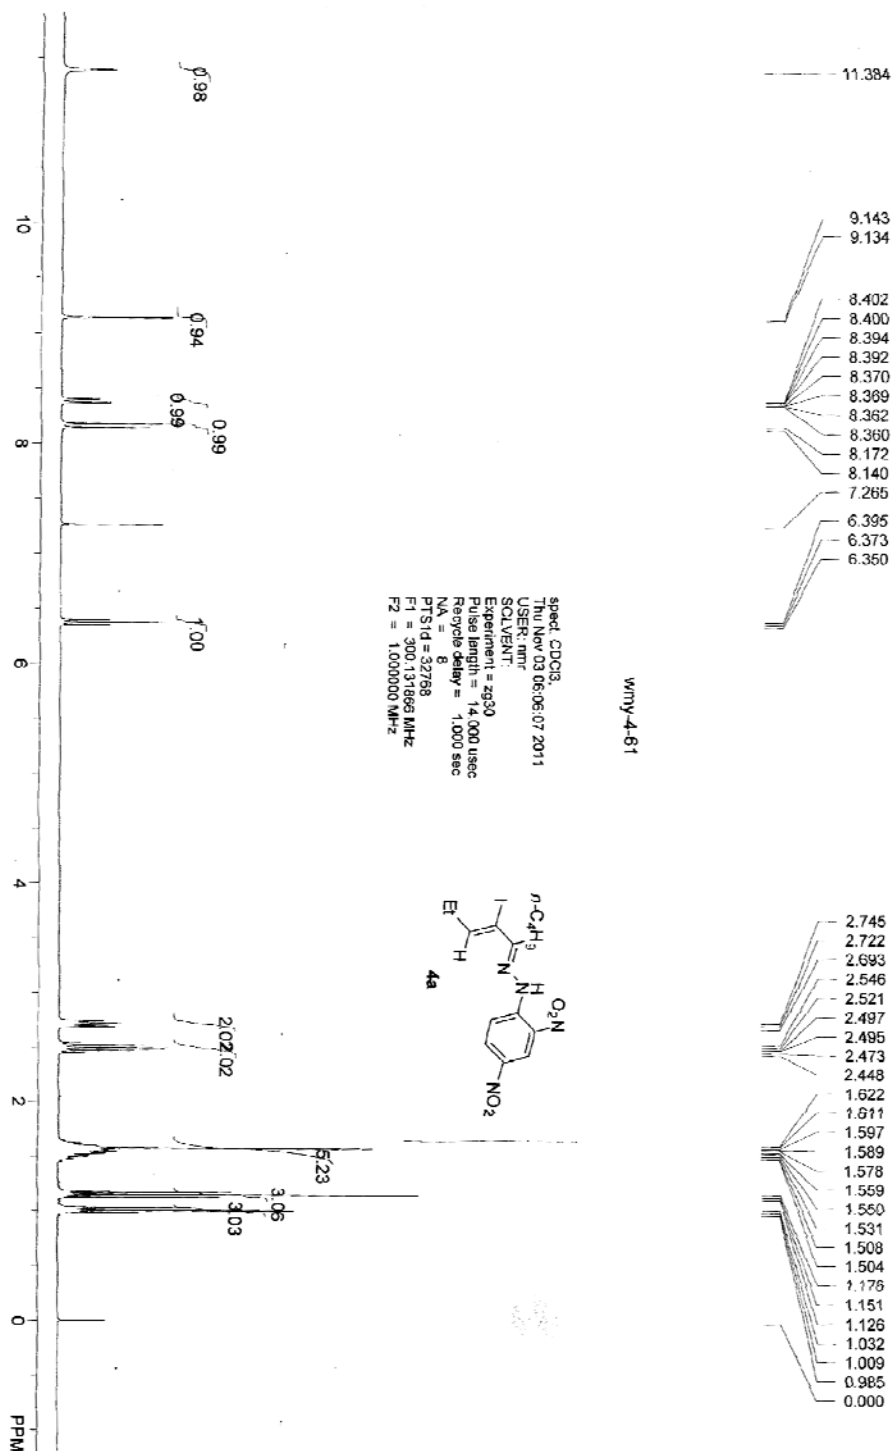

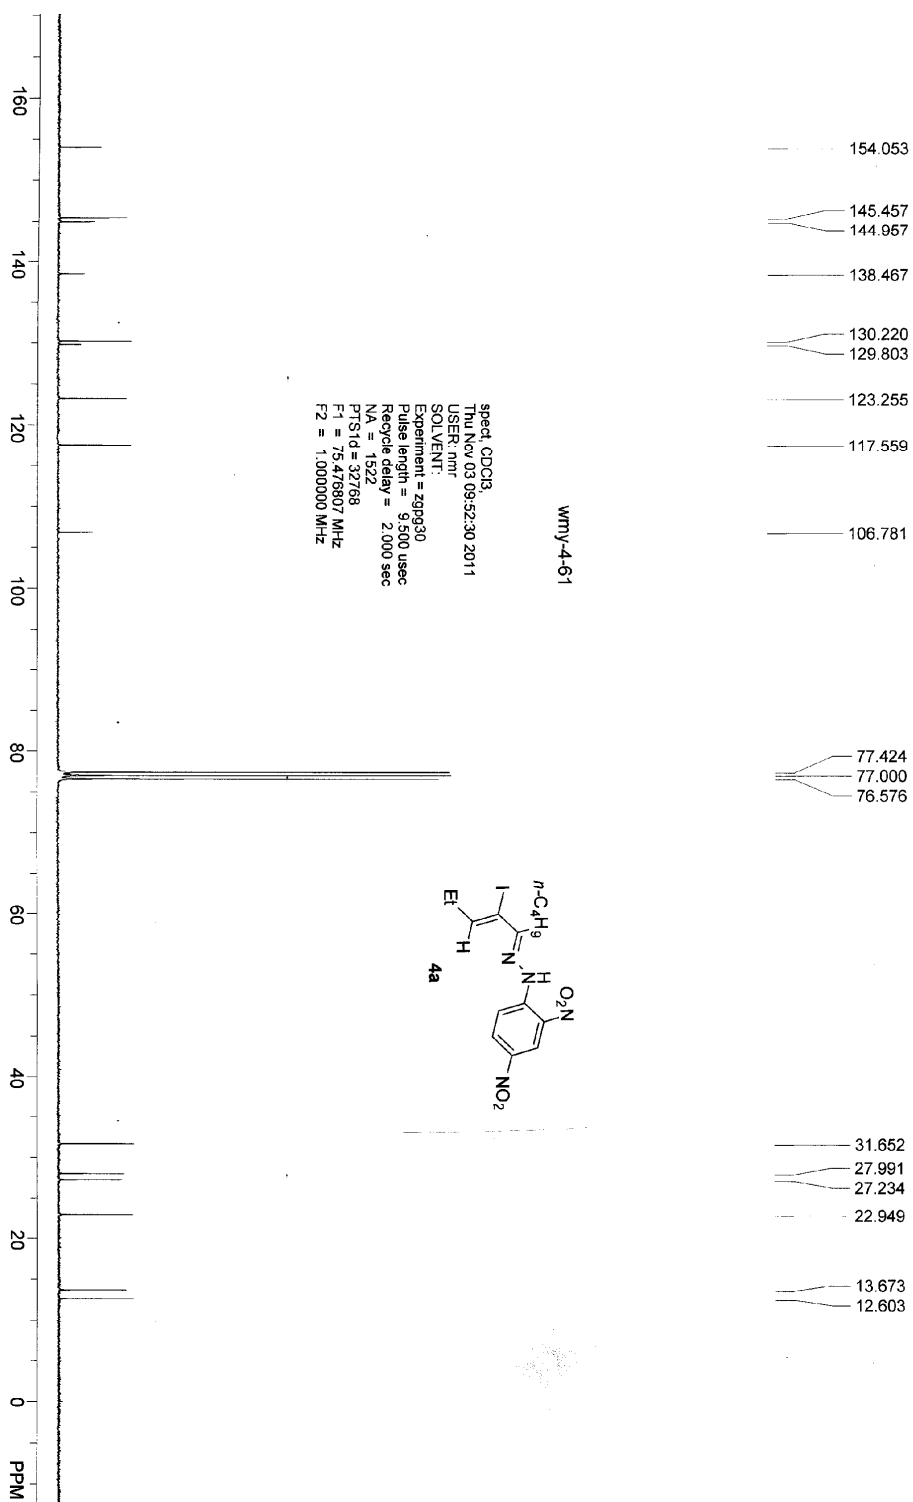

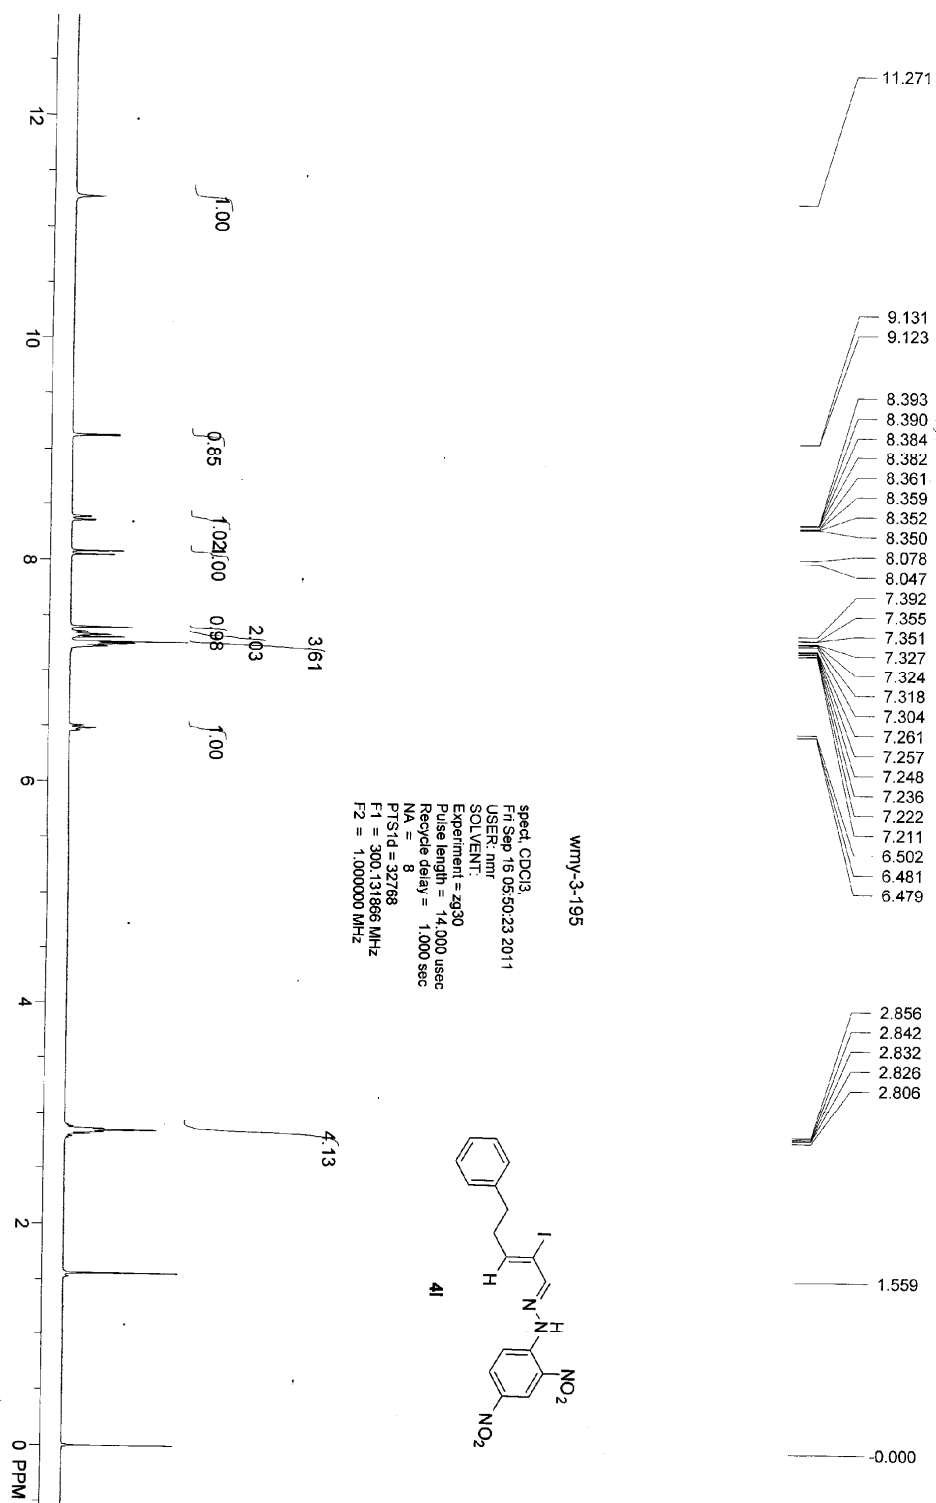

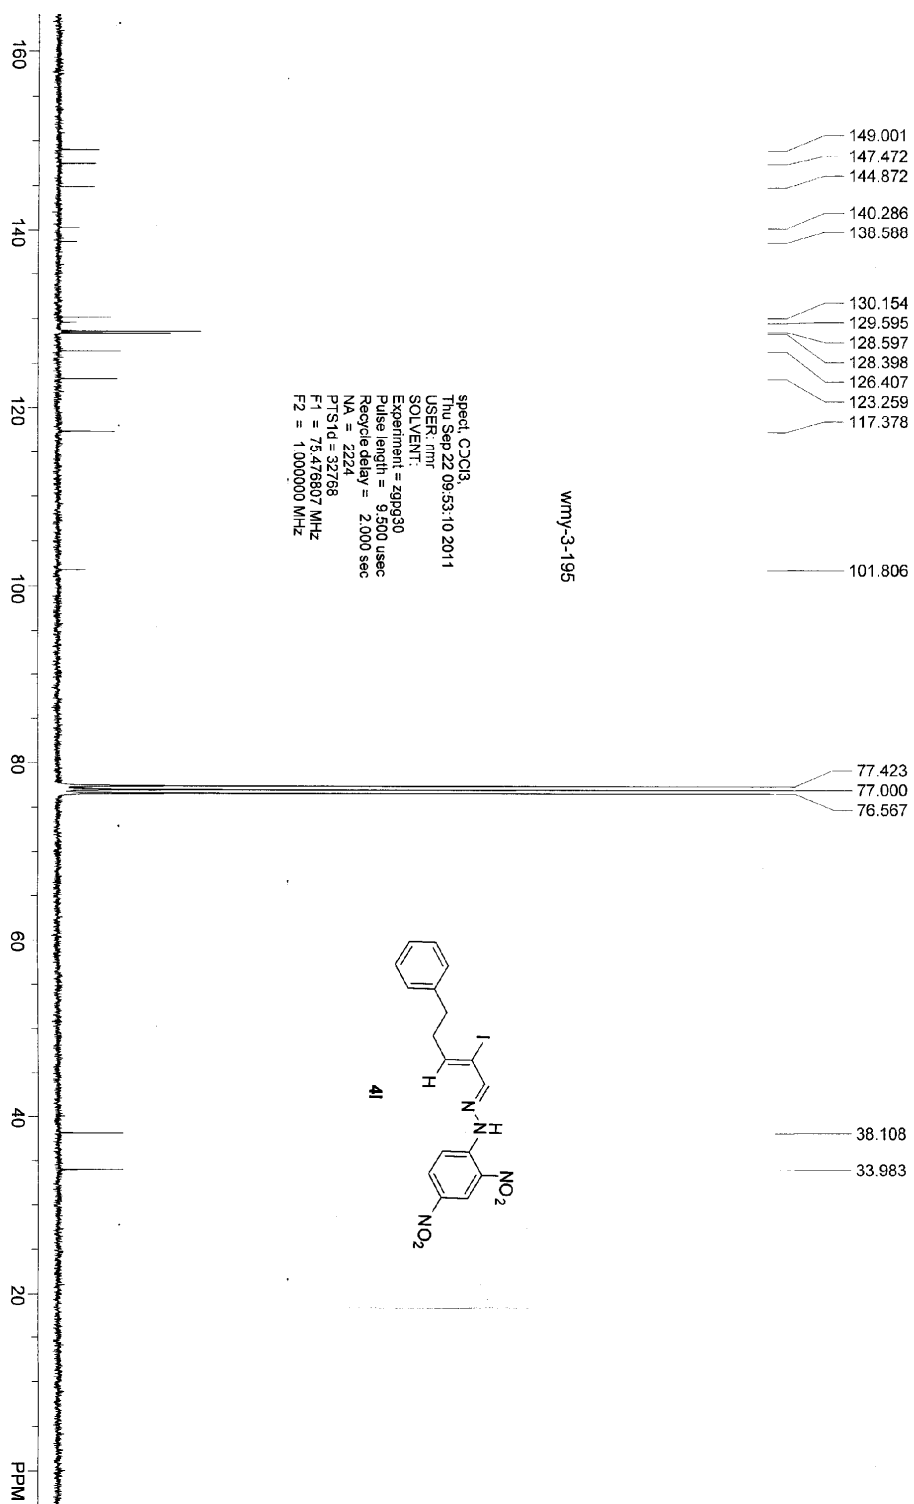



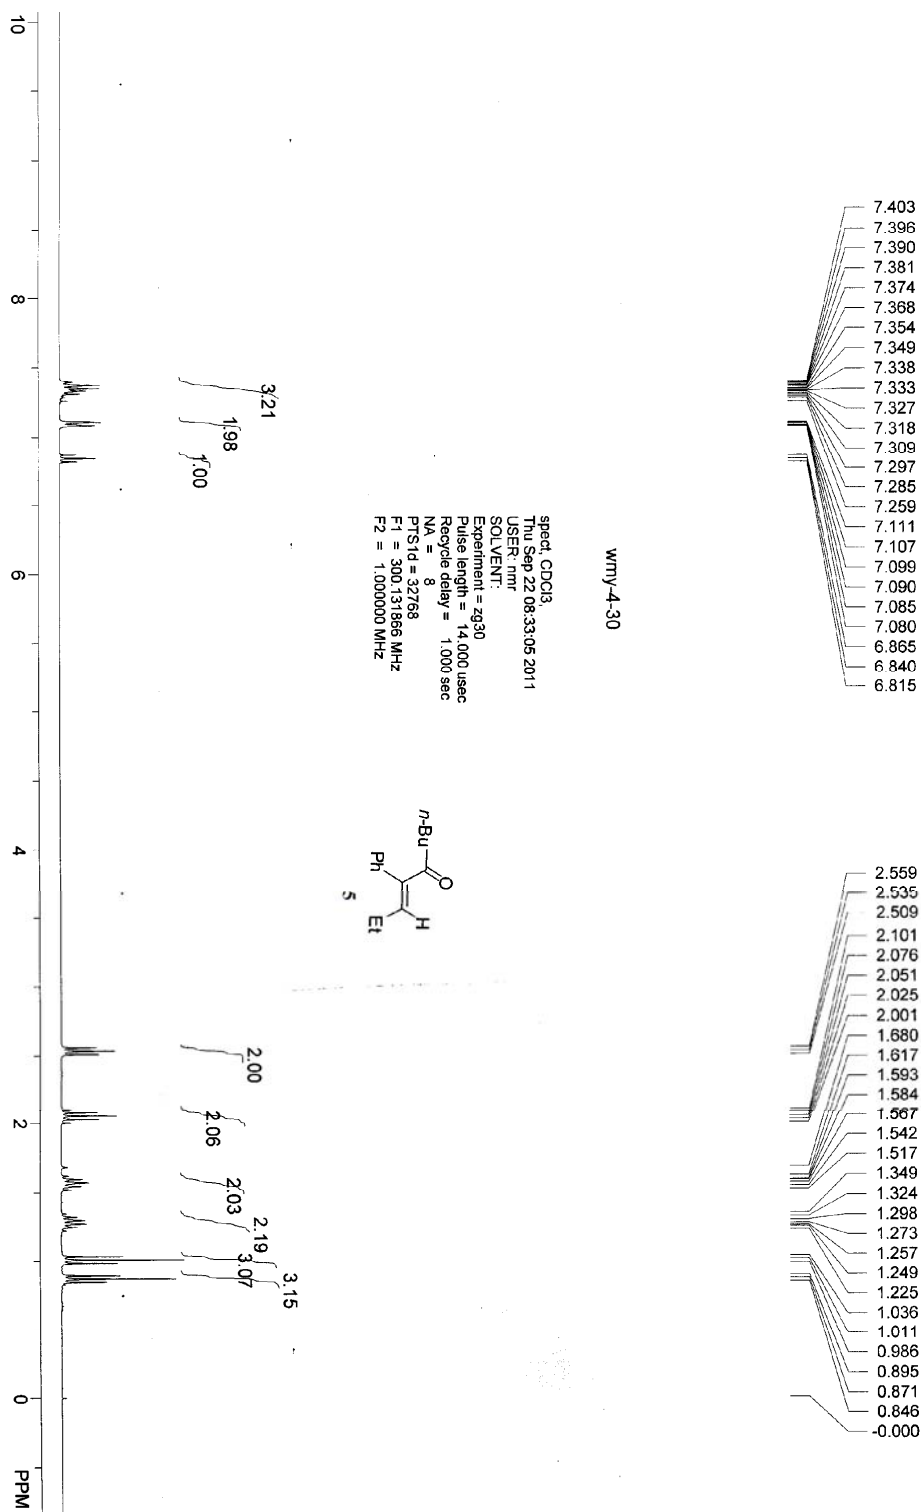

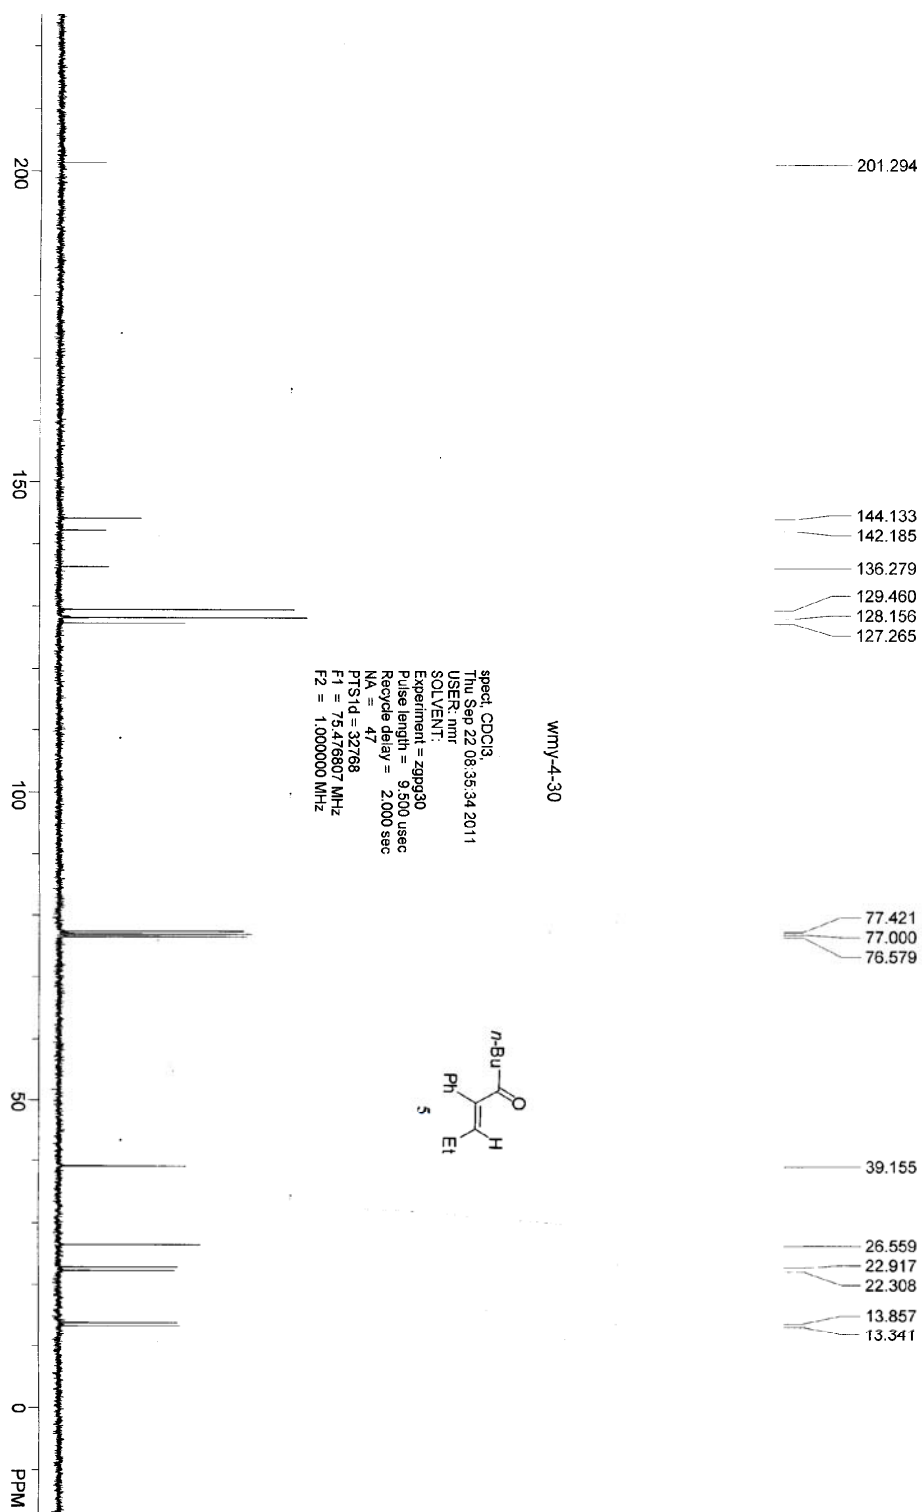

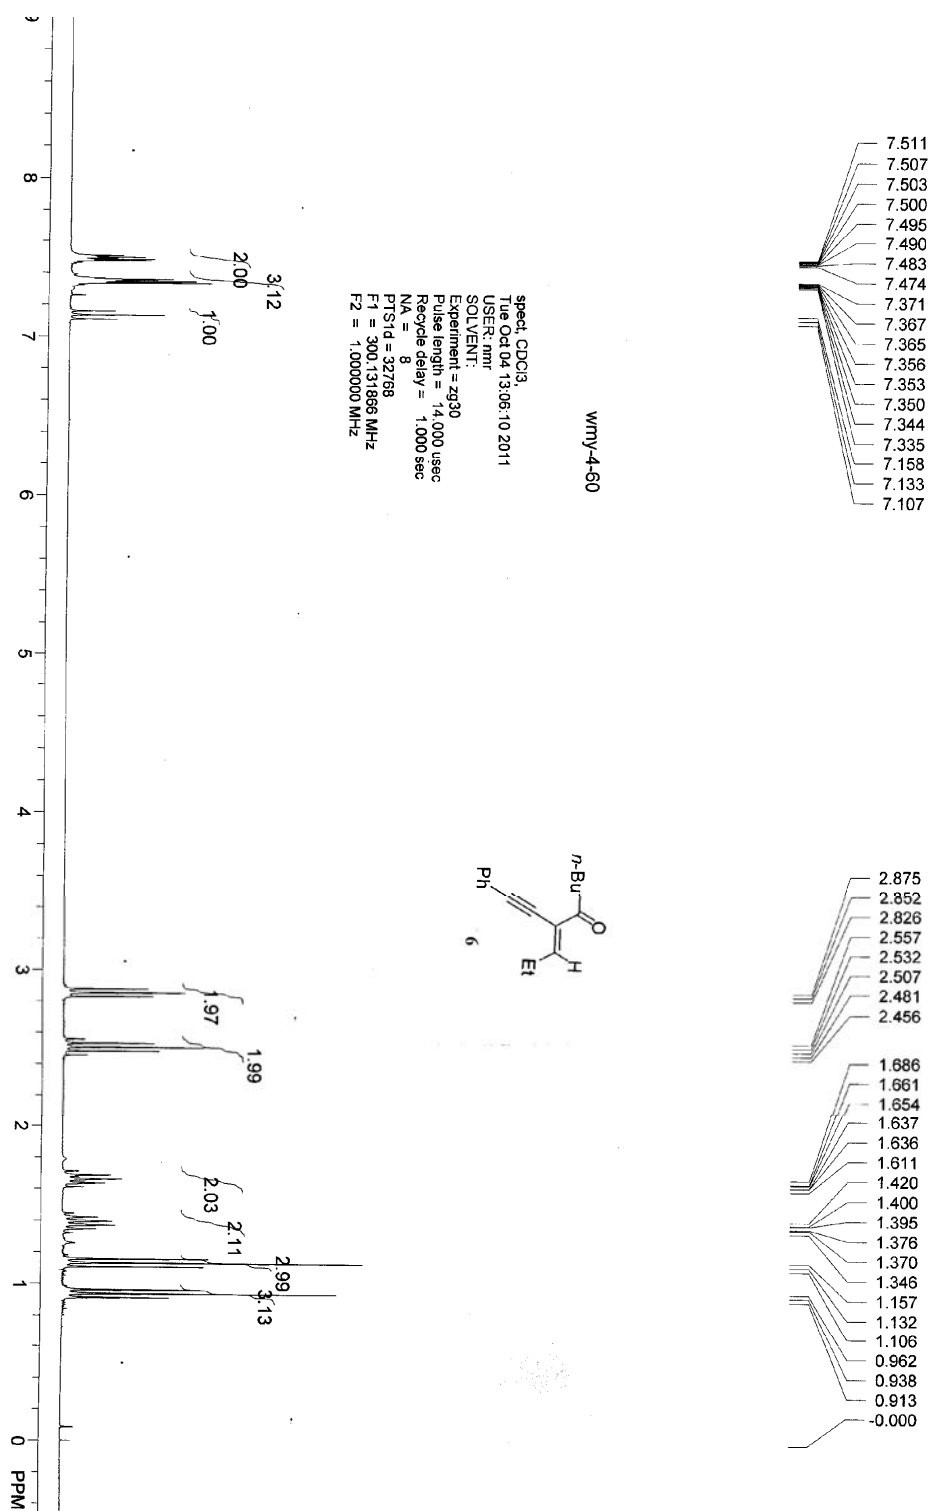

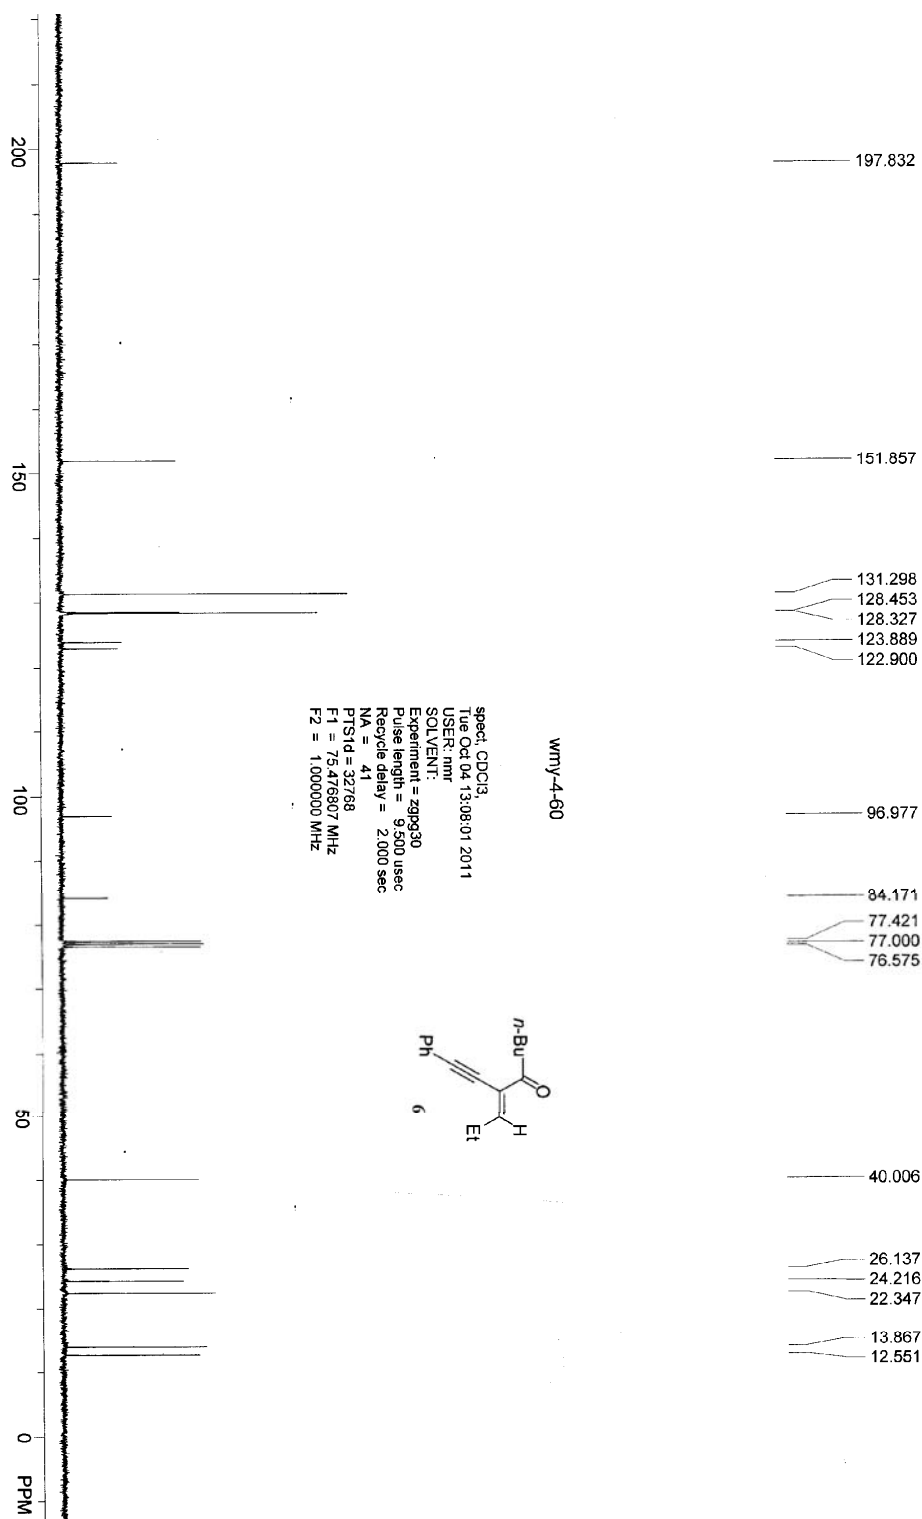

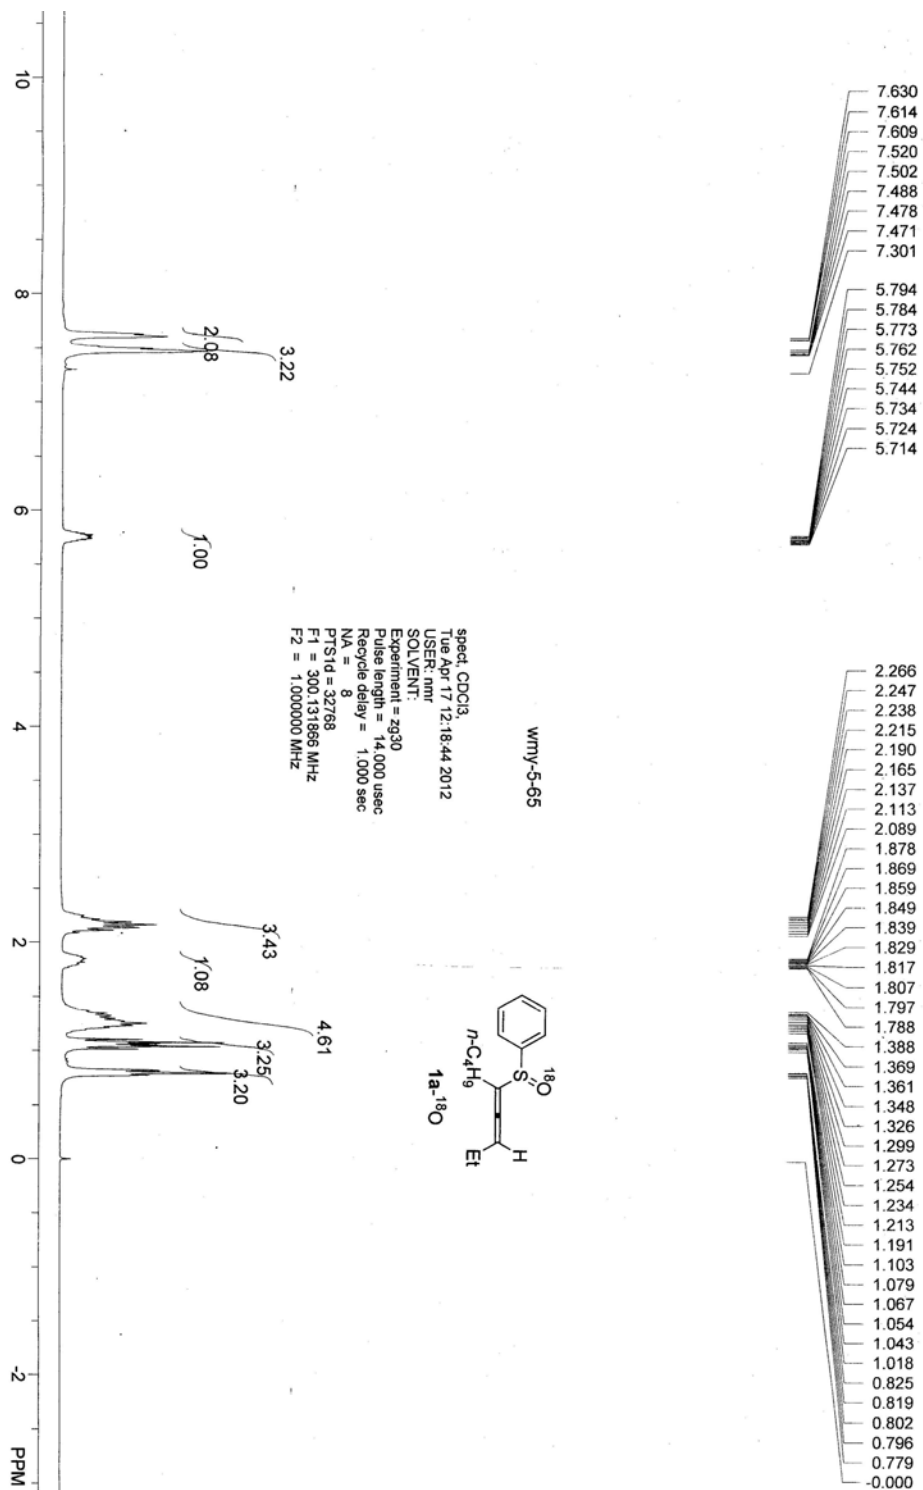

E:\msm\wmy-5-65\_2012-4-6\_2.qgd

Sample Information

Spectrum

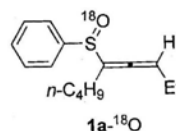

Line#:1 R.Time:6.0(Scan#:1187)

MassPeaks:168

RawMode:Single 6.0(1187) BasePeak:221(230655)

BG Mode:6.6(1367) Group 1 - Event 1

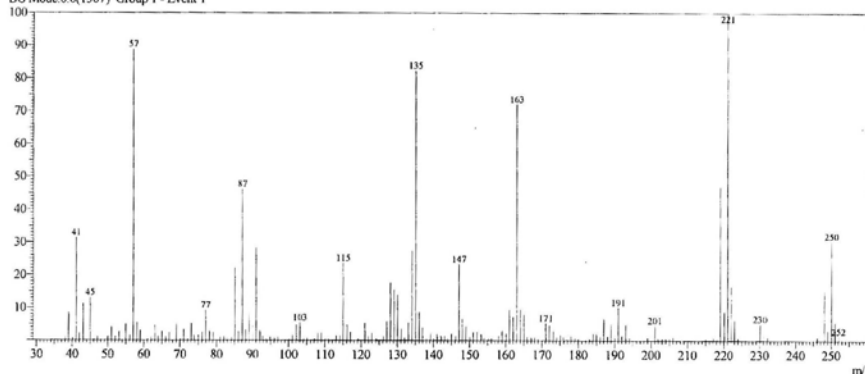

Mass Table

Line#:1 R.Time:6.0(Scan#:1187)

MassPeaks:168

RawMode:Single 6.0(1187) BasePeak:221(230655)

BG Mode:6.6(1367) Group 1 - Event 1

| #  | m/z   | Abs. Int. | Rel. Int. | #  | m/z   | Abs. Int. | Rel. Int. |
|----|-------|-----------|-----------|----|-------|-----------|-----------|
| 1  | 38.10 | 2151      | 0.93      | 25 | 66.05 | 2385      | 1.03      |
| 2  | 39.05 | 19938     | 8.64      | 26 | 67.00 | 5548      | 2.41      |
| 3  | 40.10 | 1678      | 0.73      | 27 | 69.00 | 11315     | 4.91      |
| 4  | 41.10 | 72418     | 31.40     | 28 | 70.10 | 1289      | 0.56      |
| 5  | 42.05 | 5125      | 2.22      | 29 | 71.05 | 8006      | 3.47      |
| 6  | 43.05 | 25913     | 11.23     | 30 | 72.10 | 1135      | 0.49      |
| 7  | 44.00 | 458       | 0.20      | 31 | 73.10 | 11880     | 5.15      |
| 8  | 45.00 | 30271     | 13.12     | 32 | 73.85 | 3791      | 1.64      |
| 9  | 46.05 | 1053      | 0.46      | 33 | 75.00 | 3711      | 1.61      |
| 10 | 47.10 | 2791      | 1.21      | 34 | 76.05 | 5822      | 2.52      |
| 11 | 50.00 | 2929      | 1.27      | 35 | 77.05 | 21291     | 9.23      |
| 12 | 51.05 | 9501      | 4.12      | 36 | 78.05 | 6472      | 2.81      |
| 13 | 52.05 | 2962      | 1.28      | 37 | 79.10 | 5572      | 2.42      |
| 14 | 53.15 | 6353      | 2.75      | 38 | 81.00 | 2218      | 0.96      |
| 15 | 55.00 | 11717     | 5.08      | 39 | 82.05 | 2959      | 1.28      |
| 16 | 56.15 | 3842      | 1.67      | 40 | 82.90 | 1622      | 0.70      |
| 17 | 57.10 | 204816    | 88.80     | 41 | 84.10 | 1849      | 0.80      |
| 18 | 58.10 | 12657     | 5.49      | 42 | 85.10 | 51466     | 22.31     |
| 19 | 59.00 | 7102      | 3.08      | 43 | 86.05 | 6090      | 2.64      |
| 20 | 61.05 | 1047      | 0.45      | 44 | 87.10 | 106495    | 46.17     |
| 21 | 62.05 | 2089      | 0.91      | 45 | 88.05 | 7830      | 3.39      |
| 22 | 63.05 | 10591     | 4.59      | 46 | 89.00 | 20140     | 8.73      |
| 23 | 64.00 | 2748      | 1.19      | 47 | 90.05 | 10535     | 4.57      |
| 24 | 65.05 | 6274      | 2.72      | 48 | 91.05 | 65254     | 28.29     |

| #   | m/z    | Abs. Int. | Rel. Int. | #   | m/z           | Abs. Int. | Rel. Int. |
|-----|--------|-----------|-----------|-----|---------------|-----------|-----------|
| 49  | 92.05  | 7037      | 3.05      | 106 | 155.20        | 1682      | 0.73      |
| 50  | 92.80  | 3062      | 1.33      | 107 | 156.10        | 1460      | 0.63      |
| 51  | 93.85  | 1158      | 0.50      | 108 | 158.05        | 3426      | 1.49      |
| 52  | 94.90  | 2663      | 1.15      | 109 | 159.00        | 7126      | 3.09      |
| 53  | 96.05  | 1743      | 0.76      | 110 | 160.10        | 5026      | 2.18      |
| 54  | 97.05  | 2673      | 1.16      | 111 | 161.05        | 21761     | 9.43      |
| 55  | 99.15  | 438       | 0.19      | 112 | 162.10        | 16521     | 7.16      |
| 56  | 100.10 | 1135      | 0.49      | 113 | 163.05        | 166187    | 72.05     |
| 57  | 101.05 | 3509      | 1.52      | 114 | 164.10        | 21974     | 9.53      |
| 58  | 102.05 | 11092     | 4.81      | 115 | 165.05        | 18209     | 7.89      |
| 59  | 103.10 | 12632     | 5.48      | 116 | 165.95        | 2428      | 1.05      |
| 60  | 104.15 | 1368      | 0.59      | 117 | 167.10        | 2098      | 0.91      |
| 61  | 105.10 | 1740      | 0.75      | 118 | 168.00        | 2297      | 1.00      |
| 62  | 107.05 | 1043      | 0.45      | 119 | 169.00        | 1162      | 0.50      |
| 63  | 108.00 | 5351      | 2.32      | 120 | 171.05        | 12255     | 5.31      |
| 64  | 109.05 | 5416      | 2.35      | 121 | 172.05        | 10970     | 4.76      |
| 65  | 110.05 | 1351      | 0.59      | 122 | 173.10        | 7151      | 3.10      |
| 66  | 110.95 | 1202      | 0.52      | 123 | 174.05        | 2384      | 1.03      |
| 67  | 113.15 | 3486      | 1.51      | 124 | 175.10        | 4140      | 1.79      |
| 68  | 114.10 | 3663      | 1.59      | 125 | 175.90        | 2390      | 1.04      |
| 69  | 115.05 | 54617     | 23.68     | 126 | 176.95        | 3146      | 1.36      |
| 70  | 116.10 | 11231     | 4.87      | 127 | 178.05        | 3260      | 1.41      |
| 71  | 117.05 | 6151      | 2.67      | 128 | 179.10        | 1817      | 0.79      |
| 72  | 119.10 | 1254      | 0.54      | 129 | 180.00        | 1078      | 0.47      |
| 73  | 121.00 | 12289     | 5.33      | 130 | 183.10        | 1188      | 0.52      |
| 74  | 122.00 | 2799      | 1.21      | 131 | 184.10        | 5097      | 2.21      |
| 75  | 123.00 | 5359      | 2.32      | 132 | 184.95        | 4875      | 2.11      |
| 76  | 124.20 | 1153      | 0.50      | 133 | 186.05        | 2616      | 1.13      |
| 77  | 126.15 | 2894      | 1.25      | 134 | 187.05        | 15263     | 6.62      |
| 78  | 127.10 | 13484     | 5.85      | 135 | 188.05        | 3022      | 1.31      |
| 79  | 128.10 | 40850     | 17.71     | 136 | 189.00        | 11999     | 5.20      |
| 80  | 129.10 | 35886     | 15.56     | 137 | 190.05        | 2718      | 1.18      |
| 81  | 130.10 | 32222     | 13.97     | 138 | 191.00        | 23254     | 10.08     |
| 82  | 131.10 | 8414      | 3.65      | 139 | 192.00        | 3372      | 1.46      |
| 83  | 132.05 | 1809      | 0.78      | 140 | 193.05        | 11455     | 4.97      |
| 84  | 133.05 | 12614     | 5.47      | 141 | 194.05        | 2080      | 0.90      |
| 85  | 134.05 | 63581     | 27.57     | 142 | 199.00        | 2108      | 0.91      |
| 86  | 135.10 | 189876    | 82.32     | 143 | 201.05        | 10621     | 4.60      |
| 87  | 136.05 | 20092     | 8.71      | 144 | 201.90        | 1596      | 0.69      |
| 88  | 137.00 | 9234      | 4.00      | 145 | 203.00        | 1423      | 0.62      |
| 89  | 138.10 | 1263      | 0.55      | 146 | 204.00        | 1470      | 0.64      |
| 90  | 139.10 | 5103      | 2.21      | 147 | 205.00        | 1546      | 0.67      |
| 91  | 140.05 | 1323      | 0.57      | 148 | 205.95        | 2640      | 1.14      |
| 92  | 141.00 | 4599      | 1.99      | 149 | 207.05        | 238       | 0.10      |
| 93  | 142.10 | 3185      | 1.38      | 150 | 208.00        | 80        | 0.03      |
| 94  | 143.10 | 3226      | 1.40      | 151 | 215.00        | 1102      | 0.48      |
| 95  | 144.05 | 1543      | 0.67      | 152 | 217.15        | 1953      | 0.85      |
| 96  | 145.00 | 4942      | 2.14      | 153 | 218.05        | 1358      | 0.59      |
| 97  | 146.15 | 3274      | 1.42      | 154 | <u>219.05</u> | 108261    | 46.94     |
| 98  | 147.05 | 53878     | 23.36     | 155 | <u>220.05</u> | 20638     | 8.95      |
| 99  | 148.00 | 15172     | 6.58      | 156 | <u>221.05</u> | 230655    | 100.00    |
| 100 | 149.05 | 9950      | 4.31      | 157 | 222.00        | 38194     | 16.56     |
| 101 | 150.15 | 2605      | 1.13      | 158 | 223.00        | 14209     | 6.16      |
| 102 | 151.05 | 5952      | 2.58      | 159 | 224.00        | 1844      | 0.80      |
| 103 | 152.05 | 6198      | 2.69      | 160 | 230.10        | 11598     | 5.03      |
| 104 | 153.20 | 4924      | 2.13      | 161 | 231.10        | 3252      | 1.41      |
| 105 | 154.00 | 2022      | 0.88      | 162 | 232.20        | 2740      | 1.19      |

| #   | m/z    | Abs. Int. | Rel. Int. | #   | m/z    | Abs. Int. | Rel. Int. |
|-----|--------|-----------|-----------|-----|--------|-----------|-----------|
| 163 | 246.10 | 2492      | 1.08      | 166 | 250.10 | 70249     | 30.46     |
| 164 | 248.10 | 34866     | 15.12     | 167 | 251.10 | 13151     | 5.70      |
| 165 | 249.10 | 7194      | 3.12      | 168 | 252.05 | 3286      | 1.42      |

The relative abundances of 221 [M (<sup>18</sup>O)-Et]<sup>+</sup>, 219 [M (<sup>16</sup>O)-Et]<sup>+</sup> are 100, 46.94.

$$(100-46.94*4.5\%)/(100-46.94*4.5\%+46.94)=67.59\%$$

|                                                                                                                                                                                                                                                                                                                                                                                                                                                                          |
|--------------------------------------------------------------------------------------------------------------------------------------------------------------------------------------------------------------------------------------------------------------------------------------------------------------------------------------------------------------------------------------------------------------------------------------------------------------------------|
| <p style="text-align: center;"><math>C_{13}H_{15}S^{16}O</math></p> <p style="text-align: center;">Chemical Formula: <math>C_{13}H_{15}^{16}OS</math></p> <p style="text-align: center;">Exact Mass: 219.0844</p> <p style="text-align: center;">Molecular Weight: 219.3181</p> <p style="text-align: center;">m/z: 219.0844 (100.0%), 220.0877 (14.1%), 221.0802 (4.5%)</p> <p style="text-align: center;">Elemental Analysis: C, 71.19; H, 6.89; O, 7.29; S, 14.62</p> |
| <p style="text-align: center;"><math>C_{13}H_{15}S^{18}O</math></p> <p style="text-align: center;">Chemical Formula: <math>C_{13}H_{15}^{18}OS</math></p> <p style="text-align: center;">Exact Mass: 221.0886</p> <p style="text-align: center;">Molecular Weight: 221.3224</p> <p style="text-align: center;">m/z: 221.0886 (100.0%), 222.0920 (14.1%), 223.0844 (4.5%)</p> <p style="text-align: center;">Elemental Analysis: C, 70.55; H, 6.83; O, 8.13; S, 14.49</p> |



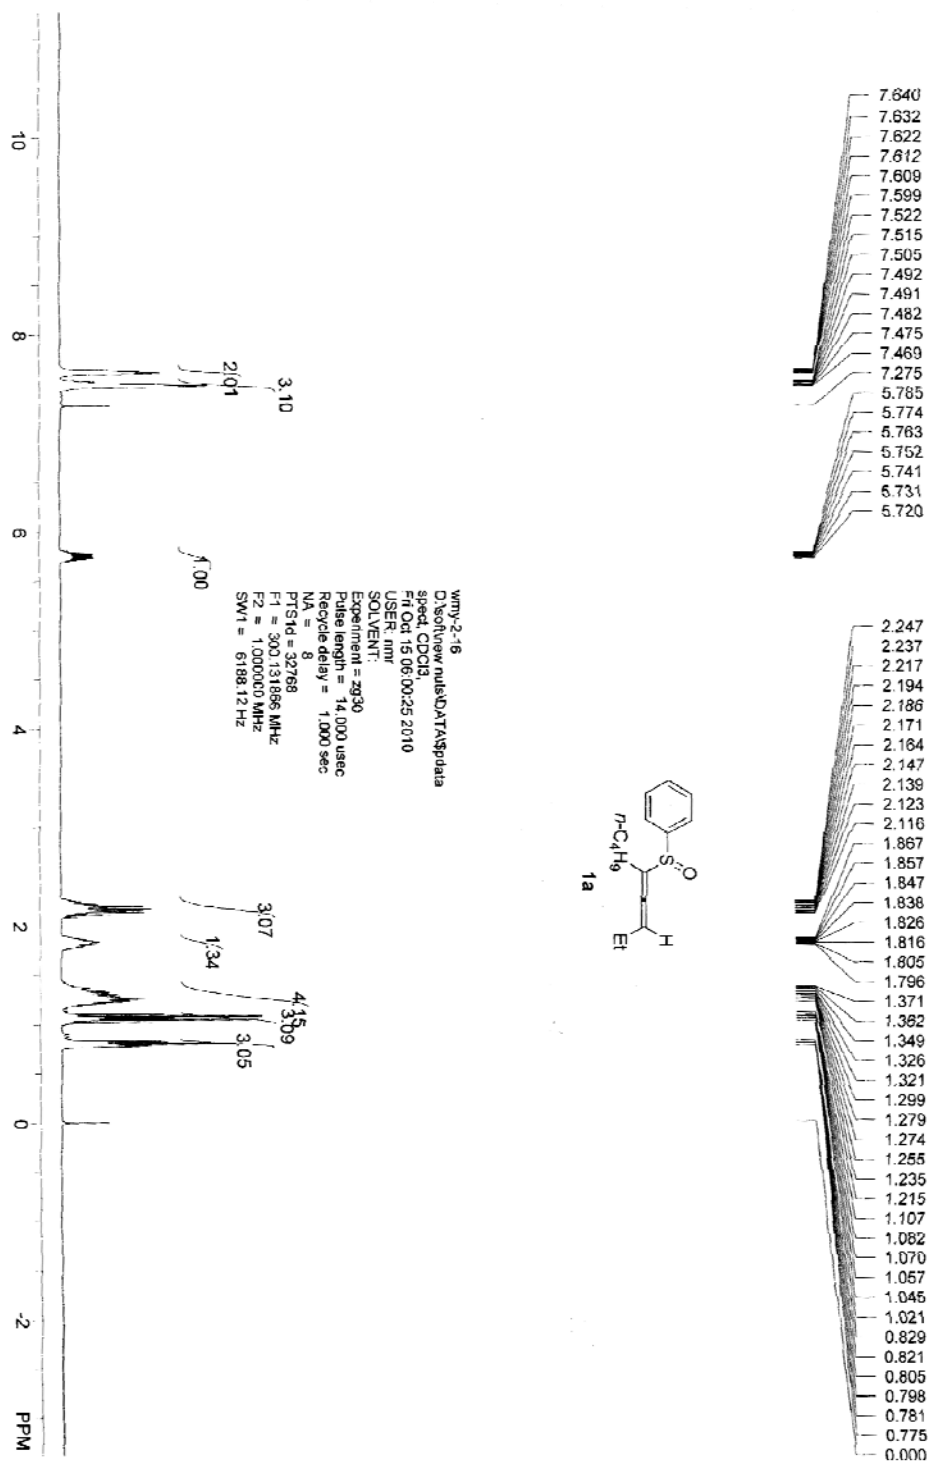

H:\msm\wmy-16.qgd  
 H:\zju\zj.qgr

Sample Information

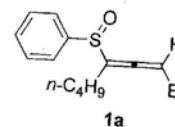

Spectrum

Line#:1 R.Time:7.5(Scan#:1665)  
 MassPeaks:111  
 RawMode:Single 7.5(1665) BasePeak:135(78737)  
 BG Mode:7.6(1693) Group 1 - Event 1

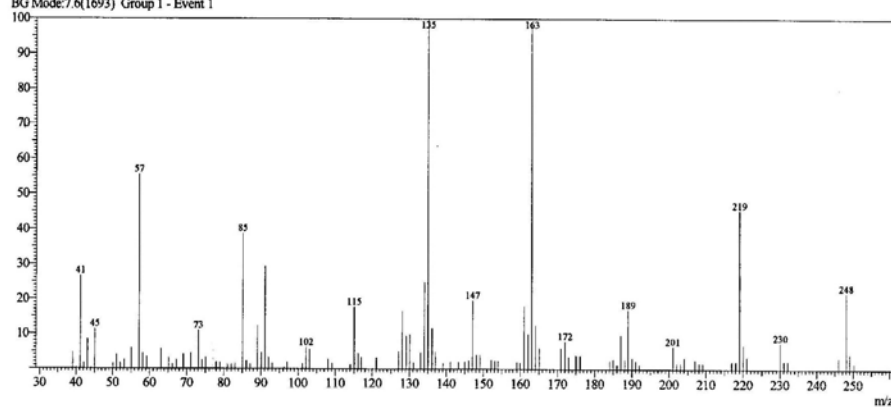

Mass Table

Line#:1 R.Time:7.5(Scan#:1665)  
 MassPeaks:111  
 RawMode:Single 7.5(1665) BasePeak:135(78737)  
 BG Mode:7.6(1693) Group 1 - Event 1

| #  | m/z   | Abs. Int. | Rel. Int. | #  | m/z    | Abs. Int. | Rel. Int. |
|----|-------|-----------|-----------|----|--------|-----------|-----------|
| 1  | 39.15 | 3647      | 4.63      | 25 | 77.05  | 5758      | 7.31      |
| 2  | 40.10 | 307       | 0.39      | 26 | 78.00  | 1506      | 1.91      |
| 3  | 41.15 | 20983     | 26.65     | 27 | 79.00  | 1430      | 1.82      |
| 4  | 42.15 | 1255      | 1.59      | 28 | 81.05  | 1090      | 1.38      |
| 5  | 43.15 | 6618      | 8.41      | 29 | 82.10  | 1046      | 1.33      |
| 6  | 44.10 | 205       | 0.26      | 30 | 83.05  | 1252      | 1.59      |
| 7  | 45.15 | 8994      | 11.42     | 31 | 85.10  | 30605     | 38.87     |
| 8  | 50.10 | 1212      | 1.54      | 32 | 86.10  | 1839      | 2.34      |
| 9  | 51.10 | 3222      | 4.09      | 33 | 87.05  | 1155      | 1.47      |
| 10 | 52.05 | 1299      | 1.65      | 34 | 89.05  | 9720      | 12.34     |
| 11 | 53.15 | 2007      | 2.55      | 35 | 90.10  | 3631      | 4.61      |
| 12 | 55.10 | 4736      | 6.01      | 36 | 91.10  | 23181     | 29.44     |
| 13 | 57.15 | 43742     | 55.55     | 37 | 92.05  | 2618      | 3.32      |
| 14 | 58.10 | 3401      | 4.32      | 38 | 93.00  | 1302      | 1.65      |
| 15 | 59.20 | 2735      | 3.47      | 39 | 96.20  | 384       | 0.49      |
| 16 | 63.05 | 4524      | 5.75      | 40 | 97.05  | 1505      | 1.91      |
| 17 | 65.15 | 2524      | 3.21      | 41 | 101.15 | 1150      | 1.46      |
| 18 | 66.20 | 1046      | 1.33      | 42 | 102.10 | 4847      | 6.16      |
| 19 | 67.15 | 2101      | 2.67      | 43 | 103.05 | 4494      | 5.71      |
| 20 | 69.05 | 3313      | 4.21      | 44 | 108.00 | 2185      | 2.78      |
| 21 | 71.10 | 3657      | 4.64      | 45 | 109.10 | 1340      | 1.70      |
| 22 | 73.10 | 8638      | 10.97     | 46 | 114.05 | 1040      | 1.32      |
| 23 | 74.10 | 1993      | 2.53      | 47 | 115.10 | 13989     | 17.77     |
| 24 | 75.05 | 2671      | 3.39      | 48 | 116.15 | 3585      | 4.55      |

| #  | m/z    | Abs. Int. | Rel. Int. | #   | m/z    | Abs. Int. | Rel. Int. |
|----|--------|-----------|-----------|-----|--------|-----------|-----------|
| 49 | 117.00 | 2646      | 3.36      | 81  | 173.00 | 2876      | 3.65      |
| 50 | 121.10 | 2596      | 3.25      | 82  | 174.95 | 3229      | 4.10      |
| 51 | 127.10 | 3913      | 4.97      | 83  | 176.05 | 3123      | 3.97      |
| 52 | 128.10 | 13116     | 16.66     | 84  | 184.05 | 2013      | 2.56      |
| 53 | 129.10 | 7420      | 9.42      | 85  | 185.00 | 2326      | 2.95      |
| 54 | 130.10 | 7855      | 9.98      | 86  | 186.00 | 1046      | 1.33      |
| 55 | 131.10 | 1459      | 1.85      | 87  | 187.05 | 7674      | 9.75      |
| 56 | 133.05 | 3721      | 4.73      | 88  | 188.05 | 2192      | 2.78      |
| 57 | 134.05 | 19661     | 24.97     | 89  | 189.00 | 13414     | 17.04     |
| 58 | 135.05 | 78737     | 100.00    | 90  | 190.10 | 2505      | 3.18      |
| 59 | 136.10 | 9250      | 11.75     | 91  | 191.05 | 1856      | 2.36      |
| 60 | 137.05 | 3883      | 4.93      | 92  | 192.00 | 1046      | 1.33      |
| 61 | 139.05 | 1361      | 1.73      | 93  | 201.00 | 5142      | 6.53      |
| 62 | 141.15 | 1658      | 2.11      | 94  | 202.00 | 1442      | 1.83      |
| 63 | 143.30 | 1596      | 2.03      | 95  | 203.05 | 1343      | 1.71      |
| 64 | 145.00 | 1660      | 2.11      | 96  | 204.05 | 2627      | 3.34      |
| 65 | 146.05 | 2009      | 2.55      | 97  | 206.95 | 2075      | 2.64      |
| 66 | 147.10 | 15542     | 19.74     | 98  | 208.05 | 1334      | 1.69      |
| 67 | 148.15 | 3293      | 4.18      | 99  | 209.00 | 1340      | 1.70      |
| 68 | 149.05 | 3191      | 4.05      | 100 | 216.95 | 1882      | 2.39      |
| 69 | 152.15 | 2160      | 2.74      | 101 | 218.05 | 1752      | 2.23      |
| 70 | 153.15 | 1847      | 2.35      | 102 | 219.00 | 35776     | 45.44     |
| 71 | 153.90 | 1916      | 2.43      | 103 | 220.05 | 5428      | 6.89      |
| 72 | 159.10 | 1596      | 2.03      | 104 | 221.05 | 2876      | 3.65      |
| 73 | 159.90 | 1506      | 1.91      | 105 | 230.10 | 5999      | 7.62      |
| 74 | 161.05 | 14187     | 18.02     | 106 | 231.10 | 1801      | 2.29      |
| 75 | 162.15 | 7965      | 10.12     | 107 | 232.15 | 1869      | 2.37      |
| 76 | 163.05 | 77181     | 98.02     | 108 | 246.00 | 2633      | 3.34      |
| 77 | 164.10 | 9929      | 12.61     | 109 | 248.10 | 17280     | 21.95     |
| 78 | 165.10 | 4796      | 6.09      | 110 | 249.10 | 3490      | 4.43      |
| 79 | 170.95 | 4774      | 6.06      | 111 | 250.25 | 1379      | 1.75      |
| 80 | 172.05 | 6300      | 8.00      |     |        |           |           |

The relative abundances of 221 [M (<sup>18</sup>O)-Et]<sup>+</sup>, 219 [M (<sup>16</sup>O)-Et]<sup>+</sup> are 3.65, 45.44.

$$(3.65-45.44*4.5\%)/(3.65-45.44*4.5\%+45.44)=3.41\%$$

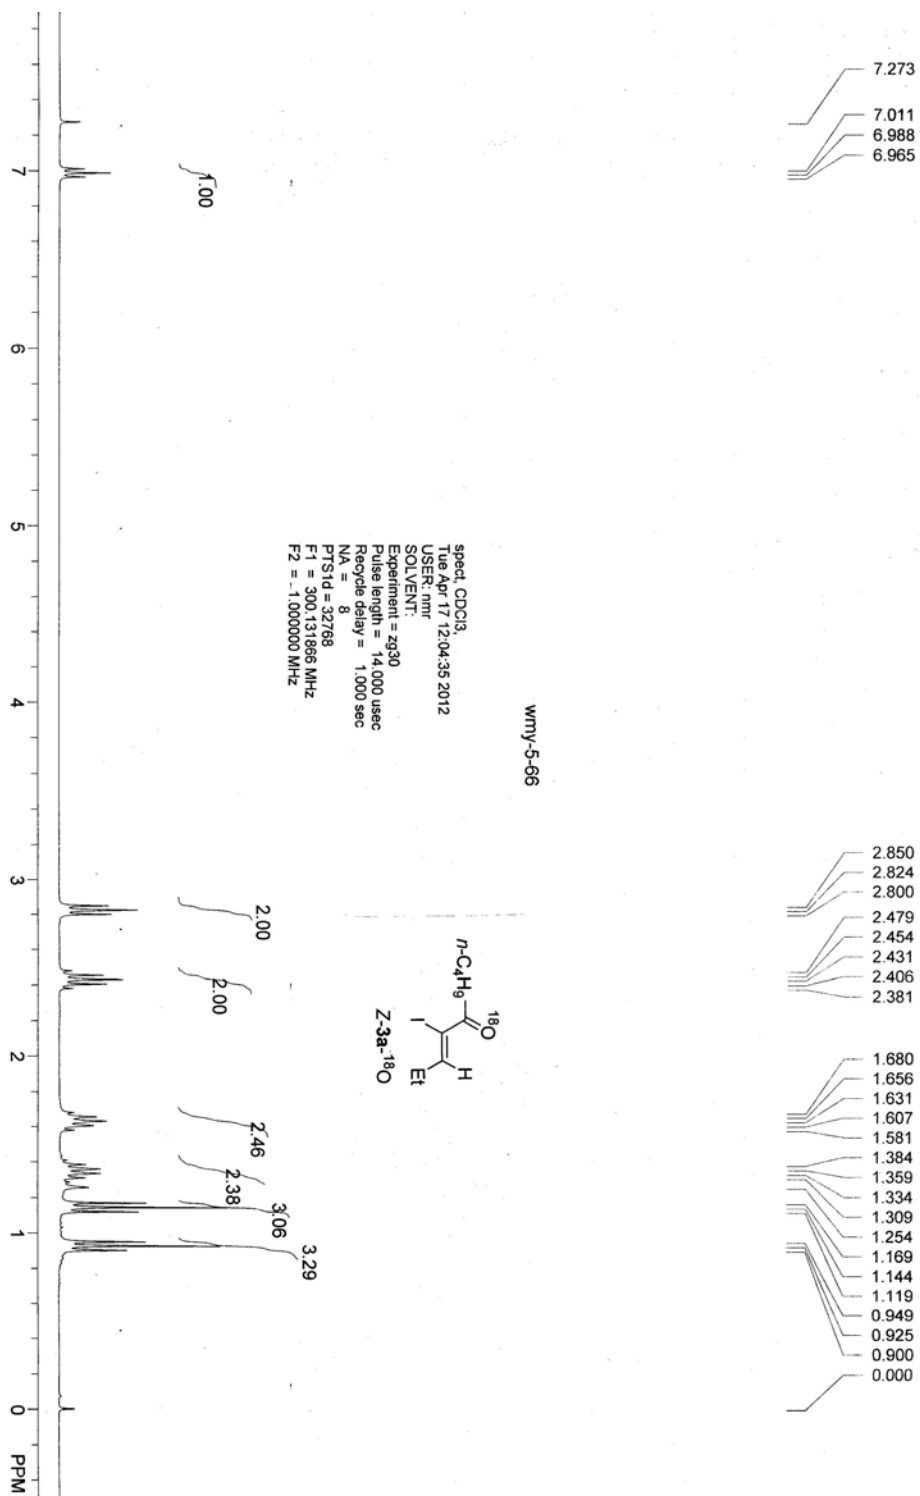

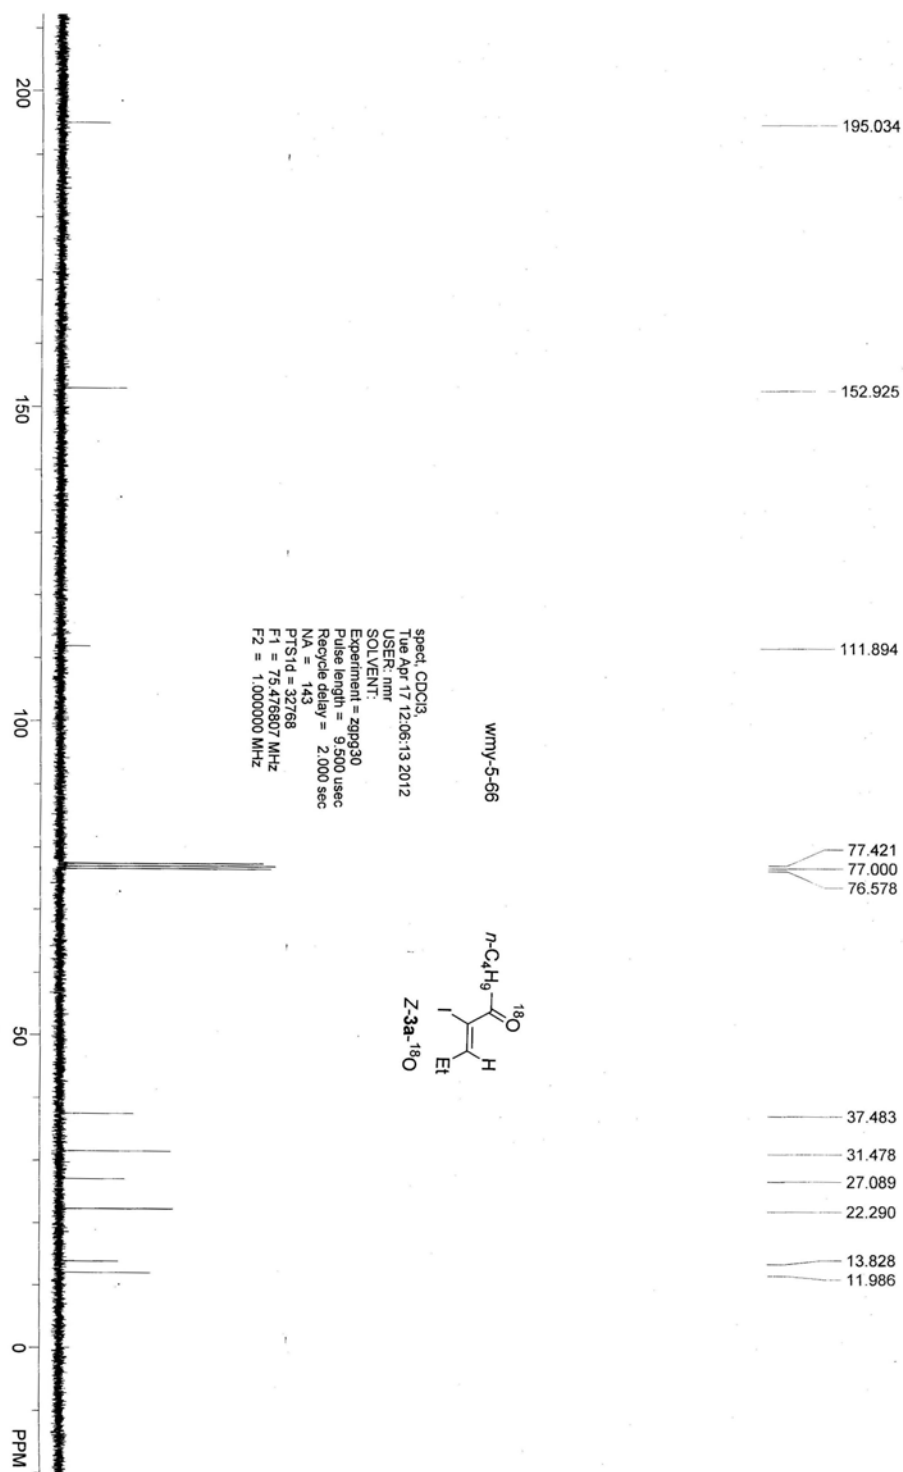

E:\msm\wmy-5-66\_2012-4-6\_3.qgd

Sample Information

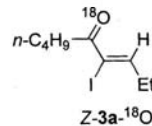

Spectrum

Line#:1 R.Time:4.5(Scan#:757)  
 MassPeaks:156  
 RawMode:Single 4.5(757) BasePeak:53(2678104)  
 BG Mode:4.9(879) Group 1 - Event 1

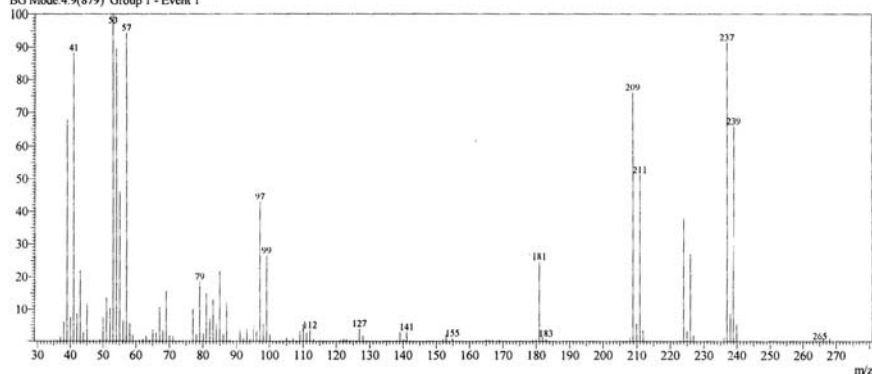

Mass Table

Line#:1 R.Time:4.5(Scan#:757)  
 MassPeaks:156  
 RawMode:Single 4.5(757) BasePeak:53(2678104)  
 BG Mode:4.9(879) Group 1 - Event 1

| #  | m/z   | Abs. Int. | Rel. Int. | #  | m/z   | Abs. Int. | Rel. Int. |
|----|-------|-----------|-----------|----|-------|-----------|-----------|
| 1  | 36.15 | 1674      | 0.06      | 25 | 60.05 | 6521      | 0.24      |
| 2  | 37.05 | 32984     | 1.23      | 26 | 61.05 | 11907     | 0.44      |
| 3  | 38.10 | 158063    | 5.90      | 27 | 62.00 | 21198     | 0.79      |
| 4  | 39.05 | 1813495   | 67.72     | 28 | 63.05 | 44368     | 1.66      |
| 5  | 40.10 | 195874    | 7.31      | 29 | 64.05 | 11770     | 0.44      |
| 6  | 41.05 | 2364334   | 88.28     | 30 | 65.05 | 94443     | 3.53      |
| 7  | 42.05 | 230797    | 8.62      | 31 | 66.05 | 71268     | 2.66      |
| 8  | 43.05 | 590276    | 22.04     | 32 | 67.05 | 288166    | 10.76     |
| 9  | 44.05 | 73685     | 2.75      | 33 | 68.05 | 94629     | 3.53      |
| 10 | 45.05 | 316291    | 11.81     | 34 | 69.05 | 419786    | 15.67     |
| 11 | 46.00 | 7903      | 0.30      | 35 | 70.05 | 45490     | 1.70      |
| 12 | 47.05 | 9311      | 0.35      | 36 | 71.05 | 44774     | 1.67      |
| 13 | 48.05 | 1585      | 0.06      | 37 | 72.10 | 5300      | 0.20      |
| 14 | 49.00 | 17118     | 0.64      | 38 | 73.05 | 7728      | 0.29      |
| 15 | 50.00 | 195218    | 7.29      | 39 | 74.05 | 9095      | 0.34      |
| 16 | 51.05 | 363604    | 13.58     | 40 | 75.05 | 8266      | 0.31      |
| 17 | 52.10 | 279255    | 10.43     | 41 | 76.15 | 6486      | 0.24      |
| 18 | 53.05 | 2678104   | 100.00    | 42 | 77.05 | 269995    | 10.08     |
| 19 | 54.05 | 2400709   | 89.64     | 43 | 78.05 | 58299     | 2.18      |
| 20 | 55.05 | 1236411   | 46.17     | 44 | 79.05 | 497902    | 18.59     |
| 21 | 56.10 | 172525    | 6.44      | 45 | 80.10 | 62796     | 2.34      |
| 22 | 57.10 | 2529065   | 94.43     | 46 | 81.05 | 398603    | 14.88     |
| 23 | 58.10 | 148753    | 5.55      | 47 | 82.05 | 185392    | 6.92      |
| 24 | 59.05 | 53670     | 2.00      | 48 | 83.05 | 344311    | 12.86     |

| #   | m/z    | Abs. Int. | Rel. Int. | #   | m/z    | Abs. Int. | Rel. Int. |
|-----|--------|-----------|-----------|-----|--------|-----------|-----------|
| 49  | 84.05  | 141353    | 5.28      | 103 | 140.15 | 16981     | 0.63      |
| 50  | 85.05  | 585462    | 21.86     | 104 | 141.10 | 74871     | 2.80      |
| 51  | 86.10  | 57079     | 2.13      | 105 | 142.10 | 6230      | 0.23      |
| 52  | 87.10  | 320129    | 11.95     | 106 | 151.95 | 17304     | 0.65      |
| 53  | 88.05  | 18527     | 0.69      | 107 | 152.95 | 56198     | 2.10      |
| 54  | 89.05  | 5070      | 0.19      | 108 | 153.95 | 2668      | 0.10      |
| 55  | 90.15  | 3296      | 0.12      | 109 | 154.90 | 24849     | 0.93      |
| 56  | 91.05  | 88501     | 3.30      | 110 | 156.90 | 3012      | 0.11      |
| 57  | 92.10  | 26103     | 0.97      | 111 | 163.95 | 3314      | 0.12      |
| 58  | 93.10  | 101887    | 3.80      | 112 | 164.95 | 14662     | 0.55      |
| 59  | 94.15  | 19063     | 0.71      | 113 | 165.90 | 13516     | 0.50      |
| 60  | 95.10  | 187274    | 6.99      | 114 | 166.90 | 14455     | 0.54      |
| 61  | 96.10  | 84214     | 3.14      | 115 | 167.90 | 1527      | 0.06      |
| 62  | 97.10  | 1153552   | 43.07     | 116 | 168.95 | 11919     | 0.45      |
| 63  | 98.10  | 141585    | 5.29      | 117 | 169.90 | 1129      | 0.04      |
| 64  | 99.10  | 708745    | 26.46     | 118 | 170.85 | 5502      | 0.21      |
| 65  | 100.10 | 54879     | 2.05      | 119 | 178.95 | 12514     | 0.47      |
| 66  | 101.10 | 3617      | 0.14      | 120 | 179.95 | 14467     | 0.54      |
| 67  | 102.10 | 2049      | 0.08      | 121 | 180.95 | 661573    | 24.70     |
| 68  | 103.10 | 7673      | 0.29      | 122 | 181.90 | 38188     | 1.43      |
| 69  | 104.10 | 3097      | 0.12      | 123 | 182.90 | 24039     | 0.90      |
| 70  | 105.10 | 28997     | 1.08      | 124 | 183.90 | 1188      | 0.04      |
| 71  | 106.05 | 7262      | 0.27      | 125 | 184.90 | 1162      | 0.04      |
| 72  | 107.05 | 23044     | 0.86      | 126 | 192.85 | 1336      | 0.05      |
| 73  | 108.05 | 7277      | 0.27      | 127 | 193.80 | 3415      | 0.13      |
| 74  | 109.10 | 83071     | 3.10      | 128 | 194.95 | 3093      | 0.12      |
| 75  | 110.10 | 140406    | 5.24      | 129 | 195.90 | 3302      | 0.12      |
| 76  | 111.05 | 68747     | 2.57      | 130 | 196.90 | 1871      | 0.07      |
| 77  | 112.10 | 91570     | 3.42      | 131 | 205.95 | 2086      | 0.08      |
| 78  | 113.10 | 17340     | 0.65      | 132 | 206.95 | 2759      | 0.10      |
| 79  | 114.15 | 1850      | 0.07      | 133 | 207.95 | 29674     | 1.11      |
| 80  | 115.00 | 3558      | 0.13      | 134 | 208.90 | 2038230   | 76.11     |
| 81  | 116.10 | 1057      | 0.04      | 135 | 209.95 | 144752    | 5.41      |
| 82  | 117.15 | 2348      | 0.09      | 136 | 210.95 | 1373512   | 51.29     |
| 83  | 118.05 | 1526      | 0.06      | 137 | 211.90 | 90130     | 3.37      |
| 84  | 119.15 | 6605      | 0.25      | 138 | 212.90 | 2679      | 0.10      |
| 85  | 120.15 | 2802      | 0.10      | 139 | 222.95 | 12665     | 0.47      |
| 86  | 121.15 | 12652     | 0.47      | 140 | 223.95 | 1014487   | 37.88     |
| 87  | 122.15 | 19920     | 0.74      | 141 | 224.95 | 82010     | 3.06      |
| 88  | 123.05 | 13584     | 0.51      | 142 | 225.95 | 721593    | 26.94     |
| 89  | 124.15 | 9325      | 0.35      | 143 | 226.90 | 49569     | 1.85      |
| 90  | 125.10 | 9180      | 0.34      | 144 | 227.95 | 2184      | 0.08      |
| 91  | 125.95 | 8251      | 0.31      | 145 | 235.00 | 1177      | 0.04      |
| 92  | 126.90 | 103833    | 3.88      | 146 | 236.05 | 31688     | 1.18      |
| 93  | 127.95 | 45511     | 1.70      | 147 | 236.95 | 2450420   | 91.50     |
| 94  | 128.85 | 5403      | 0.20      | 148 | 237.95 | 229233    | 8.56      |
| 95  | 131.10 | 1033      | 0.04      | 149 | 238.95 | 1762487   | 65.81     |
| 96  | 133.10 | 320       | 0.01      | 150 | 239.90 | 142146    | 5.31      |
| 97  | 134.05 | 1098      | 0.04      | 151 | 240.90 | 5649      | 0.21      |
| 98  | 135.05 | 1036      | 0.04      | 152 | 265.05 | 1249      | 0.05      |
| 99  | 136.15 | 1239      | 0.05      | 153 | 266.00 | 36438     | 1.36      |
| 100 | 137.15 | 2801      | 0.10      | 154 | 267.00 | 8466      | 0.32      |
| 101 | 138.15 | 9082      | 0.34      | 155 | 268.00 | 24346     | 0.91      |
| 102 | 139.10 | 73847     | 2.76      | 156 | 268.90 | 5393      | 0.20      |

The relative abundances of 239 [M (<sup>18</sup>O)-Et]<sup>+</sup>, 237 [M (<sup>16</sup>O)-Et]<sup>+</sup> are 65.81, 91.50.

$$\frac{[\text{M } (^{18}\text{O})\text{-Et}]^+}{[\text{M } (^{18}\text{O})\text{-Et}]^+ + [\text{M } (^{16}\text{O})\text{-Et}]^+} = \frac{65.81}{65.81+91.50} = 41.835\%$$

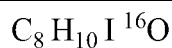

Chemical Formula:  $\text{C}_8\text{H}_{10}\text{I}^{16}\text{O}$

Exact Mass: 248.9776

Molecular Weight: 249.0644

m/z: 248.9776 (100.0%), 249.9810 (8.7%)

Elemental Analysis: C, 38.58; H, 4.05; I, 50.95; O, 6.42

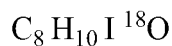

Chemical Formula:  $\text{C}_8\text{H}_{10}\text{I}^{18}\text{O}$

Exact Mass: 250.9819

Molecular Weight: 251.0686

m/z: 250.9819 (100.0%), 251.9852 (8.7%)

Elemental Analysis: C, 38.27; H, 4.01; I, 50.55; O, 7.17



Sample Information

E:\msm\wmy-3-83\_2011-7-4\_5.qgd

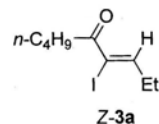

Spectrum

Line#: 1 R.Time:4.4(Scan#:711)  
 MassPeaks:128  
 RawMode:Single 4.4(711) BasePeak:237(3227123)  
 BG Mode:4.3(686) Group 1 - Event 1

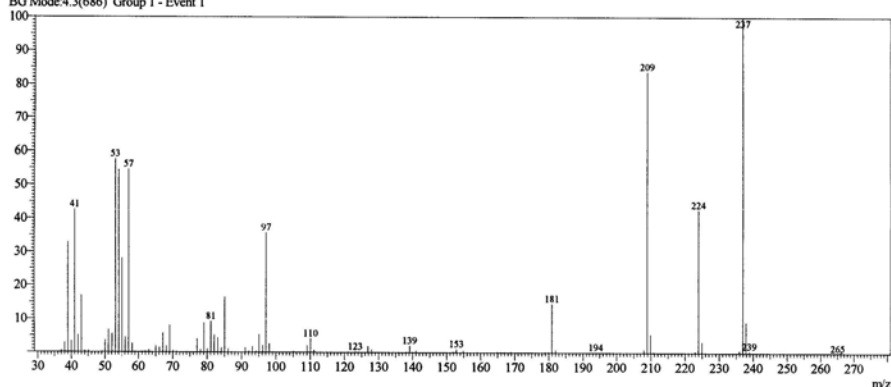

Mass Table

Line#:1 R.Time:4.4(Scan#:711)  
 MassPeaks:128  
 RawMode:Single 4.4(711) BasePeak:237(3227123)  
 BG Mode:4.3(686) Group 1 - Event 1

| #  | m/z   | Abs. Int. | Rel. Int. | #  | m/z   | Abs. Int. | Rel. Int. |
|----|-------|-----------|-----------|----|-------|-----------|-----------|
| 1  | 36.00 | 4259      | 0.13      | 25 | 61.05 | 8801      | 0.27      |
| 2  | 37.05 | 18702     | 0.58      | 26 | 61.95 | 12951     | 0.40      |
| 3  | 38.05 | 91704     | 2.84      | 27 | 63.05 | 26477     | 0.82      |
| 4  | 39.05 | 1061994   | 32.91     | 28 | 64.05 | 7385      | 0.23      |
| 5  | 40.05 | 109710    | 3.40      | 29 | 65.05 | 59458     | 1.84      |
| 6  | 41.05 | 1377324   | 42.68     | 30 | 66.05 | 47386     | 1.47      |
| 7  | 42.05 | 164423    | 5.10      | 31 | 67.05 | 185732    | 5.76      |
| 8  | 43.05 | 547514    | 16.97     | 32 | 68.05 | 60281     | 1.87      |
| 9  | 44.05 | 14932     | 0.46      | 33 | 69.05 | 259047    | 8.03      |
| 10 | 45.05 | 17654     | 0.55      | 34 | 70.05 | 18155     | 0.56      |
| 11 | 46.05 | 2245      | 0.07      | 35 | 71.05 | 10215     | 0.32      |
| 12 | 47.10 | 1119      | 0.03      | 36 | 72.05 | 2440      | 0.08      |
| 13 | 49.05 | 9309      | 0.29      | 37 | 73.05 | 1539      | 0.05      |
| 14 | 50.00 | 115577    | 3.58      | 38 | 74.00 | 6002      | 0.19      |
| 15 | 51.00 | 215786    | 6.69      | 39 | 75.00 | 3406      | 0.11      |
| 16 | 52.05 | 178792    | 5.54      | 40 | 76.05 | 3697      | 0.11      |
| 17 | 53.05 | 1860685   | 57.66     | 41 | 77.05 | 129498    | 4.01      |
| 18 | 54.05 | 1757780   | 54.47     | 42 | 78.05 | 28688     | 0.89      |
| 19 | 55.05 | 905906    | 28.07     | 43 | 79.05 | 283074    | 8.77      |
| 20 | 56.05 | 143675    | 4.45      | 44 | 80.05 | 33699     | 1.04      |
| 21 | 57.05 | 1762054   | 54.60     | 45 | 81.05 | 298916    | 9.26      |
| 22 | 58.10 | 87289     | 2.70      | 46 | 82.05 | 166564    | 5.16      |
| 23 | 59.00 | 8230      | 0.26      | 47 | 83.05 | 140799    | 4.36      |
| 24 | 60.05 | 2828      | 0.09      | 48 | 84.10 | 45250     | 1.40      |

| #  | m/z    | Abs. Int. | Rel. Int. | #   | m/z               | Abs. Int.          | Rel. Int.         |
|----|--------|-----------|-----------|-----|-------------------|--------------------|-------------------|
| 49 | 85.05  | 532319    | 16.50     | 89  | 140.95            | 20323              | 0.63              |
| 50 | 86.10  | 34099     | 1.06      | 90  | 151.90            | 10855              | 0.34              |
| 51 | 87.00  | 3935      | 0.12      | 91  | 152.90            | 33878              | 1.05              |
| 52 | 89.05  | 2703      | 0.08      | 92  | 153.95            | 2654               | 0.08              |
| 53 | 90.15  | 1479      | 0.05      | 93  | 154.90            | 18852              | 0.58              |
| 54 | 91.05  | 45800     | 1.42      | 94  | 163.85            | 2411               | 0.07              |
| 55 | 92.10  | 15506     | 0.48      | 95  | 164.90            | 8772               | 0.27              |
| 56 | 93.10  | 56910     | 1.76      | 96  | 165.95            | 7192               | 0.22              |
| 57 | 94.10  | 16002     | 0.50      | 97  | 166.95            | 8590               | 0.27              |
| 58 | 95.05  | 174018    | 5.39      | 98  | 167.95            | 1522               | 0.05              |
| 59 | 96.10  | 69404     | 2.15      | 99  | 168.90            | 10226              | 0.32              |
| 60 | 97.05  | 1155444   | 35.80     | 100 | 178.95            | 8632               | 0.27              |
| 61 | 98.05  | 86844     | 2.69      | 101 | 179.95            | 7847               | 0.24              |
| 62 | 99.00  | 5462      | 0.17      | 102 | 180.95            | 472019             | 14.63             |
| 63 | 103.05 | 4027      | 0.12      | 103 | 181.95            | 28741              | 0.89              |
| 64 | 104.15 | 1592      | 0.05      | 104 | 182.90            | 1562               | 0.05              |
| 65 | 105.10 | 13620     | 0.42      | 105 | 192.80            | 1409               | 0.04              |
| 66 | 106.05 | 3988      | 0.12      | 106 | 193.85            | 3769               | 0.12              |
| 67 | 107.10 | 6761      | 0.21      | 107 | 194.90            | 2466               | 0.08              |
| 68 | 108.10 | 5105      | 0.16      | 108 | 195.85            | 1325               | 0.04              |
| 69 | 109.10 | 64631     | 2.00      | 109 | 205.75            | 1621               | 0.05              |
| 70 | 110.10 | 133284    | 4.13      | 110 | 206.95            | 2903               | 0.09              |
| 71 | 111.10 | 22759     | 0.71      | 111 | 207.95            | 31324              | 0.97              |
| 72 | 111.90 | 1530      | 0.05      | 112 | 208.90            | 2702919            | 83.76             |
| 73 | 114.80 | 1393      | 0.04      | 113 | 209.90            | 178177             | 5.52              |
| 74 | 117.30 | 1318      | 0.04      | 114 | 210.85            | 11772              | 0.36              |
| 75 | 119.00 | 2937      | 0.09      | 115 | 220.90            | 1726               | 0.05              |
| 76 | 120.15 | 1036      | 0.03      | 116 | 221.95            | 1031               | 0.03              |
| 77 | 121.10 | 7306      | 0.23      | 117 | 222.95            | 15165              | 0.47              |
| 78 | 122.10 | 2690      | 0.08      | 118 | 223.90            | 1375593            | 42.63             |
| 79 | 123.15 | 8950      | 0.28      | 119 | 224.90            | 104665             | 3.24              |
| 80 | 124.10 | 8681      | 0.27      | 120 | 225.85            | 6547               | 0.20              |
| 81 | 125.95 | 1925      | 0.06      | 121 | 234.95            | 1205               | 0.04              |
| 82 | 126.90 | 62526     | 1.94      | 122 | 235.95            | 23282              | 0.72              |
| 83 | 127.95 | 29915     | 0.93      | 123 | <del>236.95</del> | <del>3227123</del> | <del>100.00</del> |
| 84 | 128.90 | 2356      | 0.07      | 124 | 237.90            | 294095             | 9.11              |
| 85 | 137.15 | 1325      | 0.04      | 125 | 238.90            | 17948              | 0.56              |
| 86 | 138.15 | 4412      | 0.14      | 126 | 265.05            | 1006               | 0.03              |
| 87 | 139.10 | 65801     | 2.04      | 127 | <del>266.00</del> | <del>38471</del>   | <del>1.19</del>   |
| 88 | 139.90 | 7145      | 0.22      | 128 | 267.05            | 5884               | 0.18              |

The relative abundances of 239 [M (<sup>18</sup>O)-Et]<sup>+</sup>, 237 [M (<sup>16</sup>O)-Et]<sup>+</sup> are 0.56, 100.

$$\frac{[\text{M } (^{18}\text{O})\text{-Et}]^+}{[\text{M } (^{18}\text{O})\text{-Et}]^+ + [\text{M } (^{16}\text{O})\text{-Et}]^+} = \frac{0.56}{0.56 + 100} = 0.557\%$$

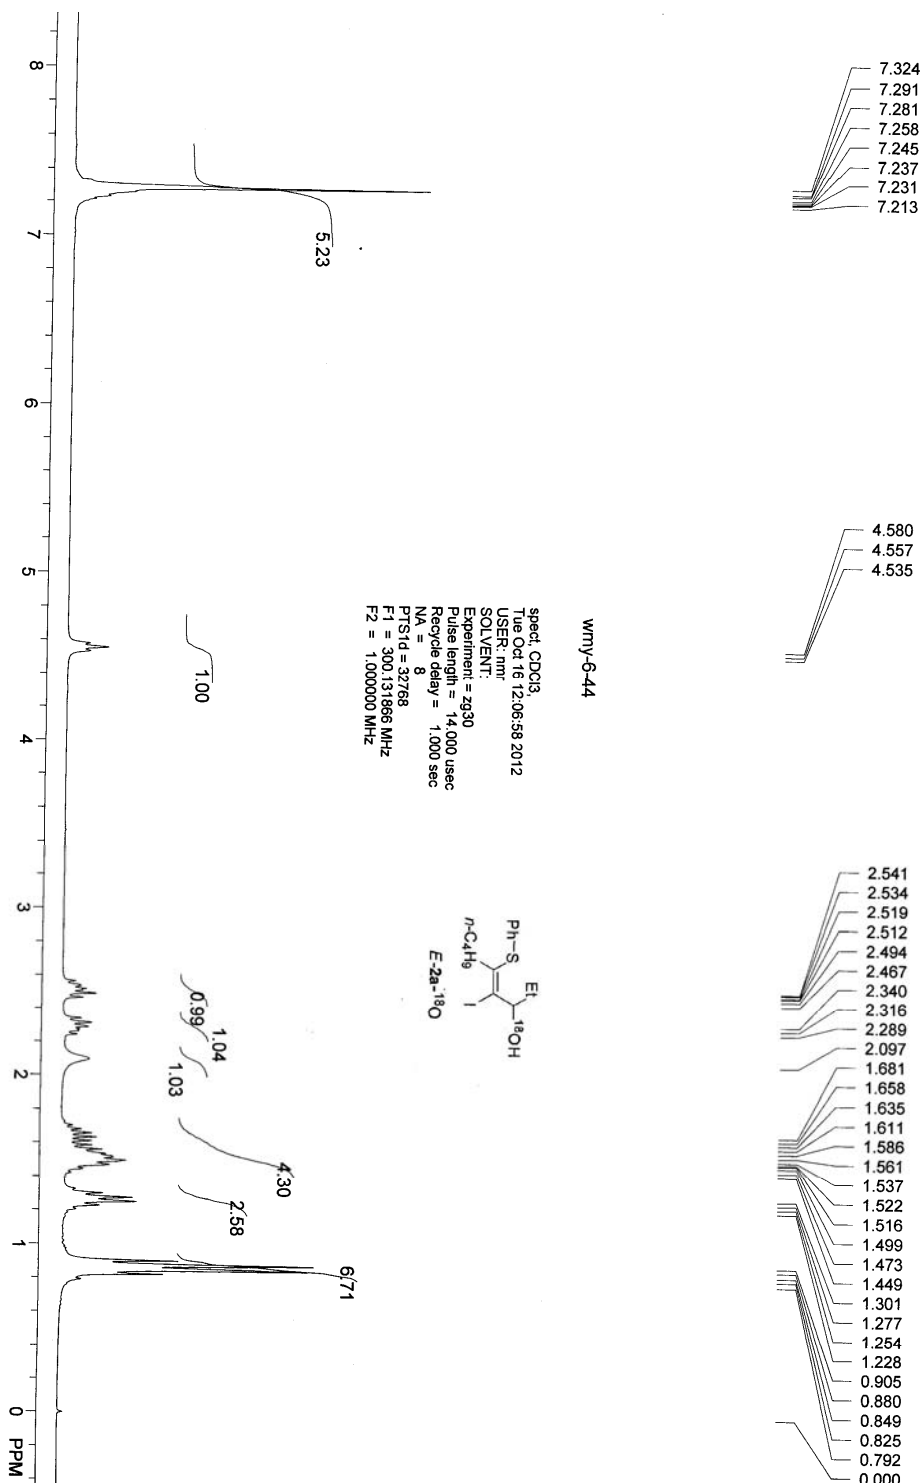

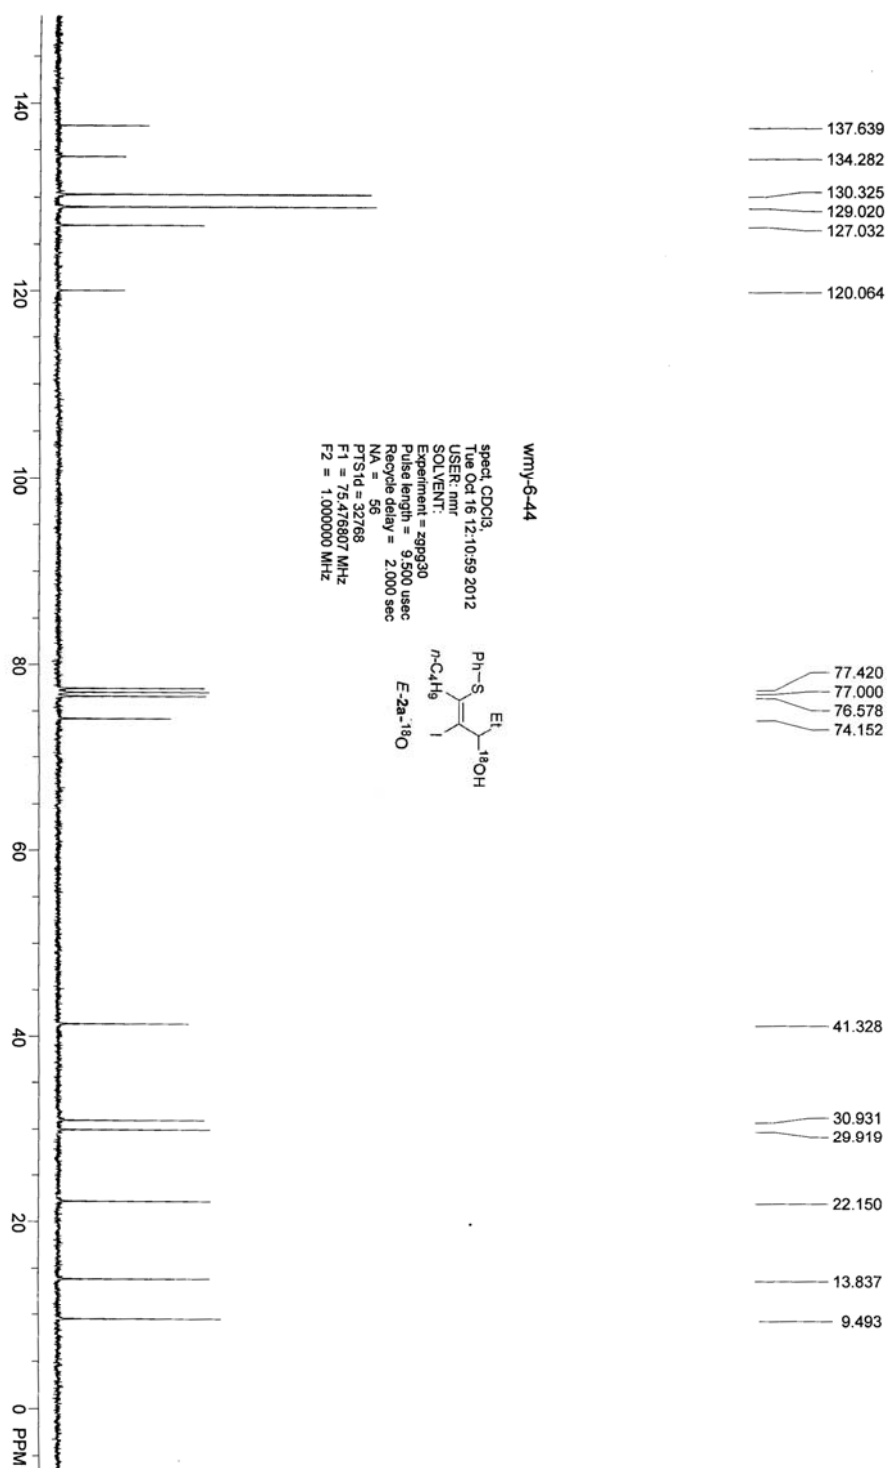

Sample Information

E:\msm\wmy-6-44\_2012-10-18\_6.qgd

Spectrum

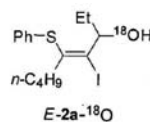

Line#:1 R.Time:6.5(Scan#:1346)  
 MassPeaks:116  
 RawMode:Single 6.5(1346) BasePeak:141(186299)  
 BG Mode:6.4(1325) Group 1 - Event 1

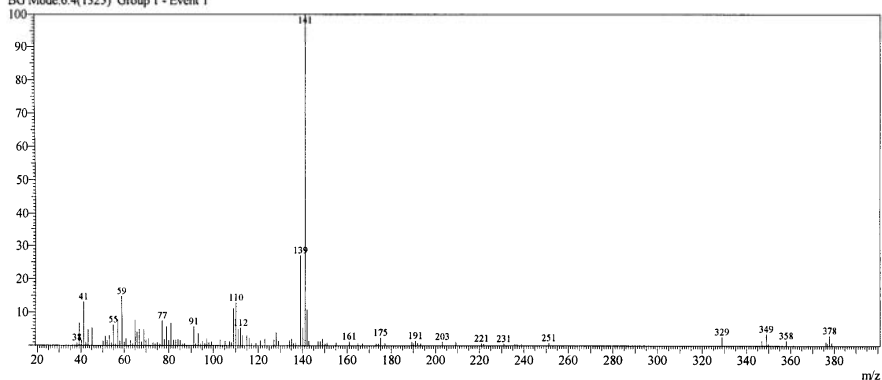

Mass Table

Line#:1 R.Time:6.5(Scan#:1346)  
 MassPeaks:116  
 RawMode:Single 6.5(1346) BasePeak:141(186299)  
 BG Mode:6.4(1325) Group 1 - Event 1

| #  | m/z   | Abs. Int. | Rel. Int. | #  | m/z   | Abs. Int. | Rel. Int. |
|----|-------|-----------|-----------|----|-------|-----------|-----------|
| 1  | 38.05 | 1595      | 0.86      | 25 | 68.00 | 2226      | 1.19      |
| 2  | 39.00 | 12774     | 6.86      | 26 | 69.05 | 9126      | 4.90      |
| 3  | 40.05 | 2932      | 1.57      | 27 | 69.95 | 3281      | 1.76      |
| 4  | 41.10 | 24544     | 13.17     | 28 | 70.95 | 4042      | 2.17      |
| 5  | 42.05 | 2041      | 1.10      | 29 | 73.05 | 1826      | 0.98      |
| 6  | 43.10 | 9028      | 4.85      | 30 | 74.00 | 1222      | 0.66      |
| 7  | 45.05 | 9990      | 5.36      | 31 | 75.05 | 2030      | 1.09      |
| 8  | 50.15 | 2544      | 1.37      | 32 | 76.10 | 1017      | 0.55      |
| 9  | 51.10 | 5382      | 2.89      | 33 | 77.10 | 14061     | 7.55      |
| 10 | 52.05 | 2808      | 1.51      | 34 | 78.10 | 3552      | 1.91      |
| 11 | 53.05 | 5742      | 3.08      | 35 | 79.05 | 10647     | 5.72      |
| 12 | 54.05 | 1750      | 0.94      | 36 | 80.05 | 3133      | 1.68      |
| 13 | 55.00 | 11635     | 6.25      | 37 | 81.00 | 12640     | 6.78      |
| 14 | 56.00 | 858       | 0.46      | 38 | 82.15 | 3188      | 1.71      |
| 15 | 57.05 | 14565     | 7.82      | 39 | 83.10 | 3174      | 1.70      |
| 16 | 58.00 | 2681      | 1.44      | 40 | 84.05 | 3583      | 1.92      |
| 17 | 59.05 | 27640     | 14.84     | 41 | 85.10 | 3046      | 1.64      |
| 18 | 60.10 | 1996      | 1.07      | 42 | 86.15 | 1097      | 0.59      |
| 19 | 60.95 | 4080      | 2.19      | 43 | 86.95 | 1285      | 0.69      |
| 20 | 63.00 | 3135      | 1.68      | 44 | 91.10 | 10682     | 5.73      |
| 21 | 64.05 | 1198      | 0.64      | 45 | 92.05 | 1363      | 0.73      |
| 22 | 65.10 | 14506     | 7.79      | 46 | 93.10 | 6918      | 3.71      |
| 23 | 66.00 | 7816      | 4.20      | 47 | 94.05 | 1008      | 0.54      |
| 24 | 67.05 | 9281      | 4.98      | 48 | 95.05 | 2511      | 1.35      |

| #  | m/z    | Abs. Int. | Rel. Int. | #   | m/z    | Abs. Int. | Rel. Int. |
|----|--------|-----------|-----------|-----|--------|-----------|-----------|
| 49 | 96.15  | 1298      | 0.70      | 83  | 149.05 | 3882      | 2.08      |
| 50 | 97.10  | 3940      | 2.11      | 84  | 150.15 | 1040      | 0.56      |
| 51 | 98.00  | 1906      | 1.02      | 85  | 151.10 | 1612      | 0.87      |
| 52 | 99.10  | 2291      | 1.23      | 86  | 155.05 | 1761      | 0.95      |
| 53 | 103.05 | 3396      | 1.82      | 87  | 160.95 | 2351      | 1.26      |
| 54 | 105.20 | 2643      | 1.42      | 88  | 164.90 | 1420      | 0.76      |
| 55 | 107.20 | 2406      | 1.29      | 89  | 166.95 | 1232      | 0.66      |
| 56 | 108.05 | 1875      | 1.01      | 90  | 173.05 | 1227      | 0.66      |
| 57 | 109.00 | 20987     | 11.27     | 91  | 174.00 | 1266      | 0.68      |
| 58 | 110.05 | 24060     | 12.91     | 92  | 175.00 | 4441      | 2.38      |
| 59 | 111.10 | 9134      | 4.90      | 93  | 177.10 | 1350      | 0.72      |
| 60 | 112.15 | 9925      | 5.33      | 94  | 189.20 | 2137      | 1.15      |
| 61 | 113.05 | 5874      | 3.15      | 95  | 189.95 | 1376      | 0.74      |
| 62 | 115.05 | 5880      | 3.16      | 96  | 190.85 | 2675      | 1.44      |
| 63 | 116.05 | 4154      | 2.23      | 97  | 191.90 | 1311      | 0.70      |
| 64 | 117.00 | 1535      | 0.82      | 98  | 193.20 | 1215      | 0.65      |
| 65 | 119.00 | 1516      | 0.81      | 99  | 203.05 | 2219      | 1.19      |
| 66 | 121.05 | 2863      | 1.54      | 100 | 209.10 | 2073      | 1.11      |
| 67 | 123.10 | 3711      | 1.99      | 101 | 220.85 | 1255      | 0.67      |
| 68 | 127.05 | 3221      | 1.73      | 102 | 221.85 | 1033      | 0.55      |
| 69 | 128.05 | 7495      | 4.02      | 103 | 231.00 | 1158      | 0.62      |
| 70 | 129.10 | 2719      | 1.46      | 104 | 235.90 | 1126      | 0.60      |
| 71 | 133.10 | 307       | 0.16      | 105 | 236.90 | 1010      | 0.54      |
| 72 | 134.05 | 3138      | 1.68      | 106 | 238.80 | 1062      | 0.57      |
| 73 | 135.10 | 3888      | 2.09      | 107 | 251.20 | 1580      | 0.85      |
| 74 | 135.95 | 1431      | 0.77      | 108 | 328.85 | 4961      | 2.66      |
| 75 | 137.00 | 1497      | 0.80      | 109 | 346.90 | 3058      | 1.64      |
| 76 | 139.10 | 50578     | 27.15     | 110 | 348.95 | 6631      | 3.56      |
| 77 | 140.15 | 9981      | 5.36      | 111 | 349.85 | 1068      | 0.57      |
| 78 | 141.15 | 186299    | 100.00    | 112 | 358.00 | 2905      | 1.56      |
| 79 | 142.15 | 20125     | 10.80     | 113 | 376.00 | 2239      | 1.20      |
| 80 | 142.95 | 2718      | 1.46      | 114 | 376.95 | 1435      | 0.77      |
| 81 | 147.05 | 2473      | 1.33      | 115 | 377.95 | 5714      | 3.07      |
| 82 | 148.05 | 2475      | 1.33      | 116 | 378.90 | 1810      | 0.97      |

Chemical Formula: C<sub>15</sub>H<sub>21</sub>I<sup>16</sup>OS

Exact Mass: 376.0358

Molecular Weight: 376.2961

m/z: 376.0358 (100.0%), 377.0391 (17.3%), 378.0316 (4.5%)

Elemental Analysis: C, 47.88; H, 5.63; I, 33.72; O, 4.25; S, 8.52

Chemical Formula: C<sub>15</sub>H<sub>21</sub>I<sup>18</sup>OS

Exact Mass: 378.0400

Molecular Weight: 378.2959

m/z: 378.0400 (100.0%), 379.0434 (17.0%), 380.0358 (4.6%)

Elemental Analysis: C, 47.62; H, 5.60; I, 33.55; O, 4.76; S, 8.48

The relative abundances of 378 [M (<sup>18</sup>O)]<sup>+</sup>, 376 [M (<sup>16</sup>O)]<sup>+</sup> are 3.07, 1.20

$$(3.07-1.20*4.5\%)/(3.07-1.20*4.5\%+1.20)=71.54\%$$

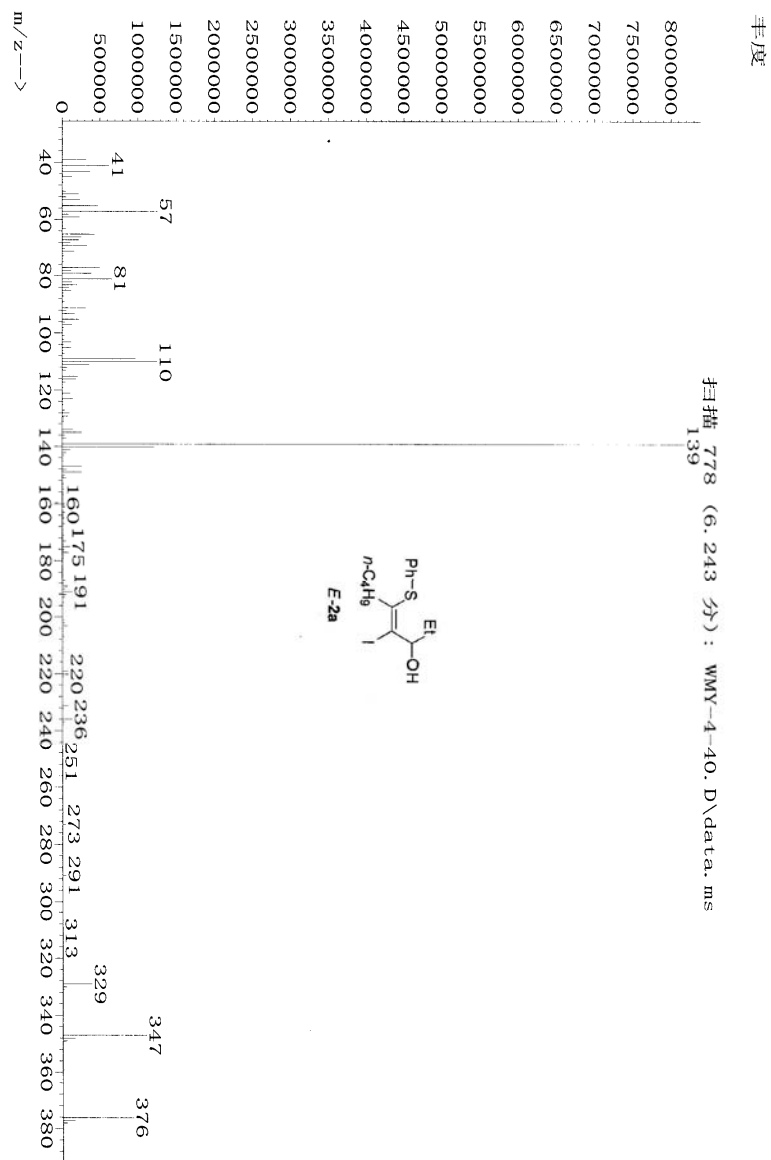

扫描 778 (6.243 分): WMY-4-40.D\data.ms

|       |         |        |         |        |        |        |        |        |       |
|-------|---------|--------|---------|--------|--------|--------|--------|--------|-------|
| 37.15 | 4085    | 93.15  | 171200  | 145.15 | 17608  | 196.05 | 4800   | 250.15 | 16105 |
| 39.15 | 322368  | 95.15  | 234304  | 147.05 | 263680 | 196.95 | 4717   | 251.15 | 6912  |
| 41.15 | 627840  | 96.15  | 42960   | 148.15 | 64408  | 199.05 | 6817   | 252.15 | 1772  |
| 43.15 | 369664  | 97.15  | 133632  | 149.05 | 261696 | 201.15 | 22408  | 252.95 | 1463  |
| 45.05 | 133120  | 98.15  | 23016   | 150.15 | 38344  | 202.15 | 37288  | 254.05 | 253   |
| 46.05 | 3963    | 99.05  | 20192   | 151.05 | 56616  | 203.15 | 69296  | 254.95 | 476   |
| 47.05 | 13652   | 100.05 | 13292   | 152.15 | 11997  | 204.15 | 13782  | 256.15 | 433   |
| 47.95 | 406     | 101.05 | 34808   | 153.15 | 17776  | 205.15 | 16146  | 256.85 | 861   |
| 50.15 | 51920   | 102.15 | 31488   | 154.15 | 10932  | 206.15 | 13225  | 258.05 | 253   |
| 51.15 | 219392  | 103.15 | 124952  | 155.05 | 27264  | 207.15 | 24728  | 259.85 | 417   |
| 52.15 | 59472   | 104.15 | 22048   | 156.15 | 16245  | 208.15 | 4246   | 260.95 | 394   |
| 53.15 | 237120  | 105.15 | 129480  | 157.15 | 19816  | 208.95 | 9091   | 262.95 | 601   |
| 55.15 | 473728  | 106.15 | 19064   | 158.05 | 11717  | 210.95 | 9295   | 265.05 | 2413  |
| 57.15 | 1257984 | 107.15 | 35536   | 159.15 | 12637  | 212.95 | 14839  | 265.95 | 720   |
| 58.15 | 83744   | 109.05 | 974592  | 160.05 | 38840  | 214.05 | 1364   | 267.05 | 2912  |
| 59.15 | 228672  | 110.05 | 1252352 | 161.05 | 74208  | 215.15 | 9105   | 268.95 | 14211 |
| 60.15 | 11887   | 111.05 | 356416  | 163.05 | 83624  | 216.15 | 4334   | 269.95 | 1461  |
| 61.05 | 10838   | 112.05 | 68304   | 164.05 | 19696  | 217.15 | 2800   | 270.85 | 950   |
| 62.25 | 11654   | 113.05 | 51264   | 165.05 | 30616  | 219.15 | 77456  | 272.95 | 39640 |
| 63.15 | 51744   | 115.15 | 208128  | 166.95 | 65456  | 220.15 | 80280  | 273.95 | 4059  |
| 65.15 | 435584  | 116.15 | 186816  | 168.15 | 7201   | 221.15 | 16440  | 274.95 | 3230  |
| 66.15 | 252160  | 117.15 | 44952   | 169.05 | 15217  | 222.15 | 4625   | 276.05 | 2800  |
| 67.15 | 231936  | 118.15 | 6768    | 171.05 | 26856  | 223.05 | 4018   | 276.95 | 903   |
| 68.15 | 107624  | 119.15 | 15331   | 172.15 | 16239  | 224.15 | 1670   | 278.05 | 302   |
| 69.05 | 331008  | 121.05 | 111472  | 173.05 | 54008  | 225.05 | 1914   | 278.95 | 3745  |
| 70.15 | 37800   | 123.05 | 147136  | 174.15 | 19200  | 226.05 | 1406   | 280.05 | 608   |
| 71.05 | 162432  | 124.15 | 19056   | 175.05 | 103440 | 226.95 | 1739   | 281.05 | 1148  |
| 72.05 | 16744   | 125.05 | 22264   | 176.15 | 27384  | 228.05 | 326    | 281.95 | 462   |
| 73.05 | 27400   | 127.05 | 49728   | 177.05 | 88880  | 229.15 | 3360   | 282.55 | 188   |
| 74.05 | 16776   | 128.05 | 100160  | 178.05 | 25144  | 231.15 | 75688  | 283.15 | 255   |
| 75.15 | 22504   | 129.15 | 81264   | 179.05 | 18512  | 232.15 | 16552  | 285.95 | 1772  |
| 77.15 | 503680  | 130.15 | 20256   | 181.05 | 9196   | 233.15 | 5022   | 286.95 | 2324  |
| 78.15 | 122880  | 131.15 | 22864   | 182.95 | 13093  | 234.15 | 1201   | 288.15 | 552   |
| 79.15 | 399104  | 132.05 | 4539    | 184.15 | 6833   | 235.95 | 132864 | 289.05 | 3421  |
| 81.15 | 659392  | 134.05 | 151936  | 185.05 | 10438  | 236.95 | 31152  | 290.95 | 47184 |
| 82.15 | 131712  | 135.05 | 262720  | 186.15 | 7191   | 237.95 | 9993   | 291.95 | 5136  |
| 83.15 | 199488  | 136.05 | 38952   | 187.05 | 40784  | 238.95 | 2238   | 293.05 | 2273  |
| 84.05 | 93472   | 137.15 | 58088   | 188.15 | 24432  | 239.95 | 1055   | 294.05 | 306   |
| 85.05 | 122456  | 139.15 | 8388096 | 189.15 | 72976  | 240.95 | 1140   | 295.25 | 166   |
| 86.05 | 24496   | 140.15 | 1204224 | 190.15 | 42872  | 242.05 | 631    | 296.85 | 707   |
| 87.05 | 29336   | 141.15 | 112536  | 191.15 | 133504 | 242.95 | 755    | 298.05 | 304   |
| 89.05 | 35808   | 142.15 | 53272   | 192.15 | 59720  | 247.15 | 13853  | 299.05 | 2127  |
| 91.15 | 318848  | 143.15 | 29144   | 193.05 | 31368  | 248.15 | 17408  | 299.95 | 813   |
| 92.15 | 55200   | 144.15 | 11928   | 194.95 | 25752  | 249.15 | 94552  | 301.05 | 1010  |



|        |         |
|--------|---------|
| 302.05 | 1062    |
| 303.05 | 1274    |
| 304.05 | 452     |
| 305.05 | 2887    |
| 305.95 | 538     |
| 307.05 | 259     |
| 311.15 | 189     |
| 313.05 | 2491    |
| 314.15 | 322     |
| 315.05 | 748     |
| 316.05 | 239     |
| 317.05 | 944     |
| 319.05 | 8138    |
| 320.05 | 1252    |
| 320.95 | 427     |
| 327.05 | 194     |
| 329.05 | 384384  |
| 330.05 | 57008   |
| 331.05 | 22776   |
| 332.05 | 2685    |
| 333.05 | 368     |
| 334.05 | 8198    |
| 335.05 | 1142    |
| 336.05 | 305     |
| 343.05 | 261     |
| 345.05 | 11488   |
| 347.05 | 1103872 |
| 348.05 | 166336  |
| 349.05 | 63312   |
| 350.05 | 8964    |
| 351.05 | 839     |
| 356.05 | 160     |
| 357.15 | 1594    |
| 358.05 | 11138   |
| 359.15 | 16408   |
| 360.05 | 2668    |
| 361.15 | 1581    |
| 361.95 | 295     |
| 371.55 | 179     |
| 374.05 | 459     |
| 376.15 | 930496  |
| 377.15 | 160448  |
| 378.05 | 57904   |
| 379.15 | 8180    |
| 380.05 | 771     |
| 381.15 | 205     |

The relative abundances of  $378 [M (^{18}O)]^+$ ,  $376 [M (^{16}O)]^+$  are 57904, 930496.

$$(57904-930496*4.5\%)/(57904-930496*4.5\%+930496)=1.69 \%$$

Sample Information  
 E:\msm\wmy-6-45\_2012-10-18\_7.qgd

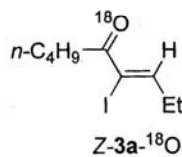

Spectrum

Line#:1 R.Time:4.4(Scan#:734)  
 MassPeaks:141  
 RawMode:Single 4.4(734) BasePeak:237(3527637)  
 BG Mode:None Group 1 - Event 1

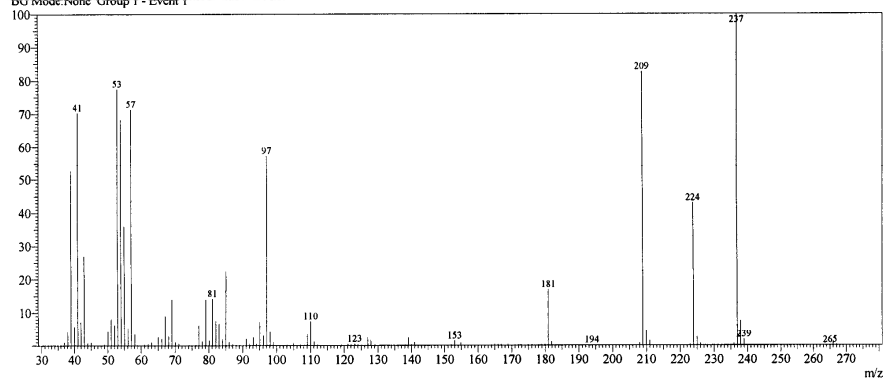

Mass Table

Line#:1 R.Time:4.4(Scan#:734)

MassPeaks:141

RawMode:Single 4.4(734) BasePeak:237(3527637)

BG Mode:None Group 1 - Event 1

| #  | m/z   | Abs. Int. | Rel. Int. | #  | m/z   | Abs. Int. | Rel. Int. |
|----|-------|-----------|-----------|----|-------|-----------|-----------|
| 1  | 36.05 | 3150      | 0.09      | 25 | 60.05 | 2761      | 0.08      |
| 2  | 37.05 | 31836     | 0.90      | 26 | 61.00 | 12972     | 0.37      |
| 3  | 38.05 | 144470    | 4.10      | 27 | 62.00 | 16377     | 0.46      |
| 4  | 39.05 | 1855934   | 52.61     | 28 | 63.00 | 36076     | 1.02      |
| 5  | 40.10 | 205938    | 5.84      | 29 | 64.05 | 12058     | 0.34      |
| 6  | 41.10 | 2481183   | 70.34     | 30 | 65.05 | 90704     | 2.57      |
| 7  | 42.05 | 257800    | 7.31      | 31 | 66.05 | 72224     | 2.05      |
| 8  | 43.05 | 952441    | 27.00     | 32 | 67.05 | 319970    | 9.07      |
| 9  | 44.05 | 29123     | 0.83      | 33 | 68.05 | 100219    | 2.84      |
| 10 | 45.10 | 38534     | 1.09      | 34 | 69.05 | 492858    | 13.97     |
| 11 | 46.05 | 3499      | 0.10      | 35 | 70.10 | 38271     | 1.08      |
| 12 | 47.00 | 1196      | 0.03      | 36 | 71.05 | 24042     | 0.68      |
| 13 | 47.95 | 1123      | 0.03      | 37 | 72.05 | 1978      | 0.06      |
| 14 | 49.05 | 13774     | 0.39      | 38 | 73.05 | 3145      | 0.09      |
| 15 | 50.05 | 148163    | 4.20      | 39 | 74.10 | 7327      | 0.21      |
| 16 | 51.05 | 285607    | 8.10      | 40 | 75.00 | 6290      | 0.18      |
| 17 | 52.05 | 225391    | 6.39      | 41 | 76.15 | 5570      | 0.16      |
| 18 | 53.05 | 2735454   | 77.54     | 42 | 77.05 | 221713    | 6.29      |
| 19 | 54.05 | 2408901   | 68.29     | 43 | 78.05 | 47486     | 1.35      |
| 20 | 55.05 | 1269043   | 35.97     | 44 | 79.10 | 491020    | 13.92     |
| 21 | 56.10 | 195071    | 5.53      | 45 | 80.10 | 52255     | 1.48      |
| 22 | 57.10 | 2518937   | 71.41     | 46 | 81.05 | 503023    | 14.26     |
| 23 | 58.10 | 121311    | 3.44      | 47 | 82.05 | 266321    | 7.55      |
| 24 | 59.00 | 11276     | 0.32      | 48 | 83.05 | 237594    | 6.74      |

| #  | m/z    | Abs. Int. | Rel. Int. | #   | m/z    | Abs. Int. | Rel. Int. |
|----|--------|-----------|-----------|-----|--------|-----------|-----------|
| 49 | 84.10  | 66630     | 1.89      | 96  | 139.10 | 82162     | 2.33      |
| 50 | 85.05  | 792856    | 22.48     | 97  | 139.95 | 11041     | 0.31      |
| 51 | 86.05  | 40178     | 1.14      | 98  | 140.90 | 32946     | 0.93      |
| 52 | 87.05  | 15765     | 0.45      | 99  | 141.90 | 1068      | 0.03      |
| 53 | 88.15  | 1013      | 0.03      | 100 | 151.95 | 10727     | 0.30      |
| 54 | 89.05  | 2787      | 0.08      | 101 | 153.00 | 49119     | 1.39      |
| 55 | 90.15  | 1563      | 0.04      | 102 | 153.95 | 1821      | 0.05      |
| 56 | 91.05  | 72499     | 2.06      | 103 | 154.90 | 26022     | 0.74      |
| 57 | 92.05  | 17854     | 0.51      | 104 | 164.95 | 12131     | 0.34      |
| 58 | 93.10  | 90214     | 2.56      | 105 | 165.95 | 10754     | 0.30      |
| 59 | 94.05  | 17962     | 0.51      | 106 | 166.90 | 11417     | 0.32      |
| 60 | 95.05  | 255886    | 7.25      | 107 | 167.95 | 1818      | 0.05      |
| 61 | 96.10  | 110822    | 3.14      | 108 | 168.90 | 13305     | 0.38      |
| 62 | 97.10  | 2023430   | 57.36     | 109 | 178.90 | 12306     | 0.35      |
| 63 | 98.10  | 142425    | 4.04      | 110 | 179.95 | 10924     | 0.31      |
| 64 | 99.05  | 37005     | 1.05      | 111 | 180.90 | 598399    | 16.96     |
| 65 | 100.10 | 2482      | 0.07      | 112 | 181.90 | 37036     | 1.05      |
| 66 | 101.95 | 1071      | 0.03      | 113 | 182.90 | 2226      | 0.06      |
| 67 | 103.00 | 7794      | 0.22      | 114 | 190.00 | 1215      | 0.03      |
| 68 | 104.15 | 2862      | 0.08      | 115 | 192.95 | 1414      | 0.04      |
| 69 | 105.05 | 27011     | 0.77      | 116 | 193.90 | 4959      | 0.14      |
| 70 | 106.15 | 7482      | 0.21      | 117 | 194.75 | 2623      | 0.07      |
| 71 | 107.10 | 12748     | 0.36      | 118 | 195.80 | 1612      | 0.05      |
| 72 | 108.10 | 7398      | 0.21      | 119 | 205.90 | 2233      | 0.06      |
| 73 | 109.10 | 117465    | 3.33      | 120 | 206.95 | 4840      | 0.14      |
| 74 | 110.10 | 262706    | 7.45      | 121 | 207.95 | 28953     | 0.82      |
| 75 | 111.10 | 41599     | 1.18      | 122 | 208.90 | 2915078   | 82.64     |
| 76 | 112.15 | 7876      | 0.22      | 123 | 209.95 | 159771    | 4.53      |
| 77 | 113.10 | 1055      | 0.03      | 124 | 210.95 | 51225     | 1.45      |
| 78 | 115.10 | 2662      | 0.08      | 125 | 211.95 | 2069      | 0.06      |
| 79 | 117.10 | 1932      | 0.05      | 126 | 219.00 | 1689      | 0.05      |
| 80 | 118.05 | 1068      | 0.03      | 127 | 220.95 | 1937      | 0.05      |
| 81 | 119.10 | 7148      | 0.20      | 128 | 222.95 | 12195     | 0.35      |
| 82 | 120.05 | 2747      | 0.08      | 129 | 223.90 | 1516479   | 42.99     |
| 83 | 121.10 | 13369     | 0.38      | 130 | 224.95 | 91091     | 2.58      |
| 84 | 122.05 | 5611      | 0.16      | 131 | 225.95 | 24206     | 0.69      |
| 85 | 123.10 | 18546     | 0.53      | 132 | 227.00 | 1234      | 0.03      |
| 86 | 124.00 | 11148     | 0.32      | 133 | 235.95 | 20391     | 0.58      |
| 87 | 124.95 | 1546      | 0.04      | 134 | 236.95 | 3527637   | 100.00    |
| 88 | 125.95 | 2301      | 0.07      | 135 | 237.95 | 264180    | 7.49      |
| 89 | 126.95 | 83664     | 2.37      | 136 | 238.95 | 64847     | 1.84      |
| 90 | 127.90 | 57081     | 1.62      | 137 | 239.90 | 4953      | 0.14      |
| 91 | 129.10 | 3705      | 0.11      | 138 | 265.05 | 1775      | 0.05      |
| 92 | 133.45 | 1607      | 0.05      | 139 | 266.00 | 40806     | 1.16      |
| 93 | 136.30 | 2098      | 0.06      | 140 | 267.00 | 9407      | 0.27      |
| 94 | 137.15 | 1351      | 0.04      | 141 | 267.95 | 1340      | 0.04      |
| 95 | 138.10 | 9439      | 0.27      |     |        |           |           |

The relative abundances of 239 [M (<sup>18</sup>O)-Et]<sup>+</sup>, 237 [M (<sup>16</sup>O)-Et]<sup>+</sup> are 1.84, 100

$$\frac{[\text{M} (^{18}\text{O})\text{-Et}]^+}{[\text{M} (^{18}\text{O})\text{-Et}]^+ + [\text{M} (^{16}\text{O})\text{-Et}]^+} = \frac{1.84}{1.84 + 100} = 1.81\%$$

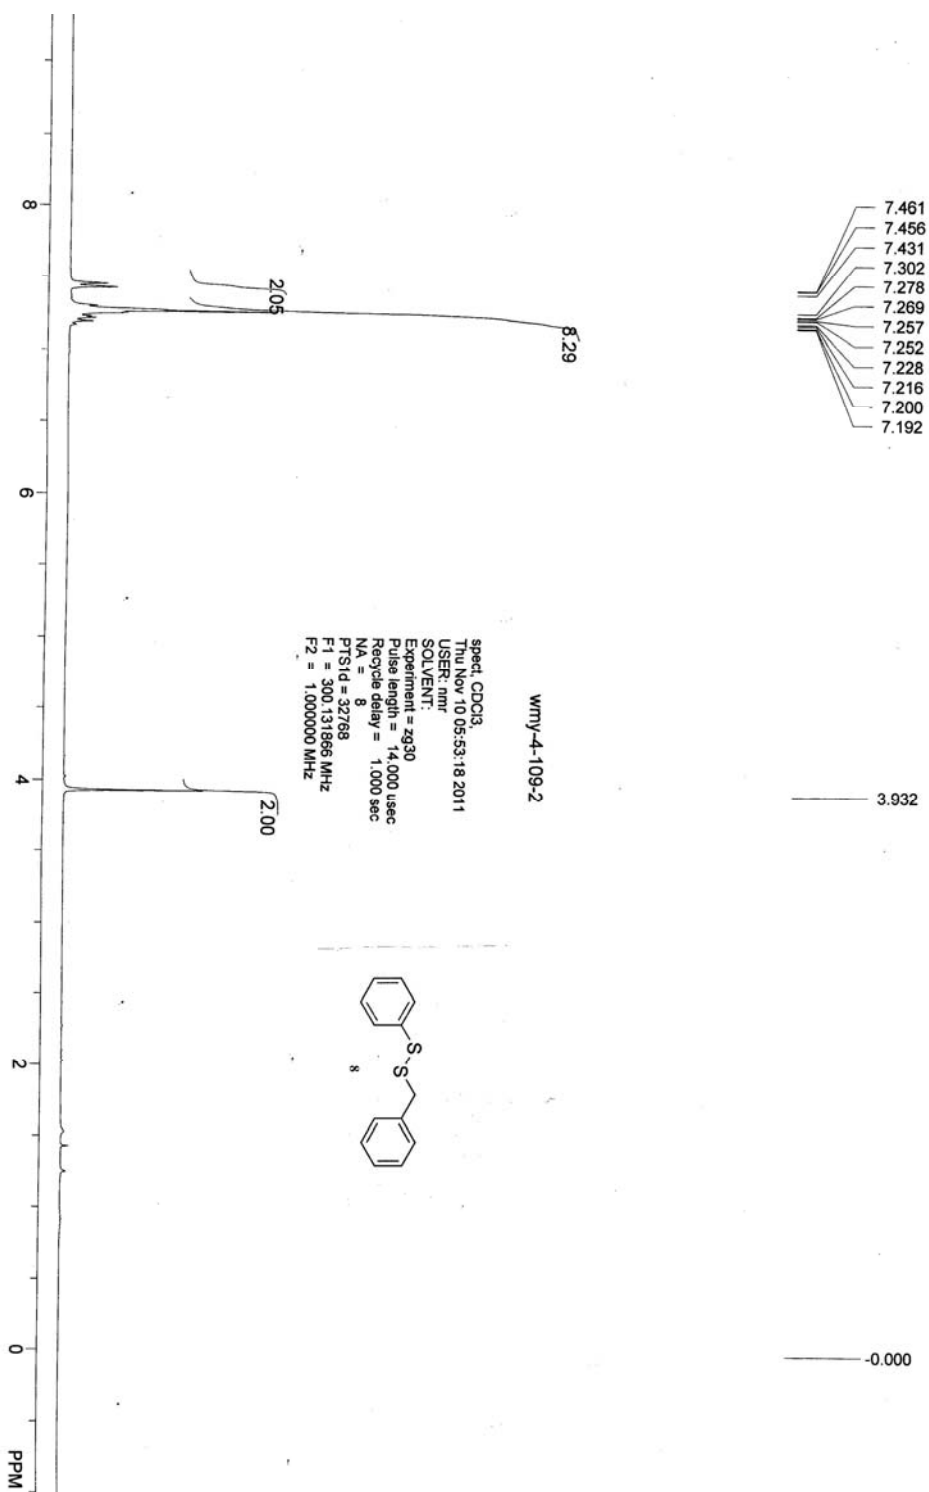

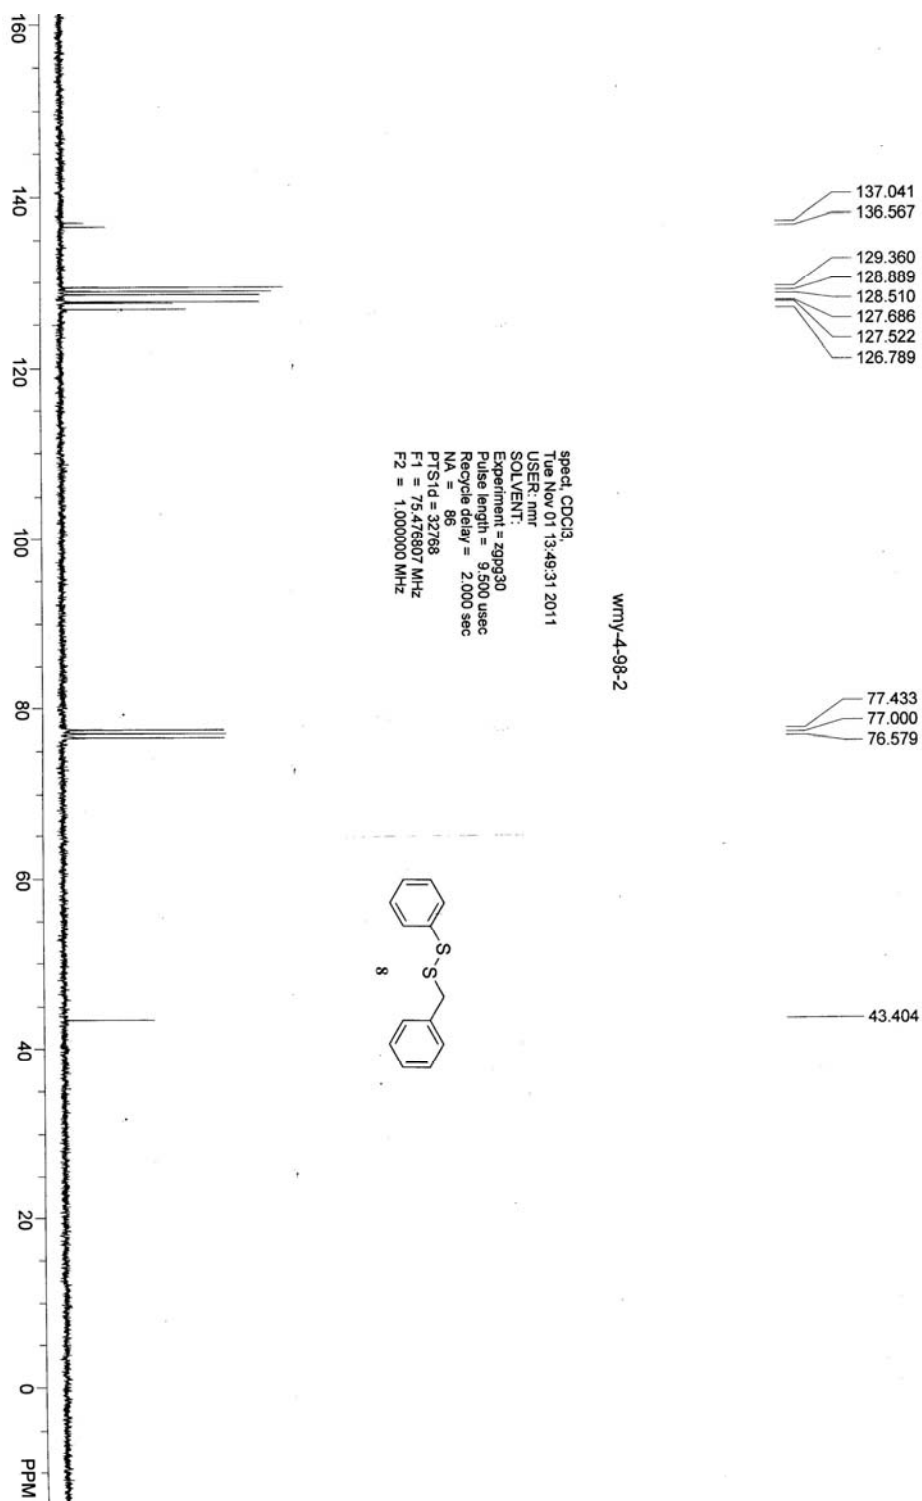

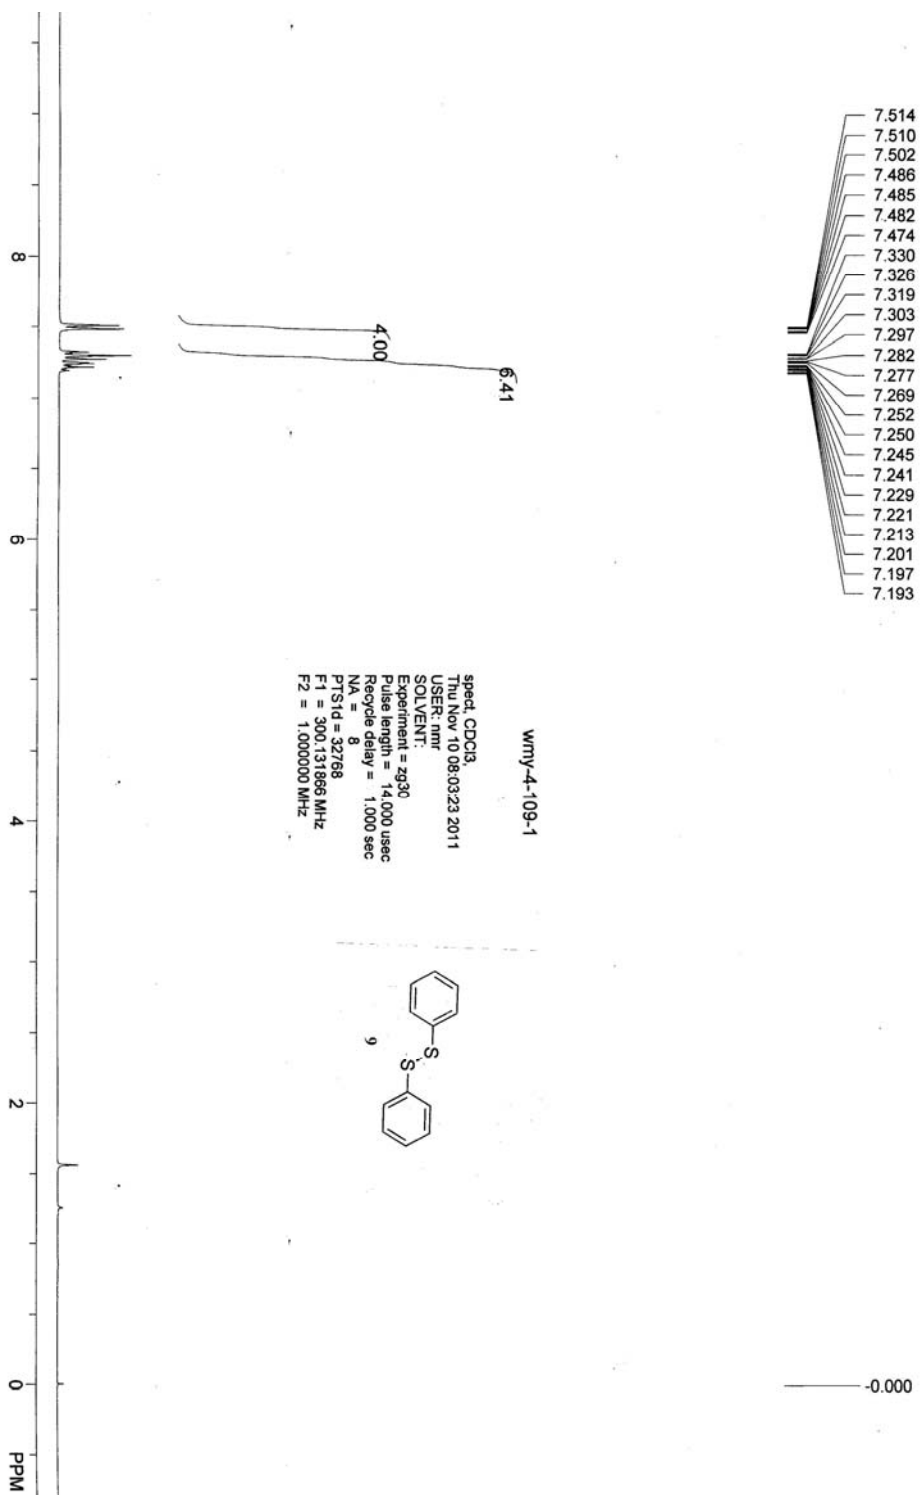

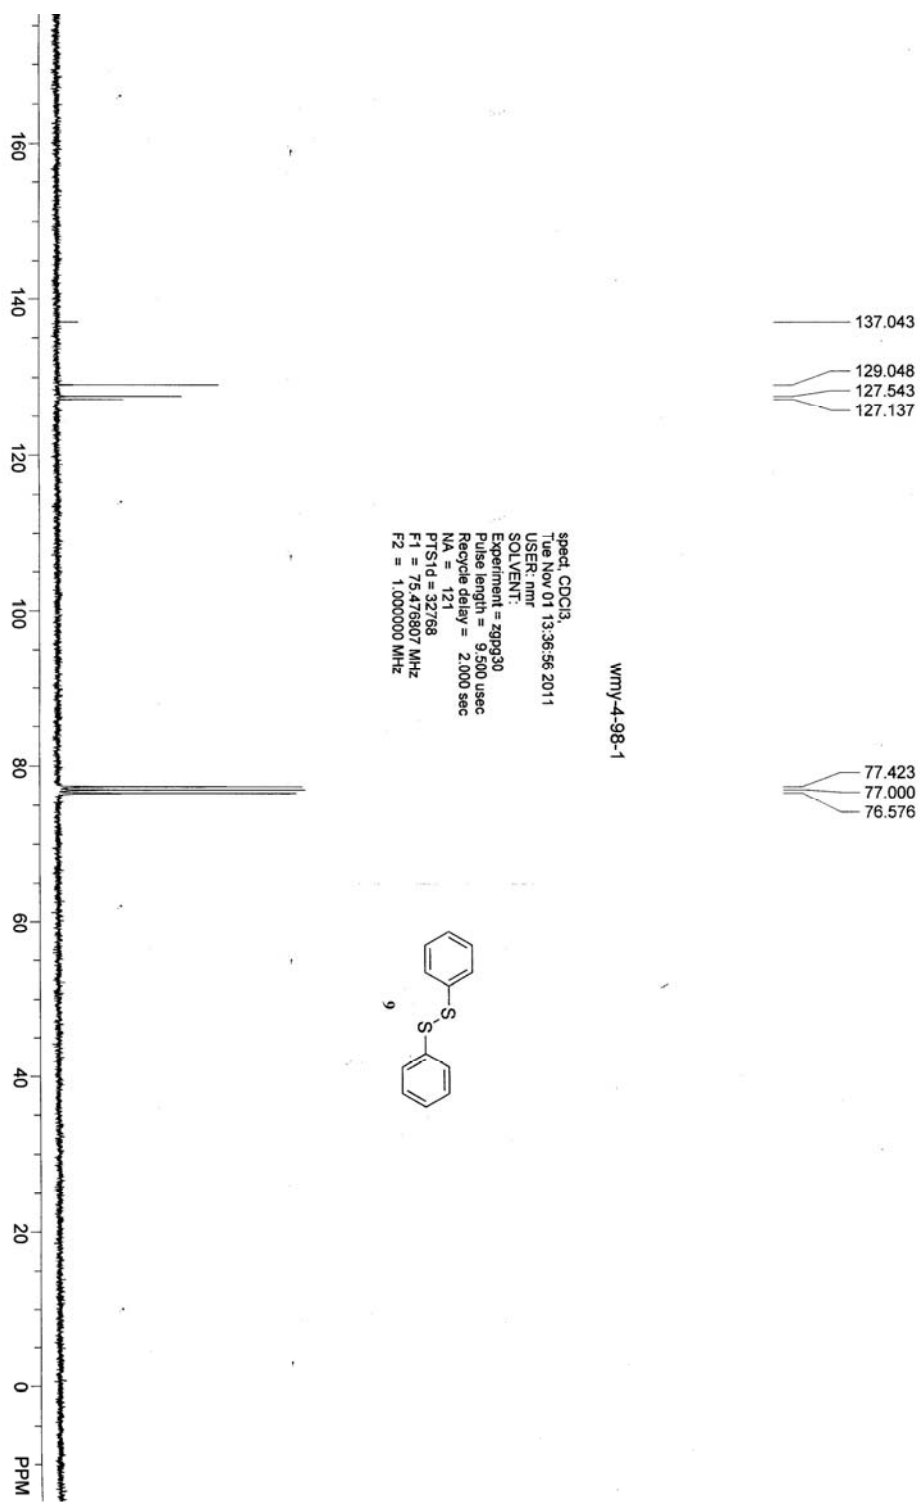

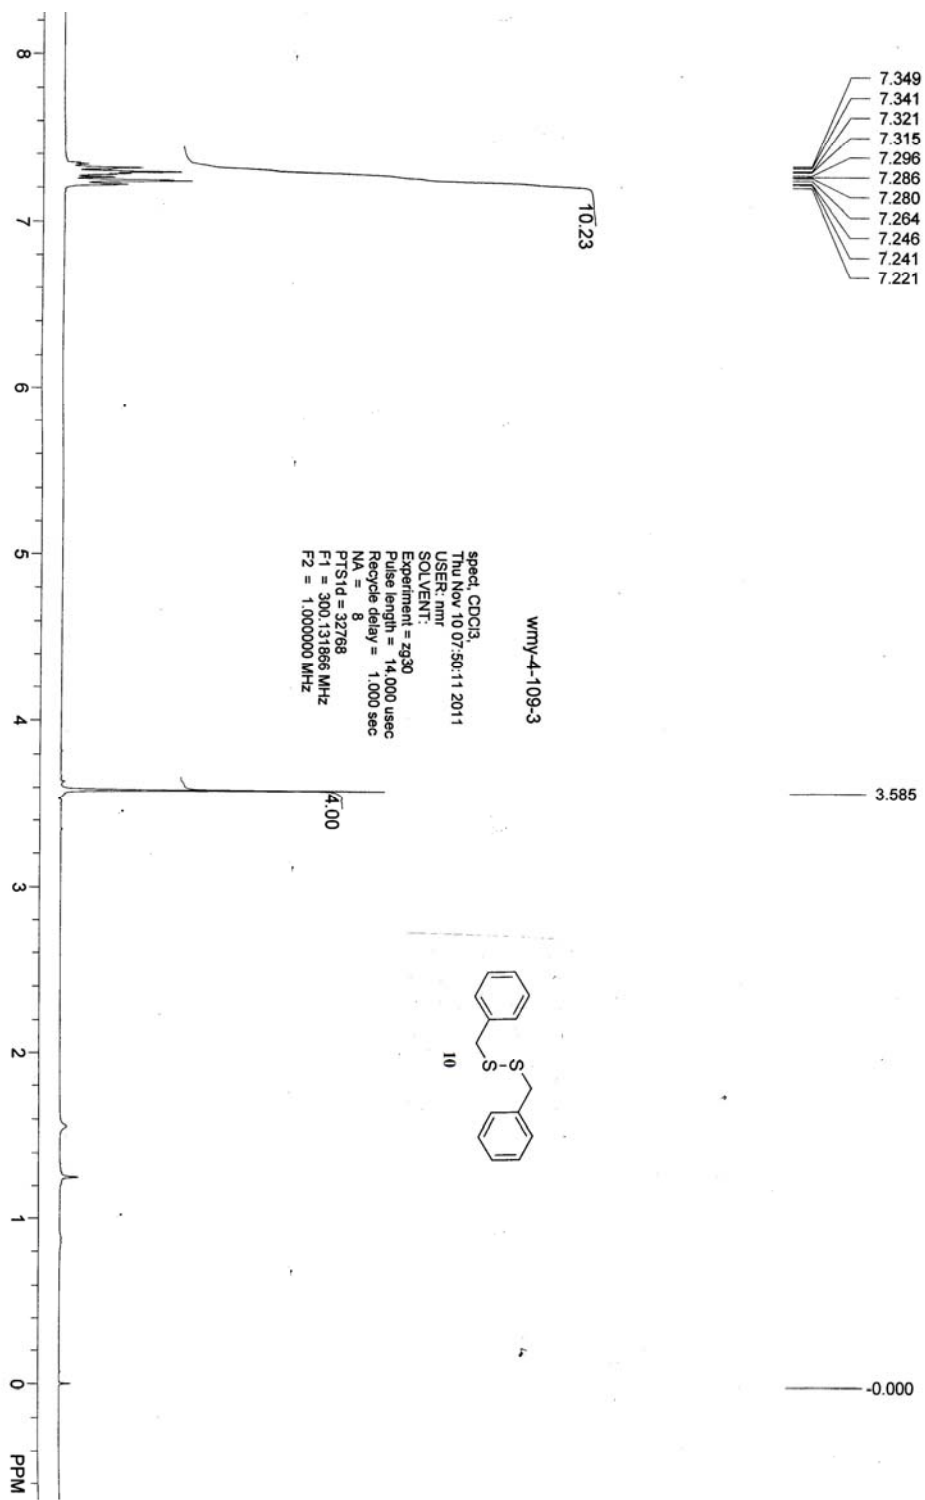



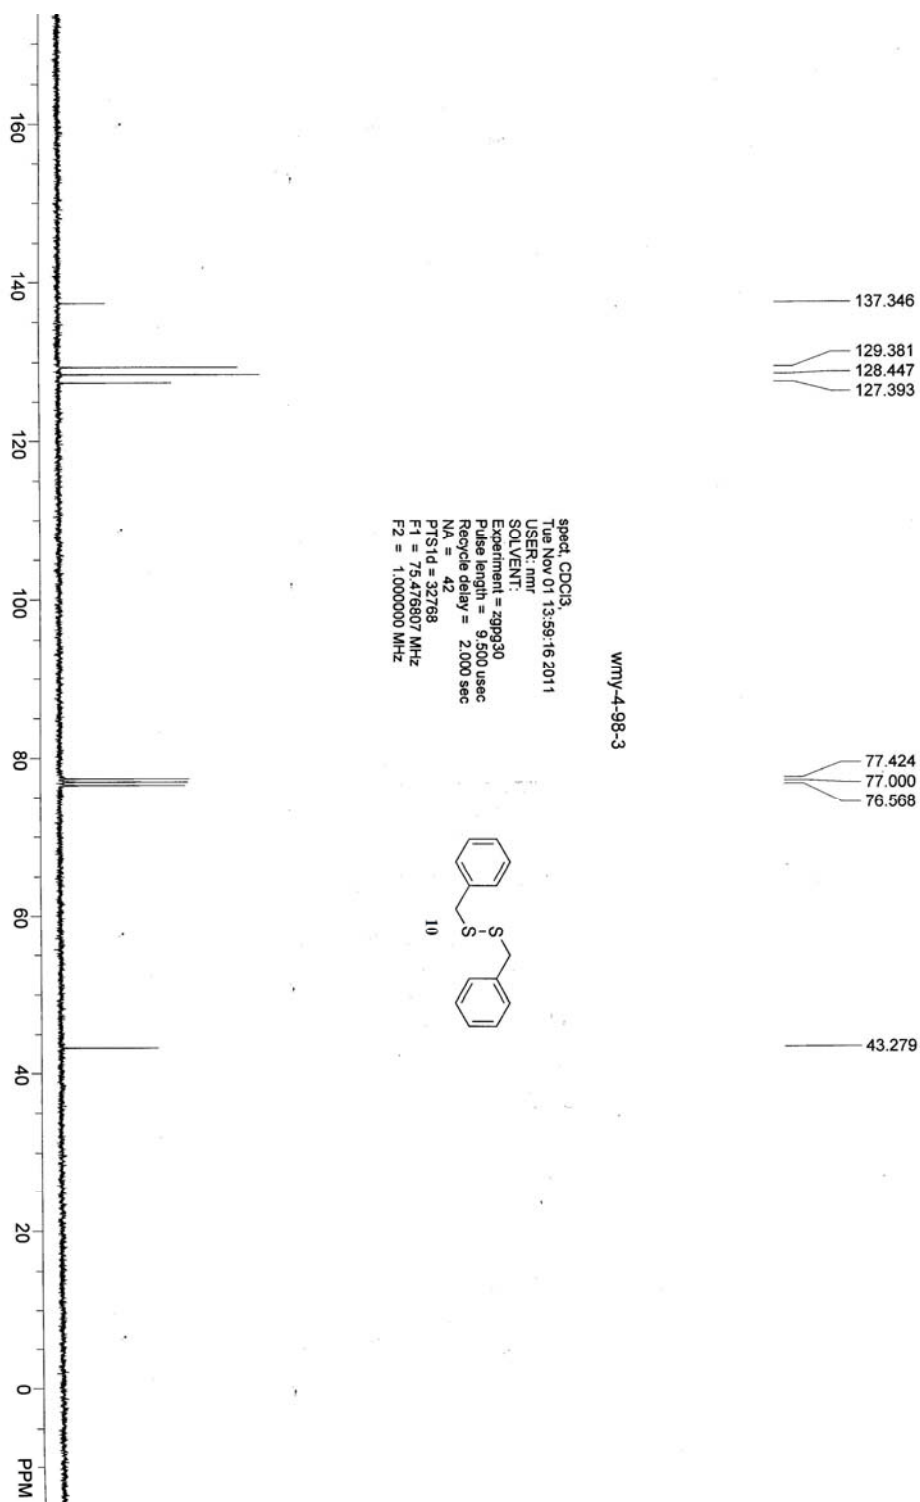

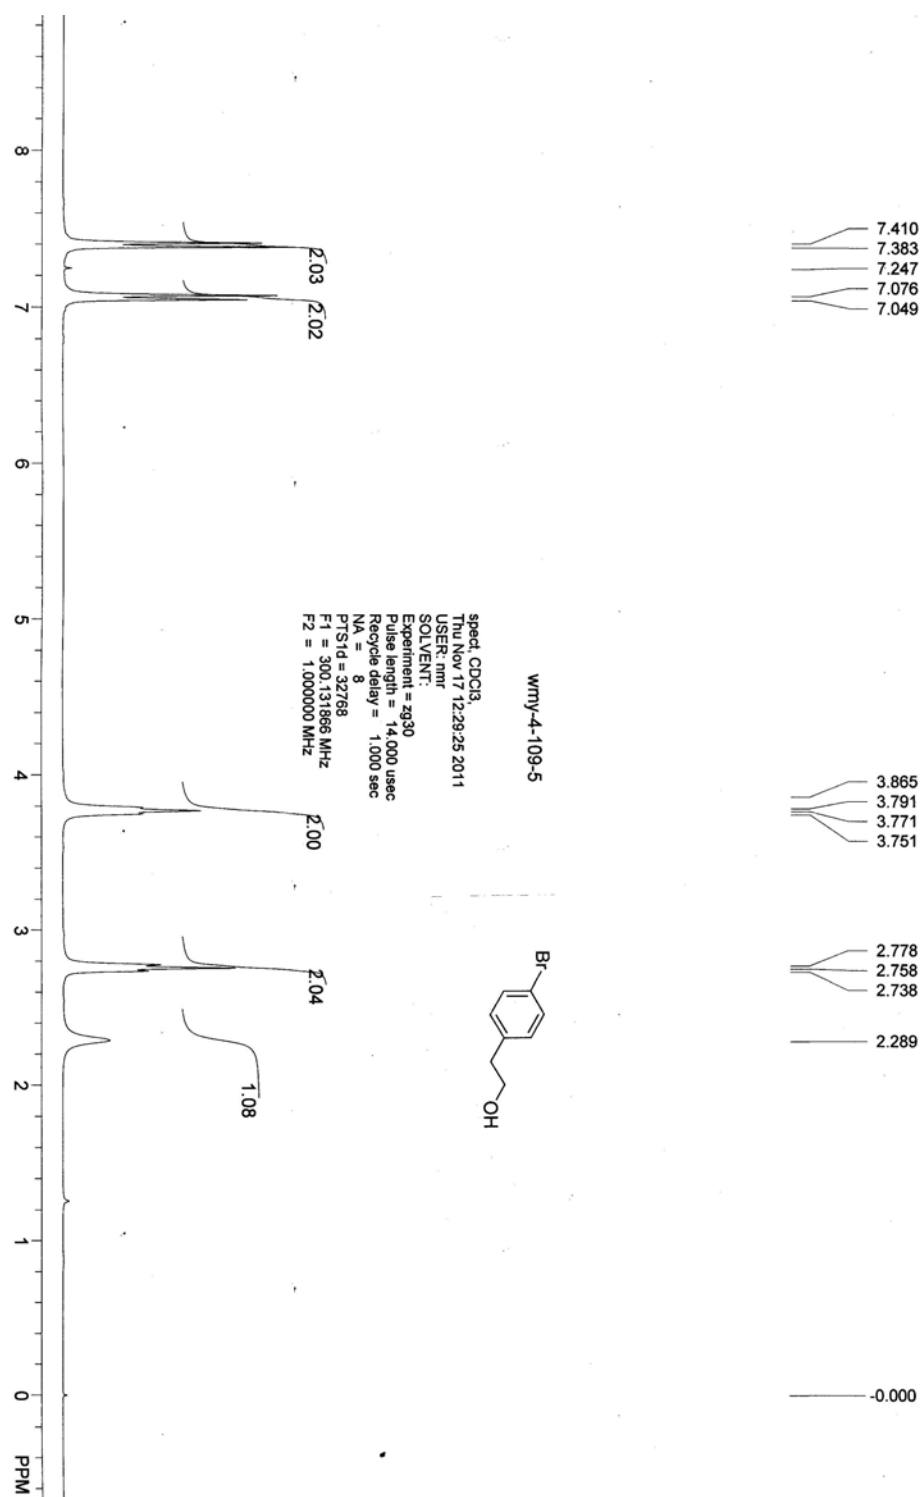

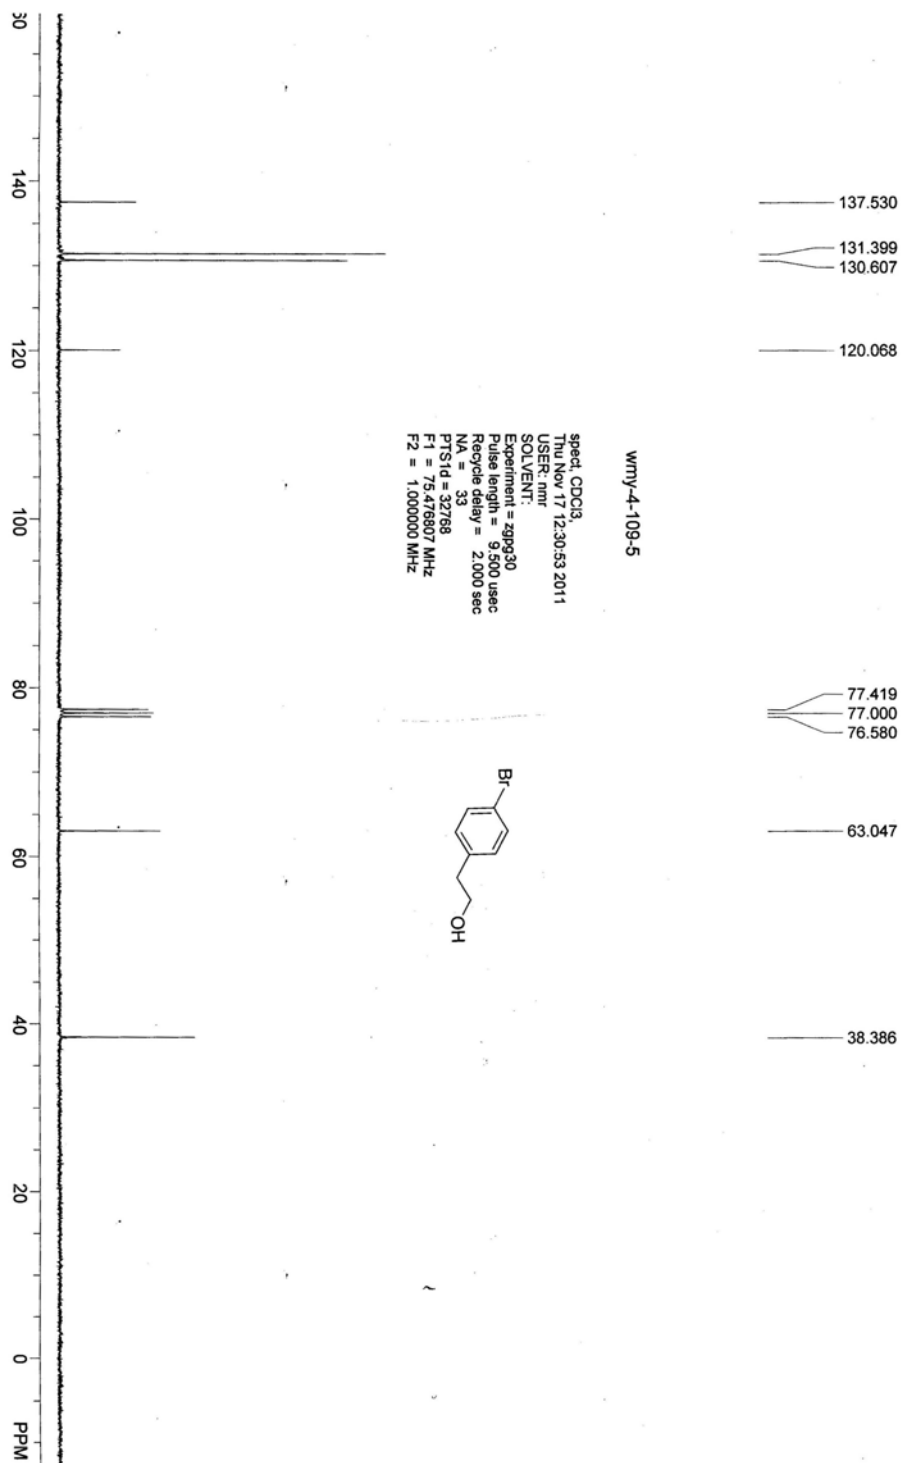

Supplement: c2sc21920d.pdf [file c2sc21920d.pdf]
